# Supplementary material for: Malaria treatment-seeking behaviour and its associated factors: A cross-sectional study in rural East Nusa Tenggara Province, Indonesia
Source: PubMed Central journal article supplement (PMC8815915; doi:10.1371/journal.pone.0263178), 2022-02-04
Supplement: pone.0263178.s002.pdf [file pone.0263178.s002.pdf]

| RID    | G | AG | D | Edu | Eth | Job | SES | FZ | HF | DHF | Inc1 | Inc2 | Q1 | Q2 | Q3 | Q4 | O1 | O2 | O3 |
|--------|---|----|---|-----|-----|-----|-----|----|----|-----|------|------|----|----|----|----|----|----|----|
| 10111  | 1 | 4  | 2 | 3   | 3   | 2   | 3   | 2  | 1  | 2   | 1    | 1    | 1  | 1  | 1  | 1  | 0  | 0  | 0  |
| 10112  | 1 | 2  | 2 | 5   | 3   | 5   | 3   | 1  | 1  | 2   | 0    | 0    | 1  | 1  | 1  | 1  | 0  | 0  | 0  |
| 10113  | 1 | 3  | 2 | 2   | 3   | 2   | 2   | 1  | 1  | 2   | 0    | 0    | 1  | 1  | 1  | 1  | 0  | 0  | 0  |
| 10114  | 1 | 1  | 2 | 5   | 3   | 5   | 2   | 1  | 1  | 2   | 0    | 0    | 1  | 1  | 1  | 1  | 0  | 0  | 0  |
| 10115  | 1 | 4  | 2 | 3   | 3   | 5   | 2   | 1  | 1  | 2   | 1    | 1    | 1  | 1  | 1  | 1  | 0  | 0  | 0  |
| 10116  | 1 | 3  | 2 | 3   | 3   | 2   | 2   | 1  | 1  | 2   | 0    | 0    | 1  | 1  | 1  | 1  | 0  | 0  | 0  |
| 10117  | 1 | 1  | 2 | 5   | 3   | 2   | 2   | 1  | 1  | 2   | 0    | 0    | 1  | 1  | 1  | 1  | 0  | 0  | 0  |
| 10118  | 1 | 3  | 2 | 4   | 3   | 5   | 2   | 1  | 1  | 2   | 1    | 0    | 1  | 1  | 1  | 1  | 0  | 0  | 0  |
| 10119  | 1 | 3  | 2 | 3   | 3   | 2   | 2   | 1  | 1  | 2   | 0    | 0    | 1  | 1  | 1  | 1  | 0  | 0  | 0  |
| 101110 | 1 | 4  | 2 | 2   | 3   | 2   | 2   | 1  | 1  | 2   | 0    | 0    | 1  | 1  | 1  | 1  | 0  | 0  | 0  |
| 101111 | 1 | 3  | 2 | 2   | 3   | 2   | 2   | 2  | 1  | 2   | 0    | 0    | 1  | 1  | 1  | 1  | 0  | 0  | 0  |
| 101112 | 1 | 1  | 2 | 5   | 3   | 5   | 2   | 1  | 1  | 2   | 1    | 0    | 1  | 1  | 1  | 1  | 0  | 0  | 0  |
| 101113 | 1 | 4  | 2 | 4   | 3   | 5   | 2   | 1  | 2  | 2   | 1    | 1    | 1  | 1  | 1  | 1  | 0  | 0  | 0  |
| 101114 | 1 | 5  | 2 | 5   | 3   | 5   | 3   | 1  | 1  | 2   | 1    | 1    | 1  | 1  | 1  | 1  | 0  | 0  | 0  |
| 101115 | 0 | 5  | 2 | 1   | 3   | 2   | 1   | 1  | 1  | 2   | 0    | 0    | 0  | 99 | 99 | 99 | 99 | 99 | 99 |
| 101116 | 0 | 2  | 2 | 3   | 3   | 1   | 2   | 2  | 1  | 1   | 0    | 0    | 1  | 1  | 1  | 1  | 0  | 0  | 0  |
| 101117 | 1 | 3  | 2 | 5   | 3   | 5   | 3   | 1  | 1  | 1   | 1    | 1    | 1  | 1  | 2  | 1  | 1  | 0  | 1  |
| 101118 | 1 | 4  | 2 | 3   | 3   | 2   | 2   | 1  | 1  | 1   | 0    | 0    | 1  | 1  | 1  | 1  | 0  | 0  | 0  |
| 101119 | 1 | 2  | 2 | 3   | 3   | 2   | 2   | 2  | 1  | 1   | 0    | 0    | 1  | 1  | 1  | 1  | 0  | 0  | 0  |
| 101120 | 0 | 4  | 2 | 2   | 3   | 1   | 1   | 1  | 1  | 1   | 0    | 0    | 1  | 1  | 1  | 1  | 0  | 0  | 0  |
| 101121 | 1 | 3  | 2 | 3   | 3   | 2   | 1   | 1  | 1  | 1   | 0    | 0    | 1  | 1  | 1  | 1  | 0  | 0  | 0  |
| 101122 | 0 | 4  | 2 | 1   | 3   | 1   | 1   | 1  | 1  | 1   | 0    | 0    | 1  | 1  | 1  | 1  | 0  | 0  | 0  |
| 101123 | 0 | 4  | 2 | 3   | 3   | 1   | 2   | 1  | 1  | 1   | 0    | 0    | 1  | 1  | 1  | 1  | 0  | 0  | 0  |
| 101124 | 0 | 4  | 2 | 1   | 3   | 1   | 2   | 1  | 1  | 1   | 0    | 0    | 1  | 1  | 1  | 1  | 0  | 0  | 0  |
| 101125 | 1 | 5  | 2 | 1   | 3   | 2   | 2   | 1  | 1  | 1   | 0    | 0    | 1  | 1  | 1  | 1  | 0  | 0  | 0  |
| 101126 | 0 | 3  | 2 | 3   | 3   | 1   | 2   | 1  | 1  | 1   | 0    | 0    | 1  | 1  | 1  | 1  | 0  | 0  | 0  |
| 101127 | 1 | 3  | 2 | 3   | 3   | 2   | 2   | 1  | 1  | 1   | 0    | 0    | 1  | 1  | 1  | 1  | 0  | 0  | 0  |
| 101128 | 1 | 4  | 2 | 3   | 3   | 2   | 2   | 1  | 1  | 1   | 0    | 0    | 1  | 1  | 1  | 1  | 0  | 0  | 0  |
| 101129 | 0 | 2  | 2 | 4   | 3   | 1   | 1   | 1  | 1  | 1   | 0    | 0    | 1  | 1  | 1  | 1  | 0  | 0  | 0  |
| 101130 | 1 | 4  | 2 | 3   | 3   | 2   | 2   | 1  | 1  | 1   | 0    | 0    | 1  | 1  | 1  | 1  | 0  | 0  | 0  |
| 10121  | 0 | 1  | 2 | 3   | 3   | 1   | 2   | 1  | 3  | 3   | 0    | 0    | 1  | 1  | 1  | 1  | 0  | 0  | 0  |
| 10122  | 1 | 2  | 2 | 4   | 3   | 2   | 2   | 2  | 3  | 3   | 0    | 0    | 1  | 1  | 1  | 1  | 0  | 0  | 0  |
| 10123  | 0 | 2  | 2 | 2   | 3   | 1   | 2   | 2  | 3  | 3   | 0    | 0    | 1  | 1  | 1  | 1  | 0  | 0  | 0  |
| 10124  | 0 | 1  | 2 | 4   | 3   | 1   | 2   | 1  | 3  | 3   | 0    | 0    | 1  | 1  | 1  | 1  | 0  | 0  | 0  |
| 10125  | 0 | 1  | 2 | 4   | 3   | 1   | 2   | 1  | 3  | 3   | 0    | 0    | 1  | 1  | 1  | 1  | 0  | 0  | 0  |
| 10126  | 0 | 5  | 2 | 1   | 3   | 2   | 1   | 1  | 3  | 3   | 0    | 0    | 0  | 99 | 99 | 99 | 99 | 99 | 99 |
| 10127  | 1 | 5  | 2 | 1   | 3   | 2   | 1   | 1  | 3  | 3   | 0    | 0    | 1  | 1  | 3  | 1  | 1  | 0  | 1  |
| 10128  | 0 | 3  | 2 | 2   | 3   | 1   | 2   | 1  | 3  | 2   | 0    | 0    | 1  | 1  | 1  | 1  | 0  | 0  | 0  |
| 10129  | 1 | 3  | 2 | 1   | 3   | 2   | 2   | 1  | 3  | 2   | 0    | 0    | 1  | 1  | 3  | 1  | 1  | 0  | 1  |
| 101210 | 0 | 2  | 2 | 1   | 3   | 1   | 2   | 2  | 3  | 2   | 0    | 0    | 1  | 1  | 1  | 1  | 0  | 0  | 0  |
| 101211 | 0 | 4  | 2 | 1   | 3   | 1   | 2   | 1  | 3  | 2   | 0    | 0    | 1  | 1  | 1  | 1  | 0  | 0  | 0  |
| 101212 | 0 | 2  | 2 | 4   | 3   | 1   | 3   | 1  | 3  | 2   | 0    | 0    | 1  | 1  | 3  | 1  | 1  | 0  | 1  |
| 101213 | 1 | 5  | 2 | 2   | 3   | 2   | 2   | 1  | 3  | 2   | 0    | 0    | 1  | 1  | 3  | 1  | 1  | 0  | 1  |
| 101214 | 1 | 4  | 2 | 1   | 3   | 2   | 2   | 1  | 3  | 2   | 0    | 0    | 1  | 1  | 1  | 1  | 0  | 0  | 0  |
| 101215 | 0 | 1  | 2 | 1   | 3   | 1   | 2   | 1  | 3  | 2   | 0    | 0    | 0  | 99 | 99 | 99 | 99 | 99 | 99 |
| 101216 | 0 | 5  | 2 | 1   | 3   | 1   | 1   | 1  | 3  | 2   | 0    | 0    | 1  | 1  | 1  | 1  | 0  | 0  | 0  |
| 101217 | 1 | 2  | 2 | 2   | 3   | 5   | 2   | 1  | 3  | 2   | 0    | 0    | 1  | 1  | 1  | 1  | 0  | 0  | 0  |
| 101218 | 0 | 1  | 2 | 2   | 3   | 1   | 2   | 1  | 3  | 2   | 0    | 0    | 1  | 1  | 1  | 1  | 0  | 0  | 0  |
| 101219 | 1 | 2  | 2 | 3   | 3   | 4   | 2   | 1  | 3  | 3   | 0    | 0    | 1  | 1  | 1  | 1  | 0  | 0  | 0  |
| 101220 | 0 | 2  | 2 | 2   | 3   | 1   | 2   | 1  | 3  | 3   | 0    | 0    | 1  | 1  | 1  | 1  | 0  | 0  | 0  |
| 101221 | 1 | 2  | 2 | 3   | 3   | 4   | 2   | 1  | 3  | 3   | 0    | 0    | 1  | 1  | 1  | 1  | 0  | 0  | 0  |
| 101222 | 1 | 2  | 2 | 4   | 3   | 4   | 3   | 1  | 3  | 3   | 1    | 0    | 1  | 1  | 1  | 1  | 0  | 0  | 0  |
| 101223 | 1 | 4  | 2 | 1   | 3   | 4   | 2   | 1  | 3  | 3   | 0    | 0    | 1  | 1  | 1  | 1  | 0  | 0  | 0  |
| 101224 | 0 | 3  | 2 | 2   | 3   | 1   | 2   | 1  | 3  | 2   | 0    | 0    | 1  | 1  | 1  | 1  | 0  | 0  | 0  |
| 101225 | 1 | 1  | 2 | 3   | 3   | 4   | 2   | 1  | 3  | 3   | 0    | 0    | 1  | 1  | 1  | 1  | 0  | 0  | 0  |

|        |   |   |   |   |   |   |   |   |   |   |   |   |   |    |    |    |    |    |    |
|--------|---|---|---|---|---|---|---|---|---|---|---|---|---|----|----|----|----|----|----|
| 101226 | 0 | 3 | 2 | 2 | 2 | 1 | 1 | 1 | 4 | 1 | 0 | 0 | 1 | 1  | 3  | 1  | 1  | 0  | 1  |
| 101227 | 1 | 2 | 2 | 3 | 2 | 4 | 2 | 1 | 3 | 1 | 0 | 0 | 1 | 1  | 1  | 1  | 0  | 0  | 0  |
| 101228 | 0 | 3 | 2 | 3 | 3 | 1 | 2 | 1 | 3 | 1 | 0 | 0 | 1 | 1  | 1  | 1  | 0  | 0  | 0  |
| 101229 | 1 | 2 | 2 | 4 | 3 | 1 | 2 | 1 | 3 | 1 | 1 | 0 | 1 | 1  | 1  | 1  | 0  | 0  | 0  |
| 101230 | 1 | 3 | 2 | 3 | 3 | 2 | 3 | 1 | 3 | 1 | 0 | 0 | 1 | 1  | 1  | 1  | 0  | 0  | 0  |
| 101231 | 1 | 5 | 2 | 1 | 3 | 2 | 1 | 1 | 3 | 1 | 0 | 0 | 0 | 99 | 99 | 99 | 99 | 99 | 99 |
| 101232 | 1 | 5 | 2 | 1 | 3 | 2 | 1 | 1 | 3 | 2 | 0 | 0 | 1 | 1  | 1  | 1  | 0  | 0  | 0  |
| 101233 | 1 | 2 | 2 | 1 | 3 | 2 | 1 | 1 | 3 | 1 | 0 | 0 | 1 | 1  | 1  | 1  | 0  | 0  | 0  |
| 101234 | 1 | 3 | 2 | 2 | 3 | 2 | 1 | 2 | 3 | 3 | 0 | 0 | 1 | 1  | 1  | 1  | 0  | 0  | 0  |
| 101235 | 1 | 5 | 2 | 1 | 3 | 2 | 1 | 1 | 3 | 3 | 0 | 0 | 1 | 1  | 1  | 1  | 0  | 0  | 0  |
| 10131  | 0 | 3 | 2 | 3 | 3 | 1 | 2 | 1 | 4 | 1 | 0 | 0 | 1 | 1  | 1  | 1  | 0  | 0  | 0  |
| 10132  | 1 | 1 | 2 | 4 | 3 | 5 | 2 | 1 | 4 | 1 | 0 | 0 | 1 | 1  | 1  | 1  | 0  | 0  | 0  |
| 10133  | 1 | 3 | 2 | 4 | 3 | 5 | 2 | 1 | 4 | 1 | 0 | 0 | 1 | 1  | 1  | 1  | 0  | 0  | 0  |
| 10134  | 0 | 2 | 2 | 4 | 3 | 1 | 2 | 1 | 4 | 1 | 1 | 0 | 1 | 1  | 1  | 1  | 0  | 0  | 0  |
| 10135  | 0 | 1 | 2 | 4 | 3 | 1 | 2 | 1 | 4 | 1 | 0 | 0 | 1 | 1  | 1  | 1  | 0  | 0  | 0  |
| 10136  | 0 | 3 | 2 | 4 | 3 | 1 | 2 | 1 | 4 | 1 | 0 | 0 | 1 | 1  | 1  | 1  | 0  | 0  | 0  |
| 10137  | 1 | 2 | 2 | 4 | 3 | 5 | 3 | 2 | 4 | 2 | 0 | 0 | 1 | 1  | 1  | 1  | 0  | 0  | 0  |
| 10138  | 0 | 2 | 2 | 4 | 3 | 1 | 2 | 1 | 4 | 2 | 1 | 0 | 1 | 1  | 1  | 1  | 0  | 0  | 0  |
| 10139  | 0 | 2 | 2 | 3 | 3 | 1 | 2 | 1 | 4 | 2 | 1 | 0 | 1 | 1  | 1  | 1  | 0  | 0  | 0  |
| 101310 | 1 | 2 | 2 | 4 | 3 | 5 | 2 | 1 | 4 | 2 | 0 | 0 | 1 | 1  | 1  | 1  | 0  | 0  | 0  |
| 101311 | 1 | 1 | 2 | 4 | 3 | 5 | 2 | 1 | 4 | 2 | 0 | 0 | 1 | 1  | 1  | 1  | 0  | 0  | 0  |
| 101312 | 0 | 2 | 2 | 4 | 3 | 1 | 2 | 1 | 4 | 2 | 0 | 0 | 1 | 1  | 1  | 1  | 0  | 0  | 0  |
| 101313 | 0 | 3 | 2 | 1 | 3 | 1 | 1 | 1 | 4 | 2 | 0 | 0 | 1 | 1  | 1  | 1  | 0  | 0  | 0  |
| 101314 | 1 | 2 | 2 | 4 | 3 | 2 | 2 | 1 | 4 | 2 | 0 | 0 | 1 | 1  | 1  | 1  | 0  | 0  | 0  |
| 101315 | 1 | 1 | 2 | 3 | 3 | 2 | 1 | 1 | 4 | 2 | 0 | 0 | 1 | 1  | 1  | 1  | 0  | 0  | 0  |
| 101316 | 0 | 3 | 2 | 3 | 3 | 1 | 2 | 1 | 4 | 2 | 0 | 0 | 1 | 1  | 1  | 1  | 0  | 0  | 0  |
| 101317 | 0 | 2 | 2 | 3 | 3 | 1 | 2 | 1 | 4 | 2 | 0 | 0 | 1 | 1  | 1  | 1  | 0  | 0  | 0  |
| 101318 | 0 | 4 | 2 | 4 | 3 | 1 | 2 | 2 | 4 | 2 | 0 | 0 | 1 | 1  | 1  | 1  | 0  | 0  | 0  |
| 101319 | 1 | 3 | 2 | 3 | 3 | 3 | 3 | 1 | 4 | 2 | 0 | 0 | 1 | 1  | 1  | 1  | 0  | 0  | 0  |
| 101320 | 1 | 5 | 2 | 2 | 3 | 2 | 2 | 1 | 4 | 2 | 0 | 0 | 1 | 1  | 1  | 1  | 0  | 0  | 0  |
| 101321 | 0 | 4 | 2 | 2 | 3 | 1 | 2 | 1 | 4 | 2 | 0 | 0 | 1 | 1  | 1  | 1  | 0  | 0  | 0  |
| 101322 | 1 | 2 | 2 | 3 | 3 | 2 | 2 | 1 | 4 | 2 | 0 | 0 | 1 | 1  | 1  | 1  | 0  | 0  | 0  |
| 101323 | 0 | 2 | 2 | 1 | 3 | 2 | 2 | 2 | 4 | 2 | 0 | 0 | 1 | 1  | 1  | 1  | 0  | 0  | 0  |
| 101324 | 1 | 4 | 2 | 2 | 3 | 2 | 2 | 1 | 4 | 2 | 0 | 0 | 1 | 1  | 1  | 1  | 0  | 0  | 0  |
| 101325 | 1 | 3 | 2 | 3 | 3 | 1 | 2 | 1 | 4 | 2 | 0 | 0 | 1 | 1  | 1  | 1  | 0  | 0  | 0  |
| 101326 | 0 | 1 | 2 | 1 | 3 | 1 | 2 | 1 | 4 | 2 | 0 | 0 | 1 | 1  | 1  | 1  | 0  | 0  | 0  |
| 101327 | 1 | 1 | 2 | 3 | 3 | 2 | 2 | 1 | 4 | 2 | 0 | 0 | 1 | 1  | 1  | 1  | 0  | 0  | 0  |
| 101328 | 1 | 5 | 2 | 1 | 3 | 2 | 2 | 1 | 4 | 2 | 0 | 0 | 1 | 1  | 1  | 1  | 0  | 0  | 0  |
| 101329 | 0 | 1 | 2 | 4 | 3 | 1 | 2 | 1 | 4 | 2 | 0 | 0 | 1 | 1  | 1  | 1  | 0  | 0  | 0  |
| 101330 | 1 | 5 | 2 | 3 | 3 | 2 | 2 | 1 | 4 | 2 | 0 | 0 | 1 | 1  | 1  | 1  | 0  | 0  | 0  |
| 10141  | 1 | 2 | 2 | 5 | 3 | 5 | 3 | 1 | 4 | 1 | 0 | 0 | 1 | 1  | 1  | 1  | 0  | 0  | 0  |
| 10142  | 0 | 2 | 2 | 4 | 3 | 1 | 2 | 1 | 4 | 1 | 0 | 0 | 1 | 1  | 3  | 1  | 1  | 0  | 1  |
| 10143  | 1 | 5 | 2 | 2 | 3 | 5 | 2 | 1 | 4 | 1 | 1 | 1 | 1 | 1  | 3  | 2  | 1  | 0  | 1  |
| 10144  | 0 | 1 | 2 | 4 | 3 | 5 | 2 | 1 | 4 | 1 | 0 | 0 | 1 | 1  | 3  | 1  | 1  | 0  | 1  |
| 10145  | 1 | 4 | 2 | 1 | 3 | 2 | 1 | 2 | 4 | 1 | 0 | 0 | 0 | 99 | 99 | 99 | 99 | 99 | 99 |
| 10146  | 0 | 5 | 2 | 2 | 2 | 1 | 1 | 2 | 4 | 1 | 0 | 0 | 0 | 99 | 99 | 99 | 99 | 99 | 99 |
| 10147  | 1 | 2 | 2 | 4 | 3 | 5 | 2 | 2 | 4 | 1 | 0 | 0 | 1 | 1  | 2  | 1  | 1  | 0  | 1  |
| 10148  | 1 | 4 | 2 | 1 | 3 | 2 | 2 | 2 | 4 | 1 | 0 | 0 | 1 | 1  | 3  | 6  | 1  | 1  | 1  |
| 10149  | 0 | 3 | 2 | 2 | 3 | 1 | 3 | 2 | 4 | 2 | 0 | 0 | 1 | 1  | 1  | 1  | 0  | 0  | 0  |
| 101410 | 0 | 3 | 2 | 2 | 2 | 1 | 2 | 2 | 4 | 2 | 0 | 0 | 1 | 0  | 5  | 5  | 1  | 1  | 1  |
| 101411 | 1 | 5 | 2 | 1 | 3 | 5 | 1 | 1 | 4 | 2 | 0 | 0 | 0 | 99 | 99 | 99 | 99 | 99 | 99 |
| 101412 | 1 | 3 | 2 | 2 | 3 | 2 | 2 | 1 | 4 | 2 | 0 | 0 | 1 | 1  | 5  | 5  | 1  | 1  | 1  |
| 101413 | 1 | 2 | 2 | 4 | 3 | 2 | 2 | 1 | 4 | 2 | 0 | 0 | 1 | 1  | 1  | 1  | 0  | 0  | 0  |
| 101414 | 1 | 3 | 2 | 3 | 3 | 2 | 1 | 1 | 4 | 2 | 0 | 0 | 0 | 99 | 99 | 99 | 99 | 99 | 99 |
| 101415 | 1 | 4 | 2 | 1 | 3 | 2 | 1 | 1 | 4 | 2 | 0 | 0 | 0 | 99 | 99 | 99 | 99 | 99 | 99 |
| 101416 | 0 | 4 | 2 | 1 | 3 | 1 | 1 | 1 | 4 | 2 | 0 | 0 | 0 | 99 | 99 | 99 | 99 | 99 | 99 |

|        |   |   |   |   |   |   |   |   |   |   |   |   |   |    |    |    |    |    |    |
|--------|---|---|---|---|---|---|---|---|---|---|---|---|---|----|----|----|----|----|----|
| 101417 | 1 | 3 | 2 | 2 | 3 | 2 | 2 | 1 | 4 | 2 | 0 | 0 | 1 | 1  | 2  | 1  | 1  | 0  | 1  |
| 101418 | 1 | 4 | 2 | 2 | 3 | 2 | 1 | 1 | 4 | 2 | 0 | 0 | 1 | 1  | 3  | 1  | 1  | 0  | 1  |
| 101419 | 1 | 3 | 2 | 2 | 3 | 2 | 2 | 1 | 4 | 2 | 0 | 0 | 1 | 1  | 2  | 2  | 1  | 0  | 1  |
| 101420 | 0 | 2 | 2 | 3 | 3 | 1 | 2 | 2 | 4 | 2 | 0 | 0 | 1 | 1  | 3  | 1  | 1  | 0  | 1  |
| 101421 | 1 | 4 | 2 | 2 | 3 | 2 | 2 | 1 | 4 | 2 | 0 | 0 | 0 | 99 | 99 | 99 | 99 | 99 | 99 |
| 101422 | 0 | 3 | 2 | 1 | 3 | 1 | 1 | 1 | 4 | 2 | 0 | 0 | 0 | 99 | 99 | 99 | 99 | 99 | 99 |
| 101423 | 1 | 4 | 2 | 2 | 3 | 2 | 2 | 1 | 4 | 2 | 0 | 0 | 1 | 1  | 2  | 1  | 1  | 0  | 1  |
| 101424 | 0 | 1 | 2 | 4 | 2 | 1 | 2 | 1 | 4 | 1 | 0 | 0 | 1 | 1  | 2  | 1  | 1  | 0  | 1  |
| 101425 | 1 | 1 | 2 | 4 | 3 | 4 | 2 | 1 | 4 | 1 | 0 | 0 | 1 | 1  | 3  | 1  | 1  | 0  | 1  |
| 101426 | 0 | 1 | 2 | 3 | 3 | 1 | 1 | 1 | 4 | 2 | 0 | 0 | 1 | 1  | 1  | 1  | 0  | 0  | 0  |
| 101427 | 0 | 3 | 2 | 3 | 3 | 1 | 2 | 1 | 4 | 2 | 0 | 0 | 1 | 1  | 2  | 1  | 1  | 0  | 1  |
| 101428 | 0 | 4 | 2 | 1 | 3 | 1 | 2 | 2 | 4 | 2 | 0 | 0 | 1 | 1  | 2  | 1  | 1  | 0  | 1  |
| 101429 | 1 | 2 | 2 | 3 | 3 | 2 | 2 | 1 | 4 | 2 | 0 | 0 | 1 | 1  | 3  | 1  | 1  | 0  | 1  |
| 101430 | 0 | 3 | 2 | 2 | 3 | 1 | 2 | 1 | 4 | 2 | 0 | 0 | 1 | 1  | 2  | 1  | 1  | 0  | 1  |
| 101431 | 1 | 4 | 2 | 2 | 3 | 2 | 2 | 2 | 4 | 2 | 0 | 0 | 1 | 1  | 2  | 1  | 1  | 0  | 1  |
| 101432 | 1 | 4 | 2 | 1 | 3 | 1 | 2 | 1 | 4 | 2 | 0 | 0 | 1 | 1  | 3  | 1  | 1  | 0  | 1  |
| 101433 | 0 | 1 | 2 | 3 | 3 | 1 | 2 | 1 | 4 | 2 | 0 | 0 | 1 | 1  | 2  | 1  | 1  | 0  | 1  |
| 101434 | 1 | 2 | 2 | 3 | 4 | 2 | 1 | 1 | 4 | 2 | 0 | 0 | 1 | 1  | 1  | 1  | 0  | 0  | 0  |
| 101435 | 1 | 2 | 2 | 3 | 3 | 4 | 2 | 1 | 4 | 2 | 0 | 0 | 1 | 1  | 2  | 1  | 1  | 0  | 1  |
| 10151  | 0 | 2 | 2 | 4 | 3 | 1 | 2 | 2 | 4 | 2 | 0 | 0 | 1 | 1  | 2  | 1  | 1  | 0  | 1  |
| 10152  | 1 | 4 | 2 | 4 | 3 | 4 | 2 | 1 | 4 | 2 | 0 | 0 | 1 | 1  | 3  | 2  | 1  | 0  | 1  |
| 10153  | 0 | 2 | 2 | 3 | 3 | 1 | 2 | 1 | 4 | 2 | 0 | 0 | 1 | 1  | 2  | 1  | 1  | 0  | 1  |
| 10154  | 0 | 1 | 2 | 4 | 3 | 5 | 2 | 2 | 4 | 2 | 1 | 0 | 1 | 1  | 2  | 2  | 1  | 0  | 1  |
| 10155  | 1 | 3 | 2 | 3 | 3 | 4 | 2 | 1 | 4 | 2 | 0 | 0 | 1 | 1  | 1  | 1  | 0  | 0  | 0  |
| 10156  | 1 | 3 | 2 | 3 | 3 | 5 | 2 | 1 | 4 | 2 | 0 | 0 | 1 | 1  | 2  | 1  | 1  | 0  | 1  |
| 10157  | 0 | 1 | 2 | 4 | 3 | 1 | 2 | 1 | 1 | 1 | 0 | 0 | 1 | 1  | 2  | 1  | 1  | 0  | 1  |
| 10158  | 0 | 2 | 2 | 4 | 3 | 1 | 2 | 1 | 1 | 1 | 0 | 0 | 1 | 1  | 3  | 1  | 1  | 0  | 1  |
| 10159  | 1 | 5 | 2 | 4 | 3 | 5 | 3 | 1 | 4 | 3 | 1 | 1 | 1 | 1  | 2  | 1  | 1  | 0  | 1  |
| 101510 | 1 | 1 | 2 | 4 | 3 | 4 | 2 | 1 | 1 | 1 | 0 | 0 | 1 | 1  | 2  | 1  | 1  | 0  | 1  |
| 101511 | 0 | 4 | 2 | 4 | 3 | 5 | 3 | 2 | 1 | 1 | 1 | 1 | 1 | 1  | 3  | 1  | 1  | 0  | 1  |
| 101512 | 0 | 2 | 2 | 5 | 3 | 1 | 1 | 1 | 1 | 1 | 0 | 0 | 1 | 1  | 2  | 4  | 1  | 1  | 1  |
| 101513 | 1 | 3 | 2 | 4 | 3 | 4 | 2 | 2 | 1 | 2 | 1 | 0 | 1 | 1  | 2  | 1  | 1  | 0  | 1  |
| 101514 | 1 | 5 | 2 | 3 | 3 | 4 | 2 | 1 | 1 | 2 | 0 | 0 | 1 | 1  | 1  | 1  | 0  | 0  | 0  |
| 101515 | 0 | 1 | 2 | 4 | 3 | 1 | 2 | 1 | 1 | 1 | 0 | 0 | 1 | 1  | 2  | 1  | 1  | 0  | 1  |
| 101516 | 1 | 2 | 2 | 2 | 3 | 4 | 2 | 1 | 1 | 1 | 0 | 0 | 1 | 1  | 2  | 2  | 1  | 0  | 1  |
| 101517 | 0 | 2 | 2 | 3 | 2 | 1 | 2 | 2 | 1 | 1 | 0 | 0 | 1 | 1  | 3  | 1  | 1  | 0  | 1  |
| 101518 | 1 | 3 | 2 | 4 | 3 | 4 | 2 | 1 | 1 | 1 | 0 | 0 | 1 | 1  | 2  | 1  | 1  | 0  | 1  |
| 101519 | 0 | 2 | 2 | 4 | 3 | 1 | 2 | 2 | 1 | 1 | 0 | 0 | 1 | 1  | 2  | 1  | 1  | 0  | 1  |
| 101520 | 1 | 4 | 2 | 4 | 3 | 4 | 3 | 2 | 1 | 2 | 1 | 1 | 1 | 1  | 2  | 1  | 1  | 0  | 1  |
| 101521 | 0 | 5 | 2 | 2 | 3 | 1 | 2 | 1 | 1 | 2 | 0 | 0 | 1 | 1  | 3  | 1  | 1  | 0  | 1  |
| 101522 | 1 | 5 | 2 | 3 | 3 | 5 | 2 | 1 | 1 | 2 | 1 | 1 | 1 | 1  | 2  | 1  | 1  | 0  | 1  |
| 101523 | 1 | 4 | 2 | 4 | 3 | 5 | 2 | 1 | 1 | 1 | 1 | 1 | 1 | 1  | 2  | 2  | 1  | 0  | 1  |
| 101524 | 0 | 3 | 2 | 4 | 3 | 5 | 3 | 1 | 1 | 1 | 1 | 1 | 1 | 1  | 3  | 2  | 1  | 0  | 1  |
| 101525 | 1 | 2 | 2 | 4 | 3 | 5 | 2 | 2 | 1 | 1 | 1 | 1 | 1 | 1  | 2  | 1  | 1  | 0  | 1  |
| 101526 | 1 | 2 | 2 | 4 | 3 | 5 | 2 | 1 | 1 | 1 | 1 | 1 | 1 | 1  | 2  | 1  | 1  | 0  | 1  |
| 101527 | 1 | 3 | 2 | 4 | 3 | 5 | 2 | 1 | 1 | 1 | 0 | 0 | 1 | 1  | 2  | 1  | 1  | 0  | 1  |
| 101528 | 1 | 4 | 2 | 2 | 3 | 2 | 2 | 1 | 1 | 1 | 1 | 1 | 1 | 1  | 2  | 1  | 1  | 0  | 1  |
| 101529 | 0 | 3 | 2 | 3 | 3 | 1 | 2 | 1 | 1 | 1 | 0 | 0 | 1 | 1  | 3  | 1  | 1  | 0  | 1  |
| 101530 | 0 | 3 | 2 | 4 | 3 | 1 | 2 | 1 | 1 | 1 | 0 | 0 | 1 | 1  | 2  | 1  | 1  | 0  | 1  |
| 10161  | 0 | 1 | 2 | 4 | 3 | 1 | 2 | 1 | 1 | 1 | 0 | 0 | 1 | 1  | 2  | 1  | 1  | 0  | 1  |
| 10162  | 0 | 1 | 2 | 2 | 3 | 1 | 2 | 1 | 2 | 2 | 1 | 0 | 1 | 1  | 2  | 1  | 1  | 0  | 1  |
| 10163  | 0 | 2 | 2 | 4 | 3 | 1 | 3 | 1 | 1 | 2 | 0 | 0 | 1 | 1  | 3  | 1  | 1  | 0  | 1  |
| 10164  | 1 | 4 | 2 | 5 | 3 | 5 | 3 | 2 | 1 | 2 | 1 | 1 | 1 | 1  | 1  | 6  | 0  | 1  | 1  |
| 10165  | 1 | 2 | 2 | 2 | 3 | 2 | 2 | 1 | 1 | 2 | 0 | 0 | 1 | 1  | 2  | 1  | 1  | 0  | 1  |
| 10166  | 1 | 5 | 2 | 2 | 3 | 2 | 2 | 1 | 1 | 2 | 1 | 1 | 1 | 1  | 2  | 1  | 1  | 0  | 1  |
| 10167  | 1 | 4 | 2 | 2 | 3 | 4 | 2 | 2 | 1 | 1 | 0 | 0 | 1 | 1  | 2  | 1  | 1  | 0  | 1  |

|        |   |   |   |   |   |   |   |   |   |   |   |   |   |    |    |    |    |    |    |
|--------|---|---|---|---|---|---|---|---|---|---|---|---|---|----|----|----|----|----|----|
| 10168  | 1 | 1 | 2 | 2 | 3 | 2 | 2 | 1 | 1 | 1 | 0 | 0 | 1 | 1  | 3  | 1  | 1  | 0  | 1  |
| 10169  | 0 | 3 | 2 | 2 | 3 | 1 | 2 | 1 | 1 | 1 | 0 | 0 | 1 | 1  | 3  | 2  | 1  | 0  | 1  |
| 101610 | 0 | 3 | 2 | 1 | 3 | 1 | 2 | 2 | 1 | 1 | 0 | 0 | 1 | 1  | 2  | 1  | 1  | 0  | 1  |
| 101611 | 0 | 1 | 2 | 2 | 3 | 1 | 2 | 2 | 1 | 1 | 0 | 0 | 1 | 1  | 2  | 6  | 1  | 1  | 1  |
| 101612 | 0 | 4 | 2 | 2 | 3 | 1 | 2 | 1 | 1 | 1 | 0 | 0 | 1 | 1  | 4  | 6  | 1  | 1  | 1  |
| 101613 | 1 | 3 | 2 | 2 | 3 | 4 | 2 | 1 | 1 | 1 | 0 | 0 | 1 | 1  | 2  | 1  | 1  | 0  | 1  |
| 101614 | 0 | 3 | 2 | 2 | 3 | 1 | 3 | 2 | 1 | 1 | 0 | 0 | 1 | 1  | 2  | 1  | 1  | 0  | 1  |
| 101615 | 0 | 4 | 2 | 2 | 3 | 1 | 2 | 1 | 1 | 1 | 0 | 0 | 1 | 1  | 3  | 1  | 1  | 0  | 1  |
| 101616 | 0 | 1 | 2 | 4 | 3 | 1 | 2 | 1 | 1 | 1 | 0 | 0 | 1 | 1  | 2  | 1  | 1  | 0  | 1  |
| 101617 | 0 | 3 | 2 | 1 | 3 | 1 | 2 | 2 | 1 | 1 | 0 | 0 | 1 | 1  | 2  | 1  | 1  | 0  | 1  |
| 101618 | 1 | 5 | 2 | 2 | 3 | 2 | 1 | 1 | 1 | 1 | 0 | 0 | 1 | 1  | 3  | 2  | 1  | 0  | 1  |
| 101619 | 1 | 4 | 2 | 2 | 3 | 4 | 2 | 2 | 1 | 1 | 0 | 0 | 1 | 1  | 3  | 6  | 1  | 1  | 1  |
| 101620 | 0 | 1 | 2 | 3 | 3 | 1 | 2 | 2 | 1 | 1 | 0 | 0 | 1 | 1  | 3  | 1  | 1  | 0  | 1  |
| 101621 | 1 | 4 | 2 | 2 | 3 | 4 | 2 | 1 | 1 | 1 | 0 | 0 | 1 | 1  | 2  | 1  | 1  | 0  | 1  |
| 101622 | 0 | 2 | 2 | 3 | 3 | 1 | 2 | 1 | 1 | 1 | 0 | 0 | 1 | 1  | 2  | 1  | 1  | 0  | 1  |
| 101623 | 1 | 1 | 2 | 2 | 3 | 4 | 2 | 1 | 1 | 1 | 0 | 0 | 1 | 1  | 3  | 1  | 1  | 0  | 1  |
| 101624 | 0 | 5 | 2 | 2 | 3 | 1 | 1 | 1 | 1 | 1 | 0 | 0 | 1 | 1  | 2  | 6  | 1  | 1  | 1  |
| 101625 | 1 | 2 | 2 | 3 | 1 | 2 | 2 | 1 | 1 | 1 | 0 | 0 | 1 | 1  | 3  | 1  | 1  | 0  | 1  |
| 101626 | 1 | 4 | 2 | 2 | 3 | 4 | 2 | 2 | 1 | 1 | 0 | 0 | 1 | 1  | 2  | 1  | 1  | 0  | 1  |
| 101627 | 1 | 3 | 2 | 2 | 3 | 4 | 2 | 1 | 1 | 1 | 0 | 0 | 1 | 1  | 2  | 1  | 1  | 0  | 1  |
| 101628 | 1 | 2 | 2 | 2 | 3 | 4 | 2 | 2 | 1 | 1 | 0 | 0 | 1 | 1  | 2  | 6  | 1  | 1  | 1  |
| 101629 | 1 | 3 | 2 | 3 | 3 | 4 | 2 | 1 | 1 | 1 | 0 | 0 | 1 | 1  | 2  | 1  | 1  | 0  | 1  |
| 101630 | 0 | 4 | 2 | 2 | 3 | 1 | 2 | 1 | 1 | 1 | 0 | 0 | 1 | 1  | 2  | 1  | 1  | 0  | 1  |
| 10271  | 0 | 3 | 2 | 1 | 3 | 1 | 2 | 2 | 1 | 1 | 0 | 0 | 1 | 1  | 3  | 4  | 1  | 1  | 1  |
| 10272  | 0 | 1 | 2 | 4 | 3 | 1 | 2 | 2 | 1 | 1 | 0 | 0 | 1 | 1  | 2  | 1  | 1  | 0  | 1  |
| 10273  | 0 | 2 | 2 | 2 | 3 | 1 | 2 | 2 | 1 | 3 | 0 | 0 | 1 | 1  | 3  | 1  | 1  | 0  | 1  |
| 10274  | 1 | 2 | 2 | 2 | 3 | 4 | 2 | 2 | 1 | 3 | 0 | 0 | 1 | 1  | 2  | 1  | 1  | 0  | 1  |
| 10275  | 0 | 4 | 2 | 2 | 3 | 1 | 1 | 1 | 1 | 3 | 0 | 0 | 1 | 1  | 1  | 5  | 0  | 1  | 1  |
| 10276  | 1 | 2 | 2 | 1 | 3 | 2 | 2 | 1 | 1 | 3 | 0 | 0 | 1 | 0  | 5  | 5  | 1  | 1  | 1  |
| 10277  | 0 | 1 | 2 | 3 | 3 | 1 | 2 | 2 | 1 | 3 | 0 | 0 | 1 | 1  | 3  | 6  | 1  | 1  | 1  |
| 10278  | 0 | 5 | 2 | 1 | 3 | 1 | 1 | 1 | 1 | 1 | 0 | 0 | 0 | 99 | 99 | 99 | 99 | 99 | 99 |
| 10279  | 1 | 4 | 2 | 2 | 3 | 2 | 2 | 2 | 1 | 3 | 0 | 0 | 1 | 1  | 1  | 1  | 0  | 0  | 0  |
| 102710 | 1 | 3 | 2 | 4 | 3 | 2 | 2 | 1 | 1 | 3 | 0 | 0 | 1 | 1  | 2  | 1  | 1  | 0  | 1  |
| 102711 | 1 | 4 | 2 | 1 | 3 | 2 | 2 | 1 | 1 | 3 | 0 | 0 | 1 | 1  | 4  | 4  | 1  | 1  | 1  |
| 102712 | 0 | 2 | 2 | 4 | 3 | 1 | 2 | 1 | 1 | 3 | 0 | 0 | 1 | 1  | 1  | 1  | 0  | 0  | 0  |
| 102713 | 0 | 4 | 2 | 2 | 3 | 1 | 2 | 1 | 1 | 3 | 0 | 0 | 0 | 99 | 99 | 99 | 99 | 99 | 99 |
| 102714 | 0 | 3 | 2 | 3 | 3 | 1 | 1 | 1 | 1 | 3 | 0 | 0 | 1 | 1  | 3  | 4  | 1  | 1  | 1  |
| 102715 | 1 | 5 | 2 | 1 | 3 | 2 | 1 | 1 | 1 | 3 | 0 | 0 | 0 | 99 | 99 | 99 | 99 | 99 | 99 |
| 102716 | 1 | 4 | 2 | 2 | 3 | 2 | 1 | 1 | 1 | 3 | 0 | 0 | 1 | 1  | 3  | 6  | 1  | 1  | 1  |
| 102717 | 0 | 4 | 2 | 2 | 3 | 1 | 1 | 1 | 1 | 3 | 0 | 0 | 0 | 99 | 99 | 99 | 99 | 99 | 99 |
| 102718 | 1 | 3 | 2 | 2 | 3 | 2 | 1 | 1 | 1 | 3 | 0 | 0 | 1 | 1  | 1  | 1  | 0  | 0  | 0  |
| 102719 | 0 | 4 | 2 | 1 | 3 | 2 | 1 | 1 | 1 | 3 | 0 | 0 | 1 | 1  | 2  | 5  | 1  | 1  | 1  |
| 102720 | 1 | 3 | 2 | 3 | 3 | 4 | 2 | 1 | 1 | 3 | 0 | 0 | 1 | 1  | 2  | 6  | 1  | 1  | 1  |
| 102721 | 1 | 4 | 2 | 2 | 3 | 2 | 2 | 1 | 1 | 3 | 0 | 0 | 1 | 1  | 1  | 1  | 0  | 0  | 0  |
| 102722 | 0 | 4 | 2 | 1 | 3 | 1 | 1 | 1 | 1 | 3 | 0 | 0 | 0 | 99 | 99 | 99 | 99 | 99 | 99 |
| 102723 | 0 | 2 | 2 | 2 | 3 | 1 | 1 | 1 | 1 | 3 | 0 | 0 | 1 | 1  | 3  | 5  | 1  | 1  | 1  |
| 102724 | 1 | 3 | 2 | 1 | 3 | 2 | 2 | 1 | 1 | 3 | 0 | 0 | 1 | 1  | 2  | 1  | 1  | 0  | 1  |
| 102725 | 0 | 2 | 2 | 2 | 3 | 1 | 1 | 2 | 1 | 3 | 0 | 0 | 1 | 1  | 4  | 1  | 1  | 0  | 1  |
| 102726 | 1 | 3 | 2 | 2 | 3 | 2 | 2 | 1 | 1 | 3 | 0 | 0 | 1 | 1  | 3  | 7  | 1  | 1  | 1  |
| 102727 | 1 | 2 | 2 | 2 | 3 | 2 | 2 | 1 | 1 | 2 | 0 | 0 | 1 | 1  | 1  | 1  | 0  | 0  | 0  |
| 102728 | 1 | 2 | 2 | 4 | 3 | 2 | 2 | 1 | 1 | 2 | 0 | 0 | 1 | 1  | 1  | 1  | 0  | 0  | 0  |
| 102729 | 1 | 2 | 2 | 3 | 3 | 4 | 2 | 2 | 1 | 3 | 0 | 0 | 1 | 1  | 2  | 6  | 1  | 1  | 1  |
| 102730 | 1 | 3 | 2 | 2 | 3 | 4 | 2 | 1 | 1 | 3 | 0 | 0 | 1 | 1  | 2  | 6  | 1  | 1  | 1  |
| 10281  | 1 | 3 | 2 | 2 | 3 | 2 | 2 | 1 | 1 | 4 | 0 | 0 | 1 | 1  | 2  | 6  | 1  | 1  | 1  |
| 10282  | 1 | 4 | 2 | 2 | 3 | 2 | 1 | 1 | 1 | 1 | 0 | 0 | 0 | 99 | 99 | 99 | 99 | 99 | 99 |
| 10283  | 0 | 4 | 2 | 1 | 3 | 1 | 1 | 1 | 1 | 4 | 0 | 0 | 1 | 1  | 3  | 5  | 1  | 1  | 1  |

|        |   |   |   |   |   |   |   |   |   |   |   |   |   |    |    |    |    |    |    |
|--------|---|---|---|---|---|---|---|---|---|---|---|---|---|----|----|----|----|----|----|
| 10284  | 1 | 3 | 2 | 1 | 3 | 1 | 2 | 1 | 1 | 4 | 0 | 0 | 1 | 1  | 2  | 5  | 1  | 1  | 1  |
| 10285  | 1 | 4 | 2 | 2 | 3 | 2 | 2 | 1 | 1 | 4 | 0 | 0 | 1 | 1  | 1  | 4  | 0  | 1  | 1  |
| 10286  | 0 | 3 | 2 | 2 | 3 | 1 | 1 | 1 | 1 | 4 | 0 | 0 | 1 | 1  | 2  | 4  | 1  | 1  | 1  |
| 10287  | 0 | 5 | 2 | 1 | 3 | 1 | 1 | 1 | 1 | 4 | 0 | 0 | 0 | 99 | 99 | 99 | 99 | 99 | 99 |
| 10288  | 1 | 5 | 2 | 1 | 3 | 2 | 1 | 1 | 1 | 4 | 0 | 0 | 0 | 99 | 99 | 99 | 99 | 99 | 99 |
| 10289  | 1 | 1 | 2 | 3 | 3 | 2 | 1 | 1 | 1 | 4 | 0 | 0 | 1 | 1  | 3  | 1  | 1  | 0  | 1  |
| 102810 | 0 | 3 | 2 | 2 | 3 | 1 | 1 | 1 | 1 | 4 | 0 | 0 | 1 | 1  | 2  | 1  | 1  | 0  | 1  |
| 102811 | 1 | 3 | 2 | 3 | 3 | 2 | 2 | 1 | 1 | 4 | 0 | 0 | 1 | 1  | 1  | 2  | 0  | 0  | 0  |
| 102812 | 1 | 3 | 2 | 3 | 3 | 2 | 2 | 1 | 1 | 4 | 0 | 0 | 1 | 1  | 1  | 1  | 0  | 0  | 0  |
| 102813 | 1 | 4 | 2 | 2 | 3 | 2 | 1 | 1 | 1 | 4 | 0 | 0 | 1 | 1  | 5  | 4  | 1  | 1  | 1  |
| 102814 | 0 | 3 | 2 | 2 | 3 | 1 | 1 | 1 | 1 | 4 | 0 | 0 | 0 | 99 | 99 | 99 | 99 | 99 | 99 |
| 102815 | 1 | 5 | 2 | 1 | 3 | 2 | 1 | 1 | 1 | 4 | 0 | 0 | 0 | 99 | 99 | 99 | 99 | 99 | 99 |
| 102816 | 1 | 3 | 2 | 2 | 3 | 2 | 1 | 1 | 1 | 4 | 0 | 0 | 1 | 1  | 1  | 1  | 0  | 0  | 0  |
| 102817 | 0 | 4 | 2 | 2 | 3 | 1 | 1 | 1 | 1 | 4 | 0 | 0 | 0 | 99 | 99 | 99 | 99 | 99 | 99 |
| 102818 | 0 | 4 | 2 | 2 | 3 | 1 | 1 | 1 | 1 | 4 | 0 | 0 | 1 | 1  | 2  | 1  | 1  | 0  | 1  |
| 102819 | 1 | 3 | 2 | 2 | 3 | 2 | 1 | 1 | 1 | 4 | 0 | 0 | 1 | 1  | 3  | 6  | 1  | 1  | 1  |
| 102820 | 0 | 2 | 2 | 3 | 3 | 1 | 1 | 1 | 1 | 4 | 0 | 0 | 1 | 1  | 3  | 1  | 1  | 0  | 1  |
| 102821 | 1 | 2 | 2 | 3 | 3 | 2 | 3 | 1 | 1 | 1 | 0 | 0 | 1 | 1  | 2  | 1  | 1  | 0  | 1  |
| 102822 | 0 | 3 | 2 | 2 | 3 | 1 | 2 | 2 | 1 | 1 | 0 | 0 | 1 | 1  | 2  | 5  | 1  | 1  | 1  |
| 102823 | 0 | 3 | 2 | 2 | 3 | 1 | 3 | 1 | 1 | 1 | 0 | 0 | 1 | 1  | 1  | 1  | 0  | 0  | 0  |
| 102824 | 1 | 4 | 2 | 1 | 3 | 2 | 2 | 1 | 1 | 1 | 0 | 0 | 0 | 99 | 99 | 99 | 99 | 99 | 99 |
| 102825 | 1 | 4 | 2 | 2 | 3 | 2 | 2 | 1 | 1 | 1 | 0 | 0 | 1 | 1  | 1  | 1  | 0  | 0  | 0  |
| 102826 | 0 | 4 | 2 | 2 | 3 | 1 | 2 | 1 | 1 | 1 | 0 | 0 | 1 | 1  | 1  | 1  | 0  | 0  | 0  |
| 102827 | 0 | 5 | 2 | 2 | 3 | 1 | 3 | 1 | 1 | 1 | 0 | 0 | 1 | 1  | 1  | 1  | 0  | 0  | 0  |
| 102828 | 0 | 2 | 2 | 2 | 3 | 1 | 3 | 1 | 1 | 1 | 0 | 0 | 1 | 1  | 1  | 1  | 0  | 0  | 0  |
| 102829 | 1 | 5 | 2 | 1 | 3 | 2 | 3 | 1 | 1 | 1 | 0 | 0 | 1 | 1  | 1  | 1  | 0  | 0  | 0  |
| 102830 | 0 | 1 | 2 | 3 | 3 | 1 | 2 | 1 | 1 | 1 | 0 | 0 | 1 | 1  | 1  | 1  | 0  | 0  | 0  |
| 10291  | 1 | 5 | 2 | 2 | 3 | 2 | 2 | 1 | 1 | 2 | 0 | 0 | 1 | 1  | 1  | 6  | 0  | 1  | 1  |
| 10292  | 0 | 4 | 2 | 2 | 3 | 1 | 2 | 1 | 1 | 2 | 0 | 0 | 0 | 99 | 99 | 99 | 99 | 99 | 99 |
| 10293  | 0 | 5 | 2 | 1 | 3 | 1 | 2 | 1 | 1 | 2 | 0 | 0 | 0 | 99 | 99 | 99 | 99 | 99 | 99 |
| 10294  | 1 | 1 | 2 | 3 | 3 | 2 | 2 | 1 | 1 | 2 | 0 | 0 | 1 | 1  | 1  | 1  | 0  | 0  | 0  |
| 10295  | 1 | 2 | 2 | 3 | 3 | 2 | 2 | 1 | 1 | 2 | 0 | 0 | 1 | 1  | 1  | 5  | 0  | 1  | 1  |
| 10296  | 1 | 5 | 2 | 2 | 3 | 2 | 3 | 2 | 1 | 2 | 0 | 0 | 1 | 1  | 3  | 1  | 1  | 0  | 1  |
| 10297  | 1 | 3 | 2 | 2 | 3 | 2 | 2 | 1 | 1 | 2 | 0 | 0 | 0 | 99 | 99 | 99 | 99 | 99 | 99 |
| 10298  | 0 | 1 | 2 | 4 | 3 | 1 | 3 | 1 | 1 | 2 | 0 | 0 | 1 | 1  | 2  | 1  | 1  | 0  | 1  |
| 10299  | 1 | 4 | 2 | 2 | 3 | 2 | 2 | 1 | 1 | 2 | 0 | 0 | 1 | 1  | 3  | 5  | 1  | 1  | 1  |
| 102910 | 0 | 3 | 2 | 2 | 3 | 1 | 2 | 2 | 1 | 2 | 0 | 0 | 1 | 1  | 1  | 1  | 0  | 0  | 0  |
| 102911 | 1 | 3 | 2 | 3 | 3 | 2 | 2 | 1 | 1 | 2 | 0 | 0 | 1 | 1  | 3  | 1  | 1  | 0  | 1  |
| 102912 | 0 | 1 | 2 | 3 | 3 | 1 | 2 | 1 | 1 | 2 | 0 | 0 | 1 | 1  | 2  | 5  | 1  | 1  | 1  |
| 102913 | 1 | 3 | 2 | 2 | 3 | 2 | 2 | 1 | 1 | 2 | 0 | 0 | 1 | 1  | 3  | 1  | 1  | 0  | 1  |
| 102914 | 0 | 4 | 2 | 2 | 3 | 1 | 2 | 1 | 1 | 2 | 0 | 0 | 1 | 1  | 1  | 1  | 0  | 0  | 0  |
| 102915 | 0 | 4 | 2 | 1 | 3 | 1 | 2 | 1 | 1 | 2 | 0 | 0 | 1 | 1  | 2  | 1  | 1  | 0  | 1  |
| 102916 | 1 | 4 | 2 | 2 | 3 | 2 | 2 | 1 | 1 | 2 | 0 | 0 | 0 | 99 | 99 | 99 | 99 | 99 | 99 |
| 102917 | 1 | 3 | 2 | 2 | 3 | 2 | 2 | 1 | 1 | 2 | 0 | 0 | 1 | 1  | 1  | 5  | 0  | 1  | 1  |
| 102918 | 0 | 4 | 2 | 2 | 3 | 1 | 2 | 1 | 1 | 2 | 0 | 0 | 0 | 99 | 99 | 99 | 99 | 99 | 99 |
| 102919 | 0 | 4 | 2 | 2 | 3 | 1 | 2 | 1 | 1 | 2 | 0 | 0 | 0 | 99 | 99 | 99 | 99 | 99 | 99 |
| 102920 | 0 | 1 | 2 | 3 | 3 | 1 | 2 | 1 | 1 | 2 | 0 | 0 | 1 | 1  | 3  | 1  | 1  | 0  | 1  |
| 102921 | 0 | 1 | 2 | 2 | 3 | 1 | 2 | 1 | 1 | 2 | 0 | 0 | 1 | 1  | 2  | 1  | 1  | 0  | 1  |
| 102922 | 1 | 3 | 2 | 2 | 3 | 2 | 2 | 1 | 1 | 2 | 0 | 0 | 1 | 1  | 3  | 5  | 1  | 1  | 1  |
| 102923 | 1 | 3 | 2 | 2 | 3 | 2 | 2 | 1 | 1 | 2 | 0 | 0 | 1 | 1  | 1  | 1  | 0  | 0  | 0  |
| 102924 | 1 | 2 | 2 | 3 | 3 | 2 | 2 | 1 | 1 | 2 | 0 | 0 | 0 | 99 | 99 | 99 | 99 | 99 | 99 |
| 102925 | 0 | 2 | 2 | 4 | 3 | 1 | 3 | 1 | 1 | 2 | 0 | 0 | 1 | 1  | 2  | 1  | 1  | 0  | 1  |
| 102926 | 1 | 3 | 2 | 2 | 3 | 2 | 2 | 1 | 1 | 2 | 0 | 0 | 1 | 1  | 3  | 1  | 1  | 0  | 1  |
| 102927 | 1 | 3 | 2 | 2 | 3 | 2 | 2 | 1 | 1 | 2 | 0 | 0 | 0 | 99 | 99 | 99 | 99 | 99 | 99 |
| 102928 | 0 | 4 | 2 | 3 | 3 | 1 | 2 | 1 | 1 | 2 | 0 | 0 | 1 | 1  | 2  | 5  | 1  | 1  | 1  |
| 102929 | 0 | 4 | 2 | 2 | 3 | 1 | 2 | 1 | 1 | 2 | 0 | 0 | 1 | 1  | 2  | 6  | 1  | 1  | 1  |

|         |   |   |   |   |   |   |   |   |   |   |   |   |   |    |    |    |    |    |    |
|---------|---|---|---|---|---|---|---|---|---|---|---|---|---|----|----|----|----|----|----|
| 102930  | 1 | 4 | 2 | 2 | 3 | 2 | 2 | 1 | 1 | 2 | 0 | 0 | 1 | 1  | 2  | 5  | 1  | 1  | 1  |
| 102101  | 0 | 1 | 2 | 4 | 3 | 1 | 2 | 2 | 1 | 1 | 0 | 0 | 1 | 1  | 1  | 1  | 0  | 0  | 0  |
| 102102  | 0 | 2 | 2 | 3 | 3 | 1 | 2 | 1 | 1 | 1 | 0 | 0 | 1 | 1  | 3  | 1  | 1  | 0  | 1  |
| 102103  | 0 | 2 | 2 | 2 | 3 | 1 | 2 | 2 | 2 | 1 | 0 | 0 | 1 | 1  | 3  | 1  | 1  | 0  | 1  |
| 102104  | 0 | 5 | 2 | 1 | 3 | 2 | 2 | 2 | 1 | 1 | 0 | 0 | 1 | 1  | 3  | 1  | 1  | 0  | 1  |
| 102105  | 1 | 5 | 2 | 3 | 3 | 2 | 3 | 2 | 1 | 1 | 0 | 0 | 1 | 1  | 1  | 1  | 0  | 0  | 0  |
| 102106  | 1 | 4 | 2 | 1 | 3 | 2 | 2 | 2 | 4 | 2 | 0 | 0 | 1 | 1  | 3  | 1  | 1  | 0  | 1  |
| 102107  | 0 | 1 | 2 | 4 | 3 | 1 | 2 | 1 | 4 | 1 | 0 | 0 | 1 | 1  | 3  | 1  | 1  | 0  | 1  |
| 102108  | 0 | 2 | 2 | 2 | 3 | 1 | 2 | 2 | 1 | 1 | 0 | 0 | 1 | 1  | 3  | 1  | 1  | 0  | 1  |
| 102109  | 1 | 3 | 2 | 2 | 3 | 2 | 3 | 1 | 1 | 1 | 0 | 0 | 1 | 1  | 3  | 1  | 1  | 0  | 1  |
| 1021010 | 0 | 3 | 2 | 2 | 3 | 1 | 2 | 1 | 1 | 1 | 0 | 0 | 1 | 1  | 3  | 1  | 1  | 0  | 1  |
| 1021011 | 1 | 4 | 2 | 1 | 2 | 2 | 2 | 1 | 1 | 1 | 0 | 0 | 1 | 1  | 3  | 1  | 1  | 0  | 1  |
| 1021012 | 0 | 1 | 2 | 2 | 3 | 1 | 3 | 1 | 1 | 1 | 0 | 0 | 1 | 1  | 3  | 1  | 1  | 0  | 1  |
| 1021013 | 0 | 5 | 2 | 1 | 3 | 2 | 2 | 1 | 4 | 1 | 0 | 0 | 1 | 1  | 4  | 5  | 1  | 1  | 1  |
| 1021014 | 0 | 2 | 2 | 2 | 3 | 1 | 2 | 1 | 1 | 1 | 0 | 0 | 1 | 1  | 3  | 1  | 1  | 0  | 1  |
| 1021015 | 1 | 5 | 2 | 1 | 3 | 2 | 2 | 1 | 1 | 1 | 0 | 0 | 1 | 1  | 1  | 1  | 0  | 0  | 0  |
| 1021016 | 1 | 4 | 2 | 2 | 3 | 2 | 2 | 2 | 4 | 1 | 0 | 0 | 1 | 1  | 3  | 1  | 1  | 0  | 1  |
| 1021017 | 1 | 2 | 2 | 3 | 3 | 4 | 2 | 2 | 2 | 4 | 0 | 0 | 1 | 1  | 3  | 1  | 1  | 0  | 1  |
| 1021018 | 1 | 2 | 2 | 1 | 3 | 2 | 2 | 2 | 1 | 1 | 0 | 0 | 1 | 1  | 3  | 1  | 1  | 0  | 1  |
| 1021019 | 1 | 4 | 2 | 1 | 3 | 2 | 2 | 1 | 1 | 1 | 0 | 0 | 1 | 1  | 3  | 1  | 1  | 0  | 1  |
| 1021020 | 1 | 5 | 2 | 2 | 2 | 2 | 2 | 1 | 1 | 1 | 0 | 0 | 1 | 0  | 5  | 5  | 1  | 1  | 1  |
| 1021021 | 1 | 4 | 2 | 1 | 3 | 2 | 2 | 1 | 1 | 1 | 0 | 0 | 1 | 1  | 3  | 2  | 1  | 0  | 1  |
| 1021022 | 1 | 3 | 2 | 1 | 3 | 2 | 2 | 1 | 1 | 1 | 0 | 0 | 0 | 99 | 99 | 99 | 99 | 99 | 99 |
| 1021023 | 1 | 4 | 2 | 2 | 3 | 5 | 3 | 2 | 4 | 1 | 1 | 0 | 1 | 1  | 4  | 1  | 1  | 0  | 1  |
| 1021024 | 1 | 3 | 2 | 1 | 3 | 2 | 2 | 1 | 1 | 1 | 0 | 0 | 1 | 1  | 3  | 1  | 1  | 0  | 1  |
| 1021025 | 1 | 4 | 2 | 2 | 3 | 5 | 2 | 2 | 4 | 2 | 0 | 0 | 1 | 1  | 3  | 1  | 1  | 0  | 1  |
| 1021026 | 1 | 4 | 2 | 2 | 3 | 2 | 2 | 1 | 1 | 1 | 0 | 0 | 1 | 1  | 3  | 1  | 1  | 0  | 1  |
| 1021027 | 0 | 5 | 2 | 1 | 3 | 2 | 1 | 1 | 1 | 1 | 0 | 0 | 1 | 0  | 5  | 5  | 1  | 1  | 1  |
| 1021028 | 0 | 5 | 2 | 1 | 3 | 2 | 2 | 2 | 4 | 2 | 0 | 0 | 1 | 1  | 1  | 1  | 0  | 0  | 0  |
| 1021029 | 0 | 5 | 2 | 1 | 3 | 2 | 2 | 1 | 1 | 1 | 0 | 0 | 1 | 1  | 1  | 1  | 0  | 0  | 0  |
| 1021030 | 0 | 5 | 2 | 2 | 3 | 2 | 3 | 2 | 1 | 1 | 0 | 0 | 1 | 1  | 1  | 1  | 0  | 0  | 0  |
| 1021031 | 0 | 2 | 2 | 3 | 3 | 1 | 2 | 1 | 2 | 4 | 0 | 0 | 1 | 1  | 3  | 1  | 1  | 0  | 1  |
| 1021032 | 0 | 2 | 2 | 4 | 3 | 1 | 3 | 2 | 4 | 1 | 0 | 0 | 1 | 1  | 3  | 1  | 1  | 0  | 1  |
| 1021033 | 0 | 2 | 2 | 3 | 3 | 1 | 2 | 1 | 1 | 1 | 0 | 0 | 1 | 1  | 1  | 1  | 0  | 0  | 0  |
| 102111  | 0 | 3 | 2 | 2 | 3 | 2 | 1 | 1 | 2 | 1 | 0 | 0 | 0 | 99 | 99 | 99 | 99 | 99 | 99 |
| 102112  | 1 | 3 | 2 | 2 | 3 | 3 | 2 | 1 | 1 | 1 | 0 | 0 | 1 | 1  | 3  | 1  | 1  | 0  | 1  |
| 102113  | 0 | 4 | 2 | 1 | 3 | 2 | 2 | 1 | 2 | 1 | 0 | 0 | 1 | 1  | 2  | 1  | 1  | 0  | 1  |
| 102114  | 0 | 3 | 2 | 3 | 3 | 1 | 2 | 1 | 4 | 3 | 0 | 0 | 1 | 1  | 4  | 1  | 1  | 0  | 1  |
| 102115  | 1 | 2 | 2 | 2 | 3 | 4 | 2 | 1 | 4 | 3 | 0 | 0 | 1 | 1  | 1  | 1  | 0  | 0  | 0  |
| 102116  | 0 | 2 | 2 | 2 | 2 | 1 | 2 | 2 | 4 | 3 | 0 | 0 | 1 | 1  | 3  | 1  | 1  | 0  | 1  |
| 102117  | 1 | 2 | 2 | 5 | 3 | 5 | 3 | 1 | 4 | 1 | 1 | 0 | 1 | 1  | 1  | 1  | 0  | 0  | 0  |
| 102118  | 1 | 1 | 2 | 3 | 3 | 5 | 2 | 2 | 4 | 4 | 0 | 0 | 1 | 1  | 2  | 5  | 1  | 1  | 1  |
| 102119  | 1 | 5 | 2 | 4 | 3 | 4 | 2 | 1 | 2 | 1 | 0 | 0 | 1 | 1  | 1  | 1  | 0  | 0  | 0  |
| 1021110 | 0 | 4 | 2 | 1 | 3 | 2 | 2 | 1 | 4 | 2 | 0 | 0 | 0 | 99 | 99 | 99 | 99 | 99 | 99 |
| 1021111 | 1 | 2 | 2 | 4 | 3 | 4 | 2 | 1 | 4 | 2 | 0 | 0 | 1 | 0  | 5  | 5  | 1  | 1  | 1  |
| 1021112 | 1 | 2 | 2 | 3 | 3 | 2 | 2 | 1 | 4 | 2 | 0 | 0 | 1 | 1  | 1  | 1  | 0  | 0  | 0  |
| 1021113 | 1 | 1 | 2 | 1 | 2 | 4 | 2 | 1 | 2 | 1 | 0 | 0 | 1 | 0  | 5  | 5  | 1  | 1  | 1  |
| 1021114 | 0 | 3 | 2 | 1 | 3 | 2 | 1 | 1 | 2 | 1 | 0 | 0 | 1 | 0  | 5  | 5  | 1  | 1  | 1  |
| 1021115 | 0 | 3 | 2 | 2 | 3 | 1 | 2 | 1 | 2 | 1 | 0 | 0 | 1 | 1  | 3  | 1  | 1  | 0  | 1  |
| 1021116 | 0 | 3 | 2 | 2 | 3 | 1 | 2 | 2 | 1 | 1 | 0 | 0 | 1 | 0  | 5  | 5  | 1  | 1  | 1  |
| 1021117 | 1 | 5 | 2 | 2 | 2 | 5 | 2 | 1 | 4 | 3 | 1 | 1 | 1 | 1  | 1  | 1  | 0  | 0  | 0  |
| 1021118 | 0 | 4 | 2 | 2 | 3 | 1 | 2 | 1 | 4 | 3 | 0 | 0 | 1 | 1  | 1  | 1  | 0  | 0  | 0  |
| 1021119 | 0 | 4 | 2 | 2 | 3 | 1 | 2 | 2 | 4 | 3 | 0 | 0 | 1 | 1  | 1  | 1  | 0  | 0  | 0  |
| 1021120 | 1 | 3 | 2 | 1 | 3 | 2 | 2 | 2 | 4 | 2 | 0 | 0 | 1 | 1  | 4  | 1  | 1  | 0  | 1  |
| 1021121 | 1 | 5 | 2 | 1 | 3 | 2 | 1 | 1 | 4 | 1 | 0 | 0 | 0 | 99 | 99 | 99 | 99 | 99 | 99 |
| 1021122 | 1 | 5 | 2 | 1 | 3 | 2 | 3 | 2 | 4 | 2 | 0 | 0 | 1 | 1  | 3  | 1  | 1  | 0  | 1  |

|         |   |   |   |   |   |   |   |   |   |   |   |   |   |    |    |    |    |    |    |
|---------|---|---|---|---|---|---|---|---|---|---|---|---|---|----|----|----|----|----|----|
| 1021123 | 0 | 5 | 2 | 2 | 3 | 2 | 1 | 1 | 4 | 3 | 0 | 0 | 1 | 0  | 5  | 5  | 1  | 1  | 1  |
| 1021124 | 1 | 4 | 2 | 1 | 3 | 4 | 2 | 2 | 4 | 4 | 0 | 0 | 1 | 1  | 2  | 1  | 1  | 0  | 1  |
| 1021125 | 1 | 2 | 2 | 3 | 3 | 4 | 3 | 1 | 4 | 2 | 0 | 0 | 1 | 1  | 3  | 1  | 1  | 0  | 1  |
| 1021126 | 0 | 4 | 2 | 2 | 3 | 5 | 3 | 2 | 4 | 3 | 0 | 0 | 1 | 1  | 3  | 1  | 1  | 0  | 1  |
| 1021127 | 1 | 3 | 2 | 1 | 3 | 4 | 2 | 1 | 4 | 2 | 0 | 0 | 1 | 1  | 1  | 1  | 0  | 0  | 0  |
| 1021128 | 1 | 3 | 2 | 4 | 3 | 5 | 3 | 2 | 4 | 1 | 0 | 0 | 1 | 1  | 1  | 1  | 0  | 0  | 0  |
| 1021129 | 1 | 3 | 2 | 4 | 3 | 5 | 3 | 2 | 4 | 1 | 0 | 0 | 1 | 1  | 3  | 1  | 1  | 0  | 1  |
| 1021130 | 1 | 3 | 2 | 4 | 3 | 5 | 3 | 1 | 4 | 3 | 0 | 0 | 1 | 1  | 1  | 1  | 0  | 0  | 0  |
| 1021131 | 0 | 2 | 2 | 4 | 3 | 5 | 2 | 1 | 4 | 3 | 0 | 0 | 1 | 1  | 1  | 1  | 0  | 0  | 0  |
| 1021132 | 0 | 3 | 2 | 4 | 3 | 1 | 3 | 2 | 4 | 2 | 0 | 0 | 1 | 1  | 3  | 1  | 1  | 0  | 1  |
| 1021133 | 0 | 4 | 2 | 2 | 3 | 5 | 3 | 1 | 4 | 3 | 0 | 0 | 1 | 1  | 1  | 1  | 0  | 0  | 0  |
| 1021134 | 1 | 4 | 2 | 4 | 3 | 5 | 3 | 2 | 4 | 2 | 0 | 0 | 1 | 1  | 1  | 1  | 0  | 0  | 0  |
| 1021135 | 1 | 2 | 2 | 5 | 2 | 5 | 3 | 1 | 4 | 2 | 0 | 0 | 1 | 1  | 1  | 1  | 0  | 0  | 0  |
| 1021136 | 0 | 2 | 2 | 4 | 3 | 1 | 2 | 2 | 4 | 4 | 0 | 0 | 1 | 1  | 1  | 1  | 0  | 0  | 0  |
| 1021137 | 0 | 5 | 2 | 2 | 3 | 2 | 2 | 2 | 4 | 3 | 0 | 0 | 1 | 1  | 1  | 1  | 0  | 0  | 0  |
| 1021138 | 1 | 2 | 2 | 5 | 2 | 5 | 3 | 1 | 4 | 2 | 0 | 0 | 1 | 1  | 1  | 1  | 0  | 0  | 0  |
| 1021139 | 0 | 4 | 2 | 2 | 3 | 1 | 2 | 1 | 4 | 2 | 0 | 0 | 1 | 1  | 1  | 1  | 0  | 0  | 0  |
| 102121  | 0 | 5 | 2 | 1 | 3 | 2 | 2 | 1 | 2 | 1 | 0 | 0 | 0 | 99 | 99 | 99 | 99 | 99 | 99 |
| 102122  | 0 | 4 | 2 | 2 | 3 | 2 | 3 | 1 | 1 | 1 | 0 | 0 | 1 | 1  | 1  | 1  | 0  | 0  | 0  |
| 102123  | 1 | 5 | 2 | 5 | 2 | 5 | 3 | 1 | 2 | 1 | 0 | 0 | 1 | 1  | 1  | 1  | 0  | 0  | 0  |
| 102124  | 1 | 4 | 2 | 1 | 3 | 2 | 2 | 1 | 1 | 1 | 0 | 0 | 0 | 99 | 99 | 99 | 99 | 99 | 99 |
| 102125  | 0 | 3 | 2 | 3 | 3 | 1 | 2 | 2 | 4 | 1 | 0 | 0 | 1 | 1  | 3  | 1  | 1  | 0  | 1  |
| 102126  | 1 | 3 | 2 | 2 | 3 | 2 | 2 | 1 | 2 | 1 | 0 | 0 | 1 | 1  | 3  | 6  | 1  | 1  | 1  |
| 102127  | 0 | 3 | 2 | 1 | 3 | 1 | 2 | 2 | 1 | 1 | 0 | 0 | 1 | 1  | 3  | 1  | 1  | 0  | 1  |
| 102128  | 1 | 3 | 2 | 3 | 3 | 2 | 3 | 1 | 4 | 1 | 0 | 0 | 1 | 1  | 3  | 1  | 1  | 0  | 1  |
| 102129  | 0 | 1 | 2 | 4 | 3 | 1 | 3 | 1 | 4 | 1 | 0 | 0 | 1 | 1  | 3  | 1  | 1  | 0  | 1  |
| 1021210 | 1 | 3 | 2 | 2 | 3 | 2 | 3 | 2 | 2 | 1 | 0 | 0 | 1 | 1  | 1  | 1  | 0  | 0  | 0  |
| 1021211 | 0 | 1 | 2 | 5 | 3 | 5 | 3 | 1 | 2 | 3 | 0 | 0 | 1 | 1  | 1  | 1  | 0  | 0  | 0  |
| 1021212 | 1 | 2 | 2 | 2 | 3 | 2 | 3 | 2 | 2 | 3 | 0 | 0 | 1 | 1  | 2  | 1  | 1  | 0  | 1  |
| 1021213 | 0 | 5 | 2 | 2 | 3 | 1 | 2 | 2 | 2 | 2 | 0 | 0 | 1 | 1  | 1  | 1  | 0  | 0  | 0  |
| 1021214 | 0 | 4 | 2 | 2 | 3 | 1 | 2 | 2 | 2 | 2 | 0 | 0 | 1 | 1  | 4  | 1  | 1  | 0  | 1  |
| 1021215 | 0 | 4 | 2 | 2 | 3 | 1 | 2 | 2 | 2 | 2 | 0 | 0 | 1 | 1  | 4  | 1  | 1  | 0  | 1  |
| 1021216 | 1 | 5 | 2 | 1 | 3 | 2 | 2 | 2 | 2 | 2 | 0 | 0 | 1 | 1  | 3  | 5  | 1  | 1  | 1  |
| 1021217 | 0 | 4 | 2 | 2 | 3 | 1 | 2 | 1 | 2 | 1 | 0 | 0 | 1 | 1  | 4  | 1  | 1  | 0  | 1  |
| 1021218 | 1 | 1 | 2 | 3 | 3 | 4 | 3 | 1 | 2 | 1 | 0 | 0 | 1 | 1  | 3  | 5  | 1  | 1  | 1  |
| 1021219 | 1 | 3 | 2 | 3 | 3 | 2 | 2 | 2 | 2 | 1 | 0 | 0 | 1 | 1  | 1  | 5  | 0  | 1  | 1  |
| 1021220 | 1 | 4 | 2 | 2 | 3 | 2 | 2 | 1 | 2 | 1 | 0 | 0 | 1 | 0  | 5  | 5  | 1  | 1  | 1  |
| 1021221 | 1 | 5 | 2 | 2 | 3 | 2 | 3 | 1 | 1 | 1 | 0 | 0 | 1 | 1  | 1  | 1  | 0  | 0  | 0  |
| 1021222 | 0 | 4 | 2 | 1 | 3 | 1 | 2 | 2 | 2 | 2 | 0 | 0 | 1 | 1  | 1  | 1  | 0  | 0  | 0  |
| 1021223 | 1 | 2 | 2 | 5 | 3 | 5 | 3 | 1 | 4 | 1 | 0 | 0 | 1 | 1  | 2  | 1  | 1  | 0  | 1  |
| 1021224 | 0 | 4 | 2 | 5 | 3 | 5 | 3 | 2 | 4 | 1 | 1 | 1 | 1 | 1  | 2  | 1  | 1  | 0  | 1  |
| 1021225 | 0 | 5 | 2 | 2 | 3 | 1 | 2 | 2 | 2 | 1 | 0 | 0 | 1 | 1  | 2  | 1  | 1  | 0  | 1  |
| 1021226 | 0 | 4 | 2 | 1 | 3 | 1 | 2 | 1 | 2 | 2 | 0 | 0 | 1 | 0  | 5  | 5  | 1  | 1  | 1  |
| 1021227 | 1 | 2 | 2 | 1 | 3 | 4 | 2 | 1 | 2 | 2 | 0 | 0 | 1 | 1  | 1  | 1  | 0  | 0  | 0  |
| 1021228 | 1 | 5 | 2 | 1 | 3 | 2 | 2 | 2 | 2 | 1 | 0 | 0 | 1 | 0  | 5  | 5  | 1  | 1  | 1  |
| 1021229 | 0 | 2 | 2 | 2 | 4 | 1 | 2 | 2 | 4 | 1 | 0 | 0 | 1 | 1  | 3  | 1  | 1  | 0  | 1  |
| 1021230 | 1 | 2 | 2 | 2 | 3 | 2 | 2 | 2 | 2 | 1 | 0 | 0 | 1 | 1  | 4  | 1  | 1  | 0  | 1  |
| 1021231 | 1 | 3 | 2 | 1 | 3 | 4 | 2 | 2 | 2 | 1 | 0 | 0 | 1 | 1  | 3  | 1  | 1  | 0  | 1  |
| 1021232 | 1 | 4 | 2 | 1 | 2 | 4 | 2 | 1 | 2 | 1 | 0 | 0 | 1 | 0  | 5  | 5  | 1  | 1  | 1  |
| 1021233 | 1 | 1 | 2 | 5 | 3 | 3 | 3 | 1 | 2 | 1 | 1 | 1 | 1 | 1  | 2  | 1  | 1  | 0  | 1  |
| 1021234 | 0 | 5 | 2 | 1 | 2 | 1 | 2 | 2 | 4 | 2 | 0 | 0 | 1 | 1  | 1  | 1  | 0  | 0  | 0  |
| 1021235 | 0 | 2 | 2 | 5 | 3 | 5 | 2 | 2 | 4 | 2 | 0 | 0 | 1 | 1  | 1  | 1  | 0  | 0  | 0  |
| 103141  | 1 | 4 | 2 | 3 | 3 | 2 | 2 | 1 | 2 | 1 | 1 | 1 | 0 | 99 | 99 | 99 | 99 | 99 | 99 |
| 103142  | 1 | 2 | 2 | 3 | 3 | 2 | 2 | 2 | 2 | 1 | 0 | 0 | 0 | 99 | 99 | 99 | 99 | 99 | 99 |
| 103143  | 1 | 5 | 2 | 3 | 3 | 2 | 2 | 2 | 2 | 1 | 1 | 0 | 0 | 99 | 99 | 99 | 99 | 99 | 99 |
| 103144  | 1 | 3 | 2 | 3 | 3 | 2 | 2 | 2 | 2 | 1 | 0 | 0 | 1 | 1  | 1  | 1  | 0  | 0  | 0  |

|         |   |   |   |   |   |   |   |   |   |   |   |   |   |    |    |    |    |    |    |
|---------|---|---|---|---|---|---|---|---|---|---|---|---|---|----|----|----|----|----|----|
| 103145  | 1 | 3 | 2 | 3 | 3 | 2 | 2 | 1 | 2 | 1 | 0 | 0 | 0 | 99 | 99 | 99 | 99 | 99 | 99 |
| 103146  | 1 | 5 | 2 | 1 | 3 | 2 | 2 | 1 | 2 | 1 | 0 | 0 | 0 | 99 | 99 | 99 | 99 | 99 | 99 |
| 103147  | 1 | 5 | 2 | 1 | 3 | 2 | 1 | 2 | 2 | 1 | 0 | 0 | 0 | 99 | 99 | 99 | 99 | 99 | 99 |
| 103148  | 1 | 4 | 2 | 3 | 3 | 2 | 2 | 2 | 2 | 1 | 0 | 0 | 0 | 99 | 99 | 99 | 99 | 99 | 99 |
| 103149  | 1 | 3 | 2 | 2 | 3 | 2 | 2 | 2 | 2 | 1 | 1 | 0 | 0 | 99 | 99 | 99 | 99 | 99 | 99 |
| 1031410 | 1 | 4 | 2 | 4 | 3 | 2 | 2 | 1 | 2 | 1 | 0 | 0 | 1 | 1  | 1  | 1  | 0  | 0  | 0  |
| 1031411 | 0 | 5 | 2 | 2 | 3 | 1 | 2 | 1 | 3 | 1 | 1 | 1 | 0 | 99 | 99 | 99 | 99 | 99 | 99 |
| 1031412 | 0 | 3 | 2 | 2 | 3 | 1 | 1 | 1 | 3 | 1 | 0 | 0 | 0 | 99 | 99 | 99 | 99 | 99 | 99 |
| 1031413 | 0 | 4 | 2 | 1 | 3 | 1 | 2 | 1 | 3 | 1 | 0 | 0 | 0 | 99 | 99 | 99 | 99 | 99 | 99 |
| 1031414 | 0 | 3 | 2 | 2 | 3 | 1 | 2 | 1 | 3 | 1 | 0 | 0 | 0 | 99 | 99 | 99 | 99 | 99 | 99 |
| 1031415 | 0 | 3 | 2 | 1 | 3 | 1 | 2 | 1 | 3 | 1 | 0 | 0 | 1 | 1  | 1  | 1  | 0  | 0  | 0  |
| 1031416 | 0 | 3 | 2 | 2 | 3 | 1 | 2 | 1 | 3 | 1 | 0 | 0 | 0 | 99 | 99 | 99 | 99 | 99 | 99 |
| 1031417 | 0 | 5 | 2 | 2 | 3 | 1 | 1 | 1 | 3 | 1 | 0 | 0 | 0 | 99 | 99 | 99 | 99 | 99 | 99 |
| 1031418 | 0 | 5 | 2 | 2 | 3 | 1 | 2 | 2 | 3 | 1 | 0 | 0 | 0 | 99 | 99 | 99 | 99 | 99 | 99 |
| 1031419 | 0 | 4 | 2 | 2 | 3 | 1 | 1 | 1 | 3 | 1 | 0 | 0 | 0 | 99 | 99 | 99 | 99 | 99 | 99 |
| 1031420 | 0 | 5 | 2 | 2 | 3 | 1 | 2 | 2 | 3 | 1 | 0 | 0 | 0 | 99 | 99 | 99 | 99 | 99 | 99 |
| 1031421 | 0 | 4 | 2 | 2 | 3 | 1 | 1 | 1 | 3 | 1 | 0 | 0 | 0 | 99 | 99 | 99 | 99 | 99 | 99 |
| 1031422 | 0 | 4 | 2 | 2 | 3 | 1 | 1 | 1 | 3 | 1 | 0 | 0 | 0 | 99 | 99 | 99 | 99 | 99 | 99 |
| 1031423 | 0 | 1 | 2 | 2 | 3 | 1 | 1 | 1 | 3 | 1 | 0 | 0 | 1 | 1  | 1  | 1  | 0  | 0  | 0  |
| 1031424 | 0 | 4 | 2 | 1 | 3 | 1 | 2 | 2 | 3 | 1 | 0 | 0 | 0 | 99 | 99 | 99 | 99 | 99 | 99 |
| 1031425 | 1 | 4 | 2 | 1 | 3 | 2 | 1 | 1 | 3 | 1 | 0 | 0 | 0 | 99 | 99 | 99 | 99 | 99 | 99 |
| 1031426 | 0 | 2 | 2 | 2 | 3 | 1 | 1 | 1 | 3 | 1 | 0 | 0 | 0 | 99 | 99 | 99 | 99 | 99 | 99 |
| 1031427 | 0 | 3 | 2 | 2 | 3 | 1 | 1 | 1 | 3 | 1 | 0 | 0 | 1 | 1  | 1  | 1  | 0  | 0  | 0  |
| 1031428 | 0 | 1 | 2 | 4 | 3 | 1 | 1 | 1 | 3 | 1 | 0 | 0 | 0 | 99 | 99 | 99 | 99 | 99 | 99 |
| 1031429 | 0 | 4 | 2 | 3 | 3 | 1 | 2 | 1 | 3 | 1 | 0 | 0 | 1 | 1  | 3  | 1  | 1  | 0  | 1  |
| 1031430 | 0 | 3 | 2 | 2 | 3 | 1 | 1 | 1 | 3 | 1 | 0 | 0 | 0 | 99 | 99 | 99 | 99 | 99 | 99 |
| 103131  | 0 | 3 | 2 | 2 | 3 | 1 | 2 | 1 | 2 | 1 | 0 | 0 | 1 | 1  | 1  | 1  | 0  | 0  | 0  |
| 103132  | 0 | 2 | 2 | 5 | 3 | 5 | 2 | 2 | 2 | 4 | 0 | 0 | 1 | 1  | 1  | 1  | 0  | 0  | 0  |
| 103133  | 0 | 2 | 2 | 2 | 3 | 1 | 2 | 2 | 2 | 1 | 0 | 0 | 1 | 1  | 4  | 1  | 1  | 0  | 1  |
| 103134  | 0 | 2 | 2 | 3 | 3 | 1 | 3 | 2 | 2 | 1 | 0 | 0 | 1 | 1  | 1  | 1  | 0  | 0  | 0  |
| 103135  | 0 | 2 | 2 | 5 | 3 | 5 | 3 | 2 | 2 | 1 | 0 | 0 | 1 | 1  | 1  | 1  | 0  | 0  | 0  |
| 103136  | 1 | 4 | 2 | 2 | 3 | 2 | 1 | 1 | 2 | 1 | 0 | 0 | 1 | 1  | 4  | 1  | 1  | 0  | 1  |
| 103137  | 0 | 3 | 2 | 2 | 3 | 1 | 1 | 2 | 2 | 1 | 0 | 0 | 1 | 1  | 4  | 1  | 1  | 0  | 1  |
| 103138  | 0 | 2 | 2 | 2 | 3 | 1 | 1 | 2 | 2 | 1 | 0 | 0 | 0 | 99 | 99 | 99 | 99 | 99 | 99 |
| 103139  | 0 | 3 | 2 | 4 | 3 | 1 | 1 | 1 | 2 | 1 | 0 | 0 | 1 | 1  | 1  | 1  | 0  | 0  | 0  |
| 1031310 | 1 | 5 | 2 | 2 | 3 | 2 | 1 | 1 | 2 | 1 | 0 | 0 | 1 | 1  | 3  | 1  | 1  | 0  | 1  |
| 1031311 | 0 | 4 | 2 | 2 | 3 | 1 | 2 | 1 | 2 | 1 | 0 | 0 | 1 | 1  | 3  | 1  | 1  | 0  | 1  |
| 1031312 | 1 | 4 | 2 | 2 | 3 | 5 | 1 | 1 | 2 | 1 | 0 | 0 | 0 | 99 | 99 | 99 | 99 | 99 | 99 |
| 1031313 | 1 | 3 | 2 | 4 | 3 | 2 | 2 | 2 | 2 | 1 | 0 | 0 | 1 | 1  | 4  | 1  | 1  | 0  | 1  |
| 1031314 | 1 | 2 | 2 | 4 | 3 | 2 | 2 | 2 | 2 | 1 | 0 | 0 | 1 | 1  | 4  | 1  | 1  | 0  | 1  |
| 1031315 | 0 | 4 | 2 | 2 | 3 | 1 | 1 | 1 | 2 | 1 | 0 | 0 | 1 | 1  | 3  | 1  | 1  | 0  | 1  |
| 1031316 | 0 | 4 | 2 | 2 | 3 | 1 | 1 | 1 | 2 | 1 | 0 | 0 | 1 | 1  | 4  | 1  | 1  | 0  | 1  |
| 1031317 | 1 | 2 | 2 | 2 | 3 | 2 | 2 | 2 | 2 | 1 | 0 | 0 | 0 | 99 | 99 | 99 | 99 | 99 | 99 |
| 1031318 | 0 | 3 | 2 | 2 | 3 | 2 | 1 | 1 | 2 | 1 | 0 | 0 | 1 | 1  | 4  | 1  | 1  | 0  | 1  |
| 1031319 | 0 | 1 | 2 | 4 | 3 | 5 | 3 | 1 | 2 | 1 | 0 | 0 | 1 | 1  | 4  | 1  | 1  | 0  | 1  |
| 1031320 | 0 | 1 | 2 | 4 | 3 | 1 | 2 | 1 | 2 | 1 | 0 | 0 | 1 | 1  | 1  | 1  | 0  | 0  | 0  |
| 1031321 | 0 | 5 | 2 | 2 | 3 | 1 | 1 | 1 | 2 | 1 | 0 | 0 | 0 | 99 | 99 | 99 | 99 | 99 | 99 |
| 1031322 | 0 | 5 | 2 | 2 | 3 | 1 | 2 | 1 | 2 | 1 | 0 | 0 | 0 | 99 | 99 | 99 | 99 | 99 | 99 |
| 1031323 | 0 | 2 | 2 | 2 | 3 | 1 | 2 | 2 | 2 | 1 | 0 | 0 | 0 | 99 | 99 | 99 | 99 | 99 | 99 |
| 1031324 | 0 | 3 | 2 | 2 | 3 | 1 | 2 | 1 | 2 | 1 | 0 | 0 | 1 | 1  | 4  | 1  | 1  | 0  | 1  |
| 1031325 | 0 | 4 | 2 | 2 | 3 | 1 | 2 | 1 | 2 | 1 | 0 | 0 | 1 | 1  | 3  | 1  | 1  | 0  | 1  |
| 1031326 | 0 | 2 | 2 | 2 | 3 | 1 | 2 | 2 | 2 | 1 | 0 | 0 | 1 | 1  | 1  | 1  | 0  | 0  | 0  |
| 1031327 | 0 | 3 | 2 | 2 | 3 | 1 | 2 | 2 | 2 | 1 | 0 | 0 | 1 | 1  | 4  | 1  | 1  | 0  | 1  |
| 1031328 | 0 | 5 | 2 | 2 | 3 | 1 | 1 | 1 | 2 | 1 | 0 | 0 | 0 | 99 | 99 | 99 | 99 | 99 | 99 |
| 1031329 | 0 | 3 | 2 | 2 | 3 | 1 | 1 | 2 | 2 | 1 | 0 | 0 | 1 | 1  | 3  | 1  | 1  | 0  | 1  |
| 1031330 | 0 | 3 | 2 | 2 | 3 | 1 | 2 | 1 | 2 | 1 | 0 | 0 | 0 | 99 | 99 | 99 | 99 | 99 | 99 |



|         |   |   |   |   |   |   |   |   |   |   |   |   |   |    |    |    |    |    |    |
|---------|---|---|---|---|---|---|---|---|---|---|---|---|---|----|----|----|----|----|----|
| 103151  | 0 | 4 | 2 | 1 | 3 | 1 | 1 | 1 | 2 | 1 | 0 | 0 | 0 | 99 | 99 | 99 | 99 | 99 | 99 |
| 103152  | 0 | 4 | 2 | 2 | 3 | 1 | 2 | 1 | 2 | 1 | 0 | 0 | 1 | 1  | 3  | 1  | 1  | 0  | 1  |
| 103153  | 0 | 4 | 2 | 2 | 3 | 1 | 2 | 2 | 2 | 1 | 0 | 0 | 0 | 99 | 99 | 99 | 99 | 99 | 99 |
| 103154  | 0 | 1 | 2 | 2 | 3 | 1 | 2 | 2 | 2 | 1 | 0 | 0 | 0 | 99 | 99 | 99 | 99 | 99 | 99 |
| 103155  | 0 | 2 | 2 | 2 | 3 | 1 | 2 | 1 | 2 | 1 | 0 | 0 | 1 | 1  | 3  | 1  | 1  | 0  | 1  |
| 103156  | 1 | 4 | 2 | 2 | 3 | 2 | 2 | 1 | 2 | 1 | 0 | 0 | 0 | 99 | 99 | 99 | 99 | 99 | 99 |
| 103157  | 0 | 1 | 2 | 4 | 3 | 1 | 1 | 1 | 2 | 1 | 0 | 0 | 0 | 99 | 99 | 99 | 99 | 99 | 99 |
| 103158  | 0 | 4 | 2 | 2 | 3 | 1 | 1 | 1 | 2 | 1 | 0 | 0 | 0 | 99 | 99 | 99 | 99 | 99 | 99 |
| 103159  | 0 | 5 | 2 | 2 | 3 | 1 | 2 | 1 | 2 | 1 | 1 | 1 | 0 | 99 | 99 | 99 | 99 | 99 | 99 |
| 1031510 | 0 | 3 | 2 | 2 | 3 | 1 | 2 | 2 | 2 | 1 | 0 | 0 | 0 | 99 | 99 | 99 | 99 | 99 | 99 |
| 1031511 | 0 | 2 | 2 | 3 | 3 | 1 | 2 | 2 | 2 | 1 | 0 | 0 | 0 | 99 | 99 | 99 | 99 | 99 | 99 |
| 1031512 | 0 | 2 | 2 | 2 | 3 | 1 | 1 | 2 | 2 | 1 | 0 | 0 | 0 | 99 | 99 | 99 | 99 | 99 | 99 |
| 1031513 | 0 | 1 | 2 | 4 | 3 | 1 | 1 | 2 | 2 | 1 | 0 | 0 | 0 | 99 | 99 | 99 | 99 | 99 | 99 |
| 1031514 | 0 | 1 | 2 | 3 | 3 | 1 | 1 | 1 | 2 | 1 | 0 | 0 | 0 | 99 | 99 | 99 | 99 | 99 | 99 |
| 1031515 | 0 | 1 | 2 | 4 | 3 | 1 | 1 | 1 | 2 | 1 | 0 | 0 | 0 | 99 | 99 | 99 | 99 | 99 | 99 |
| 1031516 | 0 | 2 | 2 | 3 | 3 | 1 | 1 | 2 | 2 | 1 | 0 | 0 | 1 | 1  | 2  | 1  | 1  | 0  | 1  |
| 1031517 | 0 | 4 | 2 | 2 | 3 | 1 | 1 | 1 | 2 | 1 | 0 | 0 | 0 | 99 | 99 | 99 | 99 | 99 | 99 |
| 1031518 | 0 | 4 | 2 | 3 | 3 | 1 | 2 | 2 | 2 | 1 | 0 | 0 | 1 | 1  | 1  | 1  | 0  | 0  | 0  |
| 1031519 | 0 | 1 | 2 | 4 | 3 | 1 | 1 | 1 | 2 | 1 | 0 | 0 | 1 | 1  | 1  | 1  | 0  | 0  | 0  |
| 1031520 | 1 | 4 | 2 | 2 | 3 | 2 | 2 | 1 | 2 | 1 | 0 | 0 | 0 | 99 | 99 | 99 | 99 | 99 | 99 |
| 1031521 | 0 | 4 | 2 | 1 | 3 | 1 | 1 | 1 | 2 | 1 | 0 | 0 | 0 | 99 | 99 | 99 | 99 | 99 | 99 |
| 1031522 | 1 | 5 | 2 | 2 | 3 | 2 | 2 | 2 | 2 | 1 | 0 | 0 | 0 | 99 | 99 | 99 | 99 | 99 | 99 |
| 1031523 | 1 | 5 | 2 | 2 | 3 | 2 | 3 | 2 | 2 | 1 | 1 | 0 | 1 | 1  | 1  | 1  | 0  | 0  | 0  |
| 1031524 | 0 | 5 | 2 | 1 | 3 | 1 | 2 | 1 | 2 | 1 | 0 | 0 | 0 | 99 | 99 | 99 | 99 | 99 | 99 |
| 1031525 | 1 | 4 | 2 | 1 | 3 | 2 | 2 | 1 | 2 | 1 | 0 | 0 | 0 | 99 | 99 | 99 | 99 | 99 | 99 |
| 1031526 | 0 | 5 | 2 | 1 | 3 | 1 | 1 | 1 | 2 | 1 | 0 | 0 | 0 | 99 | 99 | 99 | 99 | 99 | 99 |
| 1031527 | 0 | 4 | 2 | 2 | 3 | 1 | 2 | 1 | 2 | 1 | 0 | 0 | 0 | 99 | 99 | 99 | 99 | 99 | 99 |
| 1031528 | 0 | 1 | 2 | 3 | 3 | 1 | 2 | 2 | 2 | 1 | 0 | 0 | 1 | 1  | 1  | 1  | 0  | 0  | 0  |
| 1031529 | 0 | 3 | 2 | 2 | 3 | 1 | 2 | 1 | 2 | 1 | 0 | 0 | 1 | 1  | 2  | 1  | 1  | 0  | 1  |
| 1031530 | 0 | 2 | 2 | 5 | 3 | 5 | 3 | 1 | 2 | 1 | 0 | 0 | 1 | 1  | 1  | 1  | 0  | 0  | 0  |
| 103161  | 0 | 3 | 2 | 2 | 3 | 1 | 2 | 2 | 1 | 1 | 0 | 0 | 0 | 99 | 99 | 99 | 99 | 99 | 99 |
| 103162  | 0 | 3 | 2 | 3 | 3 | 1 | 2 | 2 | 1 | 1 | 0 | 0 | 0 | 99 | 99 | 99 | 99 | 99 | 99 |
| 103163  | 0 | 2 | 2 | 3 | 3 | 1 | 3 | 2 | 1 | 1 | 0 | 0 | 1 | 1  | 1  | 1  | 0  | 0  | 0  |
| 103164  | 0 | 2 | 2 | 3 | 3 | 1 | 2 | 1 | 1 | 1 | 0 | 0 | 1 | 1  | 1  | 1  | 0  | 0  | 0  |
| 103165  | 0 | 4 | 2 | 4 | 3 | 1 | 1 | 1 | 1 | 1 | 0 | 0 | 1 | 1  | 1  | 1  | 0  | 0  | 0  |
| 103166  | 0 | 4 | 2 | 2 | 3 | 1 | 1 | 1 | 1 | 1 | 0 | 0 | 1 | 1  | 1  | 1  | 0  | 0  | 0  |
| 103167  | 0 | 2 | 2 | 2 | 3 | 1 | 1 | 2 | 1 | 1 | 0 | 0 | 0 | 99 | 99 | 99 | 99 | 99 | 99 |
| 103168  | 0 | 5 | 2 | 2 | 3 | 1 | 2 | 1 | 1 | 1 | 0 | 0 | 1 | 1  | 1  | 1  | 0  | 0  | 0  |
| 103169  | 0 | 5 | 2 | 2 | 3 | 1 | 1 | 2 | 1 | 1 | 0 | 0 | 0 | 99 | 99 | 99 | 99 | 99 | 99 |
| 1031610 | 0 | 1 | 2 | 4 | 3 | 1 | 2 | 1 | 1 | 1 | 0 | 0 | 0 | 99 | 99 | 99 | 99 | 99 | 99 |
| 1031611 | 0 | 1 | 2 | 2 | 3 | 1 | 1 | 2 | 1 | 1 | 0 | 0 | 1 | 1  | 4  | 1  | 1  | 0  | 1  |
| 1031612 | 0 | 2 | 2 | 2 | 3 | 1 | 2 | 1 | 1 | 1 | 1 | 1 | 1 | 1  | 3  | 1  | 1  | 0  | 1  |
| 1031613 | 0 | 3 | 2 | 2 | 3 | 1 | 2 | 2 | 1 | 1 | 0 | 0 | 1 | 1  | 4  | 1  | 1  | 0  | 1  |
| 1031614 | 0 | 3 | 2 | 2 | 3 | 1 | 1 | 1 | 1 | 1 | 0 | 0 | 1 | 1  | 2  | 1  | 1  | 0  | 1  |
| 1031615 | 0 | 5 | 2 | 2 | 3 | 1 | 1 | 2 | 1 | 1 | 0 | 0 | 1 | 1  | 1  | 1  | 0  | 0  | 0  |
| 1031616 | 0 | 4 | 2 | 2 | 3 | 1 | 1 | 2 | 1 | 1 | 0 | 0 | 0 | 99 | 99 | 99 | 99 | 99 | 99 |
| 1031617 | 0 | 4 | 2 | 2 | 3 | 1 | 2 | 2 | 1 | 1 | 1 | 1 | 0 | 99 | 99 | 99 | 99 | 99 | 99 |
| 1031618 | 0 | 4 | 2 | 2 | 3 | 1 | 1 | 2 | 1 | 1 | 0 | 0 | 0 | 99 | 99 | 99 | 99 | 99 | 99 |
| 1031619 | 0 | 5 | 2 | 1 | 3 | 1 | 2 | 2 | 1 | 1 | 1 | 1 | 0 | 99 | 99 | 99 | 99 | 99 | 99 |
| 1031620 | 0 | 3 | 2 | 3 | 3 | 1 | 2 | 1 | 1 | 1 | 0 | 0 | 0 | 99 | 99 | 99 | 99 | 99 | 99 |
| 1031621 | 0 | 1 | 2 | 5 | 3 | 5 | 3 | 1 | 1 | 1 | 1 | 1 | 1 | 1  | 2  | 1  | 1  | 0  | 1  |
| 1031622 | 0 | 4 | 2 | 4 | 3 | 1 | 2 | 2 | 1 | 1 | 1 | 1 | 0 | 99 | 99 | 99 | 99 | 99 | 99 |
| 1031623 | 0 | 4 | 2 | 3 | 3 | 1 | 3 | 1 | 1 | 1 | 1 | 1 | 1 | 1  | 1  | 1  | 0  | 0  | 0  |
| 204171  | 0 | 1 | 1 | 4 | 1 | 1 | 2 | 2 | 4 | 4 | 0 | 0 | 1 | 1  | 1  | 1  | 0  | 0  | 0  |
| 204172  | 0 | 3 | 1 | 1 | 1 | 2 | 2 | 1 | 4 | 4 | 0 | 0 | 1 | 1  | 1  | 1  | 0  | 0  | 0  |
| 204173  | 0 | 1 | 1 | 2 | 1 | 1 | 2 | 1 | 4 | 4 | 0 | 0 | 1 | 1  | 2  | 1  | 1  | 0  | 1  |

|         |   |   |   |   |   |   |   |   |   |   |   |   |   |   |   |   |   |   |   |
|---------|---|---|---|---|---|---|---|---|---|---|---|---|---|---|---|---|---|---|---|
| 204174  | 1 | 2 | 1 | 2 | 1 | 2 | 2 | 2 | 4 | 4 | 0 | 0 | 1 | 1 | 3 | 1 | 1 | 0 | 1 |
| 204175  | 0 | 1 | 1 | 4 | 1 | 2 | 2 | 1 | 4 | 4 | 0 | 0 | 1 | 1 | 2 | 1 | 1 | 0 | 1 |
| 204176  | 1 | 5 | 1 | 2 | 1 | 2 | 2 | 2 | 4 | 4 | 0 | 0 | 1 | 1 | 2 | 1 | 1 | 0 | 1 |
| 204177  | 1 | 4 | 1 | 2 | 1 | 2 | 1 | 2 | 4 | 1 | 0 | 0 | 1 | 1 | 1 | 4 | 0 | 1 | 1 |
| 204178  | 1 | 2 | 1 | 1 | 1 | 2 | 2 | 1 | 4 | 4 | 0 | 0 | 1 | 1 | 3 | 1 | 1 | 0 | 1 |
| 204179  | 0 | 1 | 1 | 2 | 1 | 1 | 2 | 2 | 4 | 2 | 0 | 0 | 1 | 1 | 3 | 1 | 1 | 0 | 1 |
| 2041710 | 0 | 1 | 1 | 5 | 1 | 1 | 2 | 2 | 4 | 1 | 0 | 0 | 1 | 1 | 1 | 4 | 0 | 1 | 1 |
| 2041711 | 1 | 4 | 1 | 2 | 1 | 2 | 2 | 2 | 4 | 4 | 0 | 0 | 1 | 1 | 3 | 4 | 1 | 1 | 1 |
| 2041712 | 1 | 4 | 1 | 2 | 1 | 4 | 2 | 2 | 4 | 4 | 0 | 0 | 1 | 1 | 3 | 4 | 1 | 1 | 1 |
| 2041713 | 0 | 4 | 1 | 2 | 1 | 1 | 2 | 1 | 4 | 4 | 0 | 0 | 1 | 1 | 1 | 4 | 0 | 1 | 1 |
| 2041714 | 1 | 5 | 1 | 2 | 1 | 2 | 1 | 1 | 4 | 3 | 0 | 0 | 1 | 1 | 4 | 4 | 1 | 1 | 1 |
| 2041715 | 1 | 5 | 1 | 2 | 1 | 2 | 2 | 1 | 4 | 1 | 0 | 0 | 1 | 1 | 4 | 4 | 1 | 1 | 1 |
| 2041716 | 1 | 5 | 1 | 2 | 1 | 2 | 2 | 2 | 4 | 1 | 0 | 0 | 1 | 1 | 4 | 4 | 1 | 1 | 1 |
| 2041717 | 1 | 4 | 1 | 3 | 1 | 5 | 3 | 2 | 4 | 1 | 1 | 1 | 1 | 1 | 1 | 1 | 0 | 0 | 0 |
| 2041718 | 0 | 4 | 1 | 1 | 1 | 1 | 2 | 2 | 4 | 2 | 0 | 0 | 1 | 1 | 4 | 4 | 1 | 1 | 1 |
| 2041719 | 0 | 3 | 1 | 2 | 1 | 1 | 2 | 2 | 4 | 1 | 0 | 0 | 1 | 1 | 3 | 1 | 1 | 0 | 1 |
| 2041720 | 1 | 5 | 1 | 2 | 1 | 2 | 2 | 2 | 4 | 1 | 0 | 0 | 1 | 1 | 4 | 1 | 1 | 0 | 1 |
| 2041721 | 1 | 4 | 1 | 1 | 1 | 2 | 2 | 2 | 4 | 1 | 0 | 0 | 1 | 1 | 3 | 4 | 1 | 1 | 1 |
| 2041722 | 1 | 2 | 1 | 1 | 1 | 2 | 2 | 2 | 4 | 1 | 0 | 0 | 1 | 1 | 3 | 4 | 1 | 1 | 1 |
| 2041723 | 0 | 2 | 1 | 3 | 1 | 1 | 2 | 2 | 4 | 1 | 0 | 0 | 1 | 1 | 1 | 1 | 0 | 0 | 0 |
| 2041724 | 0 | 5 | 1 | 1 | 1 | 1 | 2 | 1 | 4 | 1 | 0 | 0 | 1 | 1 | 3 | 4 | 1 | 1 | 1 |
| 2041725 | 1 | 5 | 1 | 1 | 1 | 2 | 2 | 2 | 4 | 2 | 0 | 0 | 1 | 1 | 1 | 4 | 0 | 1 | 1 |
| 2041726 | 1 | 2 | 1 | 2 | 1 | 2 | 2 | 1 | 4 | 1 | 0 | 0 | 1 | 1 | 3 | 1 | 1 | 0 | 1 |
| 2041727 | 1 | 5 | 1 | 1 | 1 | 2 | 2 | 2 | 4 | 2 | 0 | 0 | 1 | 1 | 3 | 1 | 1 | 0 | 1 |
| 2041728 | 1 | 3 | 1 | 2 | 1 | 2 | 3 | 2 | 4 | 1 | 0 | 0 | 1 | 1 | 1 | 1 | 0 | 0 | 0 |
| 2041729 | 1 | 2 | 1 | 2 | 1 | 2 | 2 | 2 | 4 | 3 | 0 | 0 | 1 | 1 | 3 | 4 | 1 | 1 | 1 |
| 2041730 | 0 | 4 | 1 | 2 | 1 | 2 | 1 | 1 | 4 | 3 | 0 | 0 | 1 | 1 | 4 | 4 | 1 | 1 | 1 |
| 2041731 | 1 | 1 | 1 | 2 | 1 | 2 | 2 | 1 | 4 | 3 | 0 | 0 | 1 | 1 | 1 | 1 | 0 | 0 | 0 |
| 2041732 | 1 | 2 | 1 | 5 | 1 | 2 | 2 | 1 | 4 | 4 | 0 | 0 | 1 | 1 | 2 | 1 | 1 | 0 | 1 |
| 2041733 | 1 | 2 | 1 | 3 | 1 | 2 | 2 | 1 | 4 | 4 | 0 | 0 | 1 | 1 | 2 | 1 | 1 | 0 | 1 |
| 2041734 | 1 | 4 | 1 | 2 | 1 | 2 | 1 | 1 | 4 | 4 | 0 | 0 | 1 | 1 | 3 | 1 | 1 | 0 | 1 |
| 2041735 | 0 | 3 | 1 | 2 | 1 | 1 | 2 | 2 | 4 | 1 | 0 | 0 | 1 | 1 | 2 | 4 | 1 | 1 | 1 |
| 204181  | 1 | 3 | 1 | 2 | 1 | 2 | 3 | 2 | 1 | 2 | 0 | 0 | 1 | 1 | 3 | 4 | 1 | 1 | 1 |
| 204182  | 1 | 4 | 1 | 2 | 1 | 2 | 1 | 2 | 1 | 1 | 0 | 0 | 1 | 1 | 3 | 1 | 1 | 0 | 1 |
| 204183  | 1 | 3 | 1 | 2 | 1 | 2 | 2 | 2 | 1 | 3 | 0 | 0 | 1 | 1 | 4 | 4 | 1 | 1 | 1 |
| 204184  | 1 | 4 | 1 | 2 | 1 | 2 | 2 | 1 | 1 | 2 | 0 | 0 | 1 | 1 | 4 | 4 | 1 | 1 | 1 |
| 204185  | 0 | 5 | 1 | 1 | 1 | 2 | 2 | 1 | 1 | 1 | 0 | 0 | 1 | 1 | 3 | 1 | 1 | 0 | 1 |
| 204186  | 0 | 5 | 1 | 1 | 1 | 2 | 2 | 1 | 2 | 1 | 0 | 0 | 1 | 1 | 3 | 4 | 1 | 1 | 1 |
| 204187  | 1 | 2 | 1 | 5 | 1 | 2 | 2 | 2 | 4 | 2 | 0 | 0 | 1 | 1 | 1 | 1 | 0 | 0 | 0 |
| 204188  | 1 | 1 | 1 | 4 | 1 | 2 | 2 | 1 | 1 | 2 | 0 | 0 | 1 | 1 | 3 | 1 | 1 | 0 | 1 |
| 204189  | 1 | 4 | 1 | 2 | 1 | 2 | 2 | 1 | 1 | 1 | 0 | 0 | 1 | 1 | 3 | 4 | 1 | 1 | 1 |
| 2041810 | 1 | 5 | 1 | 3 | 1 | 2 | 1 | 2 | 1 | 2 | 0 | 0 | 1 | 1 | 1 | 1 | 0 | 0 | 0 |
| 2041811 | 1 | 4 | 1 | 4 | 1 | 2 | 3 | 2 | 4 | 2 | 0 | 0 | 1 | 1 | 3 | 4 | 1 | 1 | 1 |
| 2041812 | 0 | 3 | 1 | 2 | 1 | 2 | 3 | 1 | 1 | 1 | 0 | 0 | 1 | 1 | 1 | 6 | 0 | 1 | 1 |
| 2041813 | 0 | 3 | 1 | 2 | 1 | 2 | 2 | 1 | 4 | 2 | 0 | 0 | 1 | 1 | 4 | 1 | 1 | 0 | 1 |
| 2041814 | 1 | 3 | 1 | 4 | 1 | 2 | 2 | 1 | 3 | 4 | 0 | 0 | 1 | 1 | 1 | 1 | 0 | 0 | 0 |
| 2041815 | 1 | 1 | 1 | 5 | 1 | 2 | 1 | 1 | 4 | 4 | 0 | 0 | 1 | 1 | 3 | 1 | 1 | 0 | 1 |
| 2041816 | 1 | 3 | 1 | 2 | 1 | 2 | 2 | 1 | 4 | 4 | 0 | 0 | 1 | 1 | 3 | 1 | 1 | 0 | 1 |
| 2041817 | 1 | 4 | 1 | 2 | 1 | 2 | 2 | 2 | 4 | 4 | 0 | 0 | 1 | 1 | 1 | 1 | 0 | 0 | 0 |
| 2041818 | 1 | 5 | 1 | 2 | 1 | 2 | 2 | 2 | 1 | 1 | 0 | 0 | 1 | 1 | 3 | 1 | 1 | 0 | 1 |
| 2041819 | 1 | 2 | 1 | 5 | 1 | 5 | 2 | 1 | 4 | 4 | 1 | 1 | 1 | 1 | 1 | 1 | 0 | 0 | 0 |
| 2041820 | 0 | 4 | 1 | 1 | 1 | 2 | 3 | 2 | 1 | 1 | 0 | 0 | 1 | 1 | 4 | 1 | 1 | 0 | 1 |
| 2041821 | 1 | 3 | 1 | 3 | 1 | 2 | 2 | 2 | 4 | 2 | 0 | 0 | 1 | 1 | 3 | 1 | 1 | 0 | 1 |
| 2041822 | 1 | 4 | 1 | 1 | 1 | 2 | 2 | 1 | 4 | 4 | 0 | 0 | 1 | 1 | 2 | 1 | 1 | 0 | 1 |
| 2041823 | 1 | 5 | 1 | 1 | 1 | 2 | 2 | 2 | 1 | 1 | 0 | 0 | 1 | 1 | 3 | 1 | 1 | 0 | 1 |
| 2041824 | 1 | 1 | 1 | 4 | 1 | 2 | 2 | 1 | 1 | 1 | 0 | 0 | 1 | 1 | 1 | 4 | 0 | 1 | 1 |

|         |   |   |   |   |   |   |   |   |   |   |   |   |   |    |    |    |    |    |    |
|---------|---|---|---|---|---|---|---|---|---|---|---|---|---|----|----|----|----|----|----|
| 2041825 | 0 | 1 | 1 | 3 | 1 | 1 | 2 | 1 | 1 | 1 | 0 | 0 | 1 | 1  | 3  | 4  | 1  | 1  | 1  |
| 2041826 | 1 | 3 | 1 | 2 | 1 | 2 | 2 | 2 | 1 | 1 | 0 | 0 | 1 | 1  | 3  | 4  | 1  | 1  | 1  |
| 2041827 | 1 | 5 | 1 | 2 | 1 | 2 | 2 | 1 | 1 | 1 | 0 | 0 | 1 | 1  | 3  | 4  | 1  | 1  | 1  |
| 2041828 | 1 | 5 | 1 | 1 | 1 | 2 | 2 | 2 | 4 | 4 | 0 | 0 | 1 | 1  | 3  | 4  | 1  | 1  | 1  |
| 2041829 | 1 | 1 | 1 | 4 | 1 | 2 | 2 | 1 | 4 | 4 | 0 | 0 | 1 | 1  | 4  | 1  | 1  | 0  | 1  |
| 2041830 | 1 | 4 | 1 | 2 | 1 | 1 | 2 | 2 | 1 | 1 | 0 | 0 | 1 | 1  | 4  | 1  | 1  | 0  | 1  |
| 204191  | 1 | 2 | 1 | 4 | 1 | 2 | 2 | 2 | 3 | 4 | 0 | 0 | 1 | 1  | 1  | 5  | 0  | 1  | 1  |
| 204192  | 1 | 1 | 1 | 5 | 1 | 2 | 2 | 1 | 1 | 2 | 0 | 0 | 1 | 1  | 3  | 1  | 1  | 0  | 1  |
| 204193  | 0 | 2 | 1 | 2 | 1 | 2 | 1 | 1 | 3 | 4 | 0 | 0 | 1 | 1  | 3  | 1  | 1  | 0  | 1  |
| 204194  | 1 | 5 | 1 | 1 | 1 | 2 | 1 | 1 | 3 | 4 | 0 | 0 | 1 | 1  | 3  | 7  | 1  | 1  | 1  |
| 204195  | 0 | 3 | 1 | 2 | 1 | 2 | 2 | 2 | 1 | 3 | 0 | 0 | 1 | 1  | 1  | 5  | 0  | 1  | 1  |
| 204196  | 0 | 4 | 1 | 2 | 1 | 2 | 1 | 1 | 1 | 2 | 0 | 0 | 1 | 1  | 3  | 1  | 1  | 0  | 1  |
| 204197  | 0 | 5 | 1 | 1 | 1 | 2 | 1 | 1 | 1 | 2 | 0 | 0 | 1 | 1  | 2  | 1  | 1  | 0  | 1  |
| 204198  | 0 | 3 | 1 | 4 | 1 | 1 | 2 | 1 | 1 | 2 | 0 | 0 | 1 | 1  | 3  | 7  | 1  | 1  | 1  |
| 204199  | 0 | 5 | 1 | 1 | 1 | 2 | 1 | 1 | 1 | 4 | 0 | 0 | 0 | 99 | 99 | 99 | 99 | 99 | 99 |
| 2041910 | 0 | 3 | 1 | 2 | 1 | 2 | 1 | 2 | 3 | 4 | 0 | 0 | 1 | 1  | 3  | 5  | 1  | 1  | 1  |
| 2041911 | 0 | 3 | 1 | 2 | 1 | 2 | 2 | 2 | 1 | 2 | 0 | 0 | 1 | 1  | 2  | 7  | 1  | 1  | 1  |
| 2041912 | 1 | 2 | 1 | 3 | 1 | 2 | 2 | 1 | 3 | 4 | 0 | 0 | 1 | 1  | 3  | 1  | 1  | 0  | 1  |
| 2041913 | 1 | 5 | 1 | 1 | 1 | 2 | 1 | 1 | 3 | 4 | 0 | 0 | 1 | 1  | 3  | 6  | 1  | 1  | 1  |
| 2041914 | 1 | 5 | 1 | 1 | 1 | 2 | 1 | 1 | 3 | 4 | 0 | 0 | 1 | 1  | 3  | 1  | 1  | 0  | 1  |
| 2041915 | 0 | 3 | 1 | 2 | 1 | 2 | 1 | 1 | 3 | 2 | 0 | 0 | 1 | 1  | 3  | 1  | 1  | 0  | 1  |
| 2041916 | 1 | 2 | 1 | 2 | 1 | 2 | 2 | 1 | 3 | 4 | 0 | 0 | 1 | 1  | 3  | 1  | 1  | 0  | 1  |
| 2041917 | 1 | 2 | 1 | 2 | 1 | 2 | 1 | 2 | 3 | 4 | 0 | 0 | 1 | 1  | 2  | 1  | 1  | 0  | 1  |
| 2041918 | 1 | 3 | 1 | 2 | 1 | 2 | 2 | 2 | 3 | 3 | 0 | 0 | 1 | 1  | 3  | 1  | 1  | 0  | 1  |
| 2041919 | 1 | 3 | 1 | 2 | 1 | 2 | 1 | 1 | 3 | 4 | 0 | 0 | 1 | 1  | 3  | 1  | 1  | 0  | 1  |
| 2041920 | 0 | 5 | 1 | 1 | 1 | 2 | 1 | 1 | 3 | 4 | 0 | 0 | 1 | 1  | 2  | 1  | 1  | 0  | 1  |
| 2041921 | 0 | 3 | 1 | 2 | 1 | 2 | 2 | 2 | 3 | 4 | 0 | 0 | 1 | 1  | 1  | 1  | 0  | 0  | 0  |
| 2041922 | 1 | 4 | 1 | 2 | 1 | 2 | 1 | 1 | 3 | 3 | 0 | 0 | 1 | 1  | 2  | 1  | 1  | 0  | 1  |
| 2041923 | 1 | 5 | 1 | 1 | 1 | 2 | 1 | 1 | 3 | 4 | 0 | 0 | 1 | 1  | 2  | 6  | 1  | 1  | 1  |
| 2041924 | 1 | 2 | 1 | 2 | 1 | 2 | 2 | 2 | 3 | 4 | 0 | 0 | 1 | 1  | 3  | 1  | 1  | 0  | 1  |
| 2041925 | 1 | 2 | 1 | 2 | 1 | 2 | 1 | 1 | 3 | 4 | 0 | 0 | 1 | 1  | 1  | 1  | 0  | 0  | 0  |
| 2041926 | 0 | 2 | 1 | 3 | 1 | 2 | 1 | 1 | 3 | 4 | 0 | 0 | 1 | 1  | 1  | 1  | 0  | 0  | 0  |
| 2041927 | 1 | 4 | 1 | 1 | 1 | 2 | 2 | 2 | 3 | 4 | 0 | 0 | 1 | 1  | 2  | 1  | 1  | 0  | 1  |
| 2041928 | 0 | 4 | 1 | 1 | 1 | 2 | 1 | 1 | 3 | 4 | 0 | 0 | 1 | 1  | 1  | 1  | 0  | 0  | 0  |
| 2041929 | 0 | 1 | 1 | 4 | 1 | 2 | 1 | 1 | 3 | 4 | 0 | 0 | 1 | 1  | 2  | 1  | 1  | 0  | 1  |
| 2041930 | 1 | 2 | 1 | 2 | 1 | 2 | 1 | 1 | 1 | 4 | 0 | 0 | 1 | 1  | 2  | 1  | 1  | 0  | 1  |
| 204201  | 1 | 2 | 1 | 4 | 1 | 2 | 2 | 1 | 1 | 4 | 0 | 0 | 1 | 1  | 3  | 7  | 1  | 1  | 1  |
| 204202  | 0 | 1 | 1 | 4 | 1 | 2 | 2 | 1 | 1 | 4 | 0 | 0 | 1 | 1  | 3  | 1  | 1  | 0  | 1  |
| 204203  | 1 | 3 | 1 | 5 | 1 | 5 | 2 | 1 | 1 | 4 | 0 | 0 | 1 | 1  | 3  | 1  | 1  | 0  | 1  |
| 204204  | 1 | 2 | 1 | 2 | 1 | 2 | 1 | 1 | 1 | 4 | 0 | 0 | 1 | 1  | 3  | 7  | 1  | 1  | 1  |
| 204205  | 1 | 3 | 1 | 2 | 1 | 2 | 2 | 2 | 1 | 2 | 0 | 0 | 1 | 1  | 2  | 1  | 1  | 0  | 1  |
| 204206  | 1 | 5 | 1 | 1 | 1 | 2 | 1 | 1 | 1 | 2 | 0 | 0 | 0 | 99 | 99 | 99 | 99 | 99 | 99 |
| 204207  | 1 | 3 | 1 | 2 | 1 | 2 | 1 | 2 | 1 | 1 | 0 | 0 | 1 | 1  | 3  | 1  | 1  | 0  | 1  |
| 204208  | 1 | 1 | 1 | 3 | 1 | 2 | 2 | 1 | 1 | 2 | 0 | 0 | 1 | 1  | 3  | 1  | 1  | 0  | 1  |
| 204209  | 0 | 3 | 1 | 2 | 1 | 1 | 1 | 1 | 1 | 2 | 0 | 0 | 1 | 1  | 2  | 1  | 1  | 0  | 1  |
| 2042010 | 0 | 3 | 1 | 2 | 1 | 3 | 1 | 2 | 1 | 2 | 0 | 0 | 1 | 1  | 3  | 1  | 1  | 0  | 1  |
| 2042011 | 1 | 5 | 1 | 1 | 1 | 2 | 1 | 1 | 1 | 3 | 0 | 0 | 1 | 1  | 2  | 1  | 1  | 0  | 1  |
| 2042012 | 0 | 5 | 1 | 1 | 1 | 2 | 1 | 1 | 1 | 3 | 0 | 0 | 0 | 99 | 99 | 99 | 99 | 99 | 99 |
| 2042013 | 1 | 3 | 1 | 2 | 1 | 2 | 2 | 2 | 1 | 4 | 0 | 0 | 1 | 1  | 3  | 1  | 1  | 0  | 1  |
| 2042014 | 0 | 4 | 1 | 1 | 1 | 2 | 1 | 2 | 1 | 4 | 0 | 0 | 1 | 1  | 2  | 1  | 1  | 0  | 1  |
| 2042015 | 1 | 2 | 1 | 2 | 1 | 2 | 2 | 1 | 1 | 2 | 0 | 0 | 1 | 1  | 2  | 1  | 1  | 0  | 1  |
| 2042016 | 0 | 2 | 1 | 2 | 1 | 1 | 1 | 1 | 1 | 2 | 0 | 0 | 1 | 1  | 3  | 6  | 1  | 1  | 1  |
| 2042017 | 0 | 2 | 1 | 2 | 1 | 2 | 3 | 2 | 1 | 1 | 0 | 0 | 1 | 1  | 3  | 6  | 1  | 1  | 1  |
| 2042018 | 1 | 4 | 1 | 2 | 1 | 2 | 2 | 2 | 4 | 4 | 0 | 0 | 1 | 1  | 3  | 1  | 1  | 0  | 1  |
| 2042019 | 1 | 3 | 1 | 2 | 1 | 2 | 2 | 2 | 1 | 4 | 0 | 0 | 1 | 1  | 3  | 1  | 1  | 0  | 1  |
| 2042020 | 0 | 5 | 1 | 1 | 1 | 2 | 1 | 1 | 1 | 4 | 0 | 0 | 1 | 1  | 3  | 1  | 1  | 0  | 1  |

|         |   |   |   |   |   |   |   |   |   |   |   |   |   |    |    |    |    |    |    |
|---------|---|---|---|---|---|---|---|---|---|---|---|---|---|----|----|----|----|----|----|
| 2042021 | 1 | 3 | 1 | 2 | 1 | 2 | 2 | 1 | 1 | 4 | 0 | 0 | 1 | 1  | 4  | 1  | 1  | 0  | 1  |
| 2042022 | 1 | 5 | 1 | 1 | 1 | 2 | 1 | 1 | 1 | 4 | 0 | 0 | 1 | 1  | 2  | 6  | 1  | 1  | 1  |
| 2042023 | 1 | 2 | 1 | 2 | 1 | 2 | 2 | 2 | 1 | 4 | 0 | 0 | 1 | 1  | 1  | 1  | 0  | 0  | 0  |
| 2042024 | 1 | 1 | 1 | 4 | 1 | 2 | 2 | 1 | 1 | 4 | 0 | 0 | 1 | 1  | 4  | 1  | 1  | 0  | 1  |
| 2042025 | 1 | 3 | 1 | 2 | 1 | 2 | 1 | 2 | 1 | 4 | 0 | 0 | 1 | 1  | 3  | 1  | 1  | 0  | 1  |
| 205211  | 0 | 3 | 1 | 2 | 1 | 2 | 1 | 2 | 3 | 1 | 0 | 0 | 1 | 1  | 4  | 4  | 1  | 1  | 1  |
| 205212  | 1 | 3 | 1 | 2 | 1 | 2 | 3 | 2 | 3 | 1 | 0 | 0 | 1 | 1  | 1  | 1  | 0  | 0  | 0  |
| 205213  | 0 | 5 | 1 | 2 | 1 | 2 | 1 | 2 | 3 | 1 | 0 | 0 | 1 | 1  | 2  | 1  | 1  | 0  | 1  |
| 205214  | 0 | 3 | 1 | 2 | 1 | 2 | 1 | 1 | 3 | 2 | 0 | 0 | 1 | 1  | 2  | 1  | 1  | 0  | 1  |
| 205215  | 1 | 4 | 1 | 4 | 1 | 2 | 1 | 1 | 3 | 3 | 0 | 0 | 1 | 1  | 2  | 1  | 1  | 0  | 1  |
| 205216  | 0 | 4 | 1 | 1 | 1 | 2 | 1 | 1 | 3 | 3 | 0 | 0 | 1 | 1  | 3  | 1  | 1  | 0  | 1  |
| 205217  | 0 | 2 | 1 | 2 | 1 | 2 | 1 | 2 | 3 | 3 | 0 | 0 | 1 | 1  | 2  | 1  | 1  | 0  | 1  |
| 205218  | 1 | 2 | 1 | 4 | 1 | 2 | 1 | 2 | 3 | 3 | 0 | 0 | 1 | 1  | 1  | 1  | 0  | 0  | 0  |
| 205219  | 1 | 5 | 1 | 2 | 1 | 2 | 1 | 2 | 3 | 4 | 0 | 0 | 1 | 1  | 1  | 1  | 0  | 0  | 0  |
| 2052110 | 0 | 3 | 1 | 2 | 1 | 2 | 2 | 2 | 3 | 2 | 0 | 0 | 1 | 1  | 1  | 1  | 0  | 0  | 0  |
| 2052111 | 0 | 4 | 1 | 2 | 1 | 2 | 1 | 1 | 3 | 1 | 0 | 0 | 1 | 1  | 2  | 1  | 1  | 0  | 1  |
| 2052112 | 1 | 3 | 1 | 2 | 1 | 2 | 2 | 1 | 3 | 3 | 0 | 0 | 1 | 1  | 2  | 1  | 1  | 0  | 1  |
| 2052113 | 0 | 3 | 1 | 1 | 1 | 2 | 2 | 1 | 3 | 2 | 0 | 0 | 1 | 1  | 2  | 1  | 1  | 0  | 1  |
| 2052114 | 0 | 2 | 1 | 2 | 1 | 2 | 1 | 2 | 3 | 2 | 0 | 0 | 1 | 1  | 1  | 1  | 0  | 0  | 0  |
| 2052115 | 0 | 1 | 1 | 5 | 1 | 5 | 2 | 1 | 3 | 1 | 0 | 0 | 1 | 1  | 1  | 1  | 0  | 0  | 0  |
| 2052116 | 1 | 3 | 1 | 2 | 1 | 2 | 1 | 2 | 3 | 4 | 0 | 0 | 1 | 1  | 3  | 1  | 1  | 0  | 1  |
| 2052117 | 1 | 2 | 1 | 2 | 1 | 2 | 2 | 1 | 3 | 1 | 0 | 0 | 1 | 1  | 1  | 1  | 0  | 0  | 0  |
| 2052118 | 0 | 3 | 1 | 2 | 1 | 2 | 1 | 2 | 3 | 1 | 0 | 0 | 1 | 1  | 5  | 4  | 1  | 1  | 1  |
| 2052119 | 0 | 3 | 1 | 2 | 1 | 2 | 1 | 2 | 3 | 1 | 0 | 0 | 1 | 1  | 1  | 1  | 0  | 0  | 0  |
| 2052120 | 1 | 5 | 1 | 1 | 1 | 2 | 1 | 1 | 3 | 1 | 0 | 0 | 1 | 1  | 2  | 1  | 1  | 0  | 1  |
| 2052121 | 0 | 3 | 1 | 2 | 1 | 2 | 2 | 2 | 3 | 1 | 0 | 0 | 1 | 1  | 3  | 1  | 1  | 0  | 1  |
| 2052122 | 1 | 3 | 1 | 2 | 1 | 2 | 1 | 2 | 1 | 1 | 0 | 0 | 0 | 99 | 99 | 99 | 99 | 99 | 99 |
| 2052123 | 0 | 3 | 1 | 2 | 1 | 2 | 2 | 2 | 3 | 1 | 0 | 0 | 1 | 1  | 1  | 1  | 0  | 0  | 0  |
| 2052124 | 0 | 3 | 1 | 2 | 1 | 2 | 1 | 2 | 3 | 1 | 0 | 0 | 1 | 1  | 2  | 1  | 1  | 0  | 1  |
| 2052125 | 1 | 2 | 1 | 2 | 1 | 2 | 1 | 2 | 1 | 4 | 0 | 0 | 1 | 1  | 2  | 1  | 1  | 0  | 1  |
| 2052126 | 1 | 2 | 1 | 4 | 1 | 2 | 2 | 2 | 3 | 2 | 0 | 0 | 1 | 1  | 1  | 1  | 0  | 0  | 0  |
| 2052127 | 0 | 3 | 1 | 2 | 1 | 2 | 1 | 2 | 3 | 2 | 0 | 0 | 1 | 1  | 2  | 1  | 1  | 0  | 1  |
| 2052128 | 0 | 3 | 1 | 3 | 2 | 2 | 2 | 2 | 3 | 2 | 0 | 0 | 1 | 1  | 1  | 1  | 0  | 0  | 0  |
| 2052129 | 1 | 4 | 1 | 2 | 1 | 2 | 2 | 1 | 2 | 1 | 0 | 0 | 1 | 1  | 3  | 1  | 1  | 0  | 1  |
| 2052130 | 0 | 5 | 1 | 1 | 1 | 2 | 1 | 1 | 3 | 3 | 0 | 0 | 0 | 99 | 99 | 99 | 99 | 99 | 99 |
| 205221  | 0 | 2 | 1 | 1 | 1 | 2 | 2 | 2 | 4 | 4 | 0 | 0 | 1 | 1  | 1  | 1  | 0  | 0  | 0  |
| 205222  | 1 | 3 | 1 | 1 | 1 | 2 | 2 | 2 | 4 | 4 | 0 | 0 | 1 | 1  | 2  | 1  | 1  | 0  | 1  |
| 205223  | 1 | 1 | 1 | 1 | 1 | 2 | 1 | 2 | 4 | 4 | 0 | 0 | 1 | 1  | 3  | 1  | 1  | 0  | 1  |
| 205224  | 0 | 1 | 1 | 1 | 2 | 3 | 2 | 1 | 4 | 4 | 0 | 0 | 1 | 1  | 2  | 7  | 1  | 1  | 1  |
| 205225  | 1 | 2 | 1 | 3 | 1 | 2 | 1 | 2 | 4 | 4 | 0 | 0 | 1 | 1  | 3  | 1  | 1  | 0  | 1  |
| 205226  | 1 | 3 | 1 | 2 | 1 | 2 | 1 | 1 | 4 | 4 | 0 | 0 | 1 | 1  | 3  | 1  | 1  | 0  | 1  |
| 205227  | 0 | 4 | 1 | 1 | 1 | 2 | 2 | 2 | 4 | 4 | 0 | 0 | 1 | 1  | 3  | 1  | 1  | 0  | 1  |
| 205228  | 0 | 4 | 1 | 1 | 1 | 2 | 1 | 2 | 3 | 4 | 0 | 0 | 1 | 1  | 2  | 1  | 1  | 0  | 1  |
| 205229  | 0 | 1 | 1 | 4 | 1 | 2 | 2 | 2 | 3 | 2 | 0 | 0 | 1 | 1  | 2  | 1  | 1  | 0  | 1  |
| 2052210 | 1 | 5 | 1 | 1 | 1 | 4 | 2 | 2 | 3 | 1 | 0 | 0 | 1 | 1  | 2  | 1  | 1  | 0  | 1  |
| 2052211 | 0 | 3 | 1 | 2 | 1 | 2 | 2 | 2 | 3 | 1 | 0 | 0 | 1 | 1  | 1  | 1  | 0  | 0  | 0  |
| 2052212 | 0 | 1 | 1 | 4 | 1 | 2 | 2 | 1 | 3 | 1 | 0 | 0 | 1 | 1  | 1  | 1  | 0  | 0  | 0  |
| 2052213 | 0 | 4 | 1 | 3 | 2 | 1 | 2 | 2 | 3 | 2 | 0 | 0 | 1 | 1  | 2  | 1  | 1  | 0  | 1  |
| 2052214 | 0 | 4 | 1 | 2 | 2 | 1 | 2 | 2 | 3 | 2 | 0 | 0 | 1 | 1  | 2  | 1  | 1  | 0  | 1  |
| 2052215 | 0 | 3 | 1 | 3 | 1 | 2 | 2 | 2 | 3 | 1 | 0 | 0 | 1 | 1  | 1  | 1  | 0  | 0  | 0  |
| 2052216 | 0 | 2 | 1 | 1 | 1 | 2 | 1 | 2 | 3 | 2 | 0 | 0 | 1 | 1  | 1  | 2  | 0  | 0  | 0  |
| 2052217 | 0 | 2 | 1 | 2 | 1 | 2 | 1 | 2 | 3 | 3 | 0 | 0 | 1 | 1  | 1  | 1  | 0  | 0  | 0  |
| 2052218 | 0 | 1 | 1 | 2 | 1 | 2 | 1 | 1 | 3 | 4 | 0 | 0 | 1 | 1  | 2  | 1  | 1  | 0  | 1  |
| 2052219 | 0 | 5 | 1 | 1 | 1 | 2 | 1 | 2 | 3 | 4 | 0 | 0 | 1 | 1  | 2  | 1  | 1  | 0  | 1  |
| 2052220 | 0 | 2 | 1 | 2 | 1 | 2 | 2 | 2 | 3 | 4 | 0 | 0 | 1 | 1  | 3  | 1  | 1  | 0  | 1  |
| 2052221 | 0 | 3 | 1 | 2 | 1 | 2 | 2 | 2 | 3 | 4 | 0 | 0 | 1 | 1  | 3  | 1  | 1  | 0  | 1  |

|         |   |   |   |   |   |   |   |   |   |   |   |   |   |   |   |   |   |   |   |
|---------|---|---|---|---|---|---|---|---|---|---|---|---|---|---|---|---|---|---|---|
| 2052222 | 0 | 2 | 1 | 1 | 1 | 3 | 3 | 2 | 2 | 4 | 0 | 0 | 1 | 1 | 2 | 1 | 1 | 0 | 1 |
| 2052223 | 0 | 2 | 1 | 1 | 1 | 2 | 1 | 2 | 3 | 4 | 0 | 0 | 1 | 1 | 2 | 1 | 1 | 0 | 1 |
| 2052224 | 1 | 5 | 1 | 2 | 1 | 2 | 2 | 1 | 3 | 4 | 0 | 0 | 1 | 1 | 2 | 1 | 1 | 0 | 1 |
| 2052225 | 0 | 3 | 1 | 1 | 1 | 2 | 2 | 1 | 3 | 1 | 0 | 0 | 1 | 1 | 2 | 1 | 1 | 0 | 1 |
| 2052226 | 0 | 4 | 1 | 1 | 1 | 1 | 2 | 2 | 3 | 1 | 0 | 0 | 1 | 1 | 1 | 1 | 0 | 0 | 0 |
| 2052227 | 0 | 2 | 1 | 1 | 1 | 1 | 1 | 2 | 3 | 1 | 0 | 0 | 1 | 1 | 1 | 1 | 0 | 0 | 0 |
| 2052228 | 0 | 1 | 1 | 1 | 1 | 2 | 1 | 2 | 4 | 2 | 0 | 0 | 1 | 1 | 2 | 1 | 1 | 0 | 1 |
| 2052229 | 0 | 5 | 1 | 3 | 2 | 2 | 2 | 1 | 4 | 2 | 0 | 0 | 1 | 1 | 1 | 1 | 0 | 0 | 0 |
| 2052230 | 0 | 2 | 1 | 1 | 1 | 2 | 1 | 2 | 3 | 1 | 0 | 0 | 1 | 1 | 2 | 1 | 1 | 0 | 1 |
| 205231  | 0 | 1 | 1 | 5 | 1 | 5 | 2 | 1 | 3 | 1 | 0 | 0 | 1 | 1 | 2 | 1 | 1 | 0 | 1 |
| 205232  | 0 | 3 | 1 | 1 | 1 | 1 | 2 | 2 | 3 | 1 | 0 | 0 | 1 | 1 | 3 | 1 | 1 | 0 | 1 |
| 205233  | 0 | 1 | 1 | 4 | 1 | 2 | 2 | 2 | 3 | 1 | 0 | 0 | 1 | 1 | 1 | 1 | 0 | 0 | 0 |
| 205234  | 0 | 3 | 1 | 4 | 1 | 2 | 2 | 1 | 3 | 1 | 0 | 0 | 1 | 1 | 2 | 1 | 1 | 0 | 1 |
| 205235  | 1 | 2 | 1 | 3 | 1 | 3 | 3 | 1 | 3 | 1 | 1 | 0 | 1 | 1 | 4 | 1 | 1 | 0 | 1 |
| 205236  | 0 | 3 | 1 | 2 | 1 | 2 | 2 | 1 | 3 | 1 | 0 | 0 | 1 | 1 | 2 | 1 | 1 | 0 | 1 |
| 205237  | 0 | 2 | 1 | 2 | 1 | 3 | 2 | 2 | 4 | 2 | 0 | 0 | 1 | 1 | 1 | 1 | 0 | 0 | 0 |
| 205238  | 1 | 3 | 1 | 1 | 1 | 2 | 2 | 2 | 4 | 3 | 0 | 0 | 1 | 1 | 2 | 1 | 1 | 0 | 1 |
| 205239  | 0 | 1 | 1 | 3 | 2 | 1 | 1 | 2 | 4 | 4 | 0 | 0 | 1 | 1 | 3 | 1 | 1 | 0 | 1 |
| 2052310 | 1 | 3 | 1 | 1 | 1 | 2 | 2 | 2 | 4 | 4 | 0 | 0 | 1 | 1 | 3 | 1 | 1 | 0 | 1 |
| 2052311 | 1 | 2 | 1 | 1 | 1 | 4 | 1 | 2 | 4 | 2 | 0 | 0 | 1 | 1 | 2 | 1 | 1 | 0 | 1 |
| 2052312 | 1 | 3 | 1 | 1 | 1 | 4 | 2 | 2 | 4 | 3 | 0 | 0 | 1 | 1 | 2 | 1 | 1 | 0 | 1 |
| 2052313 | 0 | 3 | 1 | 2 | 1 | 2 | 2 | 1 | 4 | 4 | 0 | 0 | 1 | 1 | 2 | 1 | 1 | 0 | 1 |
| 2052314 | 0 | 3 | 1 | 5 | 1 | 5 | 2 | 2 | 4 | 4 | 0 | 0 | 1 | 1 | 1 | 1 | 0 | 0 | 0 |
| 2052315 | 0 | 2 | 1 | 1 | 1 | 2 | 2 | 2 | 4 | 2 | 0 | 0 | 1 | 1 | 2 | 1 | 1 | 0 | 1 |
| 2052316 | 1 | 5 | 1 | 1 | 1 | 2 | 2 | 2 | 4 | 3 | 0 | 0 | 1 | 1 | 3 | 1 | 1 | 0 | 1 |
| 2052317 | 0 | 1 | 1 | 1 | 1 | 2 | 2 | 1 | 4 | 4 | 0 | 0 | 1 | 1 | 3 | 1 | 1 | 0 | 1 |
| 2052318 | 1 | 5 | 1 | 4 | 1 | 5 | 3 | 2 | 4 | 4 | 1 | 1 | 1 | 1 | 1 | 1 | 0 | 0 | 0 |
| 2052319 | 1 | 5 | 1 | 5 | 1 | 5 | 3 | 2 | 4 | 1 | 0 | 0 | 1 | 1 | 1 | 1 | 0 | 0 | 0 |
| 2052320 | 0 | 2 | 1 | 2 | 1 | 3 | 3 | 2 | 3 | 1 | 1 | 1 | 1 | 1 | 2 | 1 | 1 | 0 | 1 |
| 2052321 | 1 | 5 | 1 | 4 | 1 | 2 | 2 | 2 | 3 | 1 | 0 | 0 | 1 | 1 | 2 | 1 | 1 | 0 | 1 |
| 2052322 | 0 | 4 | 1 | 1 | 1 | 2 | 2 | 2 | 3 | 1 | 0 | 0 | 1 | 1 | 3 | 1 | 1 | 0 | 1 |
| 2052323 | 1 | 5 | 1 | 1 | 1 | 2 | 2 | 2 | 3 | 1 | 0 | 0 | 1 | 1 | 4 | 1 | 1 | 0 | 1 |
| 2052324 | 0 | 1 | 1 | 1 | 1 | 2 | 1 | 2 | 3 | 1 | 0 | 0 | 1 | 1 | 2 | 1 | 1 | 0 | 1 |
| 2052325 | 1 | 3 | 1 | 1 | 1 | 2 | 2 | 2 | 3 | 1 | 0 | 0 | 1 | 1 | 3 | 1 | 1 | 0 | 1 |
| 2052326 | 0 | 1 | 1 | 2 | 1 | 2 | 2 | 2 | 3 | 1 | 0 | 0 | 1 | 1 | 3 | 1 | 1 | 0 | 1 |
| 2052327 | 1 | 5 | 1 | 1 | 1 | 2 | 1 | 1 | 3 | 1 | 0 | 0 | 1 | 1 | 2 | 1 | 1 | 0 | 1 |
| 2052328 | 1 | 3 | 1 | 2 | 1 | 2 | 2 | 2 | 3 | 1 | 0 | 0 | 1 | 1 | 1 | 1 | 0 | 0 | 0 |
| 2052329 | 1 | 1 | 1 | 1 | 1 | 2 | 2 | 1 | 4 | 1 | 0 | 0 | 1 | 1 | 2 | 6 | 1 | 1 | 1 |
| 2052330 | 0 | 1 | 1 | 1 | 1 | 1 | 1 | 2 | 4 | 1 | 0 | 0 | 1 | 1 | 1 | 1 | 0 | 0 | 0 |
| 205241  | 0 | 1 | 1 | 4 | 2 | 1 | 2 | 1 | 4 | 4 | 0 | 0 | 1 | 1 | 1 | 1 | 0 | 0 | 0 |
| 205242  | 0 | 3 | 1 | 2 | 1 | 2 | 3 | 2 | 4 | 3 | 0 | 0 | 1 | 1 | 1 | 6 | 0 | 1 | 1 |
| 205243  | 0 | 3 | 1 | 4 | 2 | 1 | 3 | 1 | 4 | 4 | 1 | 1 | 1 | 1 | 1 | 1 | 0 | 0 | 0 |
| 205244  | 0 | 3 | 1 | 3 | 2 | 1 | 3 | 2 | 4 | 3 | 1 | 1 | 1 | 1 | 1 | 1 | 0 | 0 | 0 |
| 205245  | 1 | 3 | 1 | 4 | 2 | 2 | 2 | 2 | 4 | 4 | 1 | 1 | 1 | 1 | 1 | 1 | 0 | 0 | 0 |
| 205246  | 0 | 4 | 1 | 5 | 2 | 5 | 3 | 2 | 4 | 4 | 1 | 1 | 1 | 1 | 1 | 1 | 0 | 0 | 0 |
| 205247  | 1 | 4 | 1 | 3 | 1 | 2 | 3 | 2 | 4 | 4 | 0 | 0 | 1 | 1 | 1 | 1 | 0 | 0 | 0 |
| 205248  | 1 | 3 | 1 | 2 | 1 | 4 | 2 | 2 | 4 | 4 | 0 | 0 | 1 | 1 | 2 | 5 | 1 | 1 | 1 |
| 205249  | 0 | 2 | 1 | 2 | 2 | 1 | 2 | 2 | 4 | 4 | 0 | 0 | 1 | 1 | 3 | 1 | 1 | 0 | 1 |
| 2052410 | 0 | 2 | 1 | 2 | 1 | 1 | 3 | 2 | 4 | 4 | 0 | 0 | 1 | 1 | 3 | 1 | 1 | 0 | 1 |
| 2052411 | 1 | 2 | 1 | 1 | 1 | 4 | 3 | 1 | 4 | 4 | 1 | 0 | 1 | 1 | 1 | 1 | 0 | 0 | 0 |
| 2052412 | 0 | 4 | 1 | 3 | 2 | 3 | 3 | 1 | 4 | 4 | 1 | 1 | 1 | 1 | 1 | 1 | 0 | 0 | 0 |
| 2052413 | 1 | 5 | 1 | 3 | 1 | 4 | 2 | 2 | 4 | 4 | 0 | 0 | 1 | 1 | 1 | 1 | 0 | 0 | 0 |
| 2052414 | 1 | 4 | 1 | 2 | 2 | 2 | 3 | 2 | 4 | 4 | 0 | 0 | 1 | 1 | 3 | 1 | 1 | 0 | 1 |
| 2052415 | 0 | 3 | 1 | 4 | 1 | 5 | 3 | 2 | 4 | 2 | 1 | 1 | 1 | 1 | 1 | 1 | 0 | 0 | 0 |
| 2052416 | 1 | 4 | 1 | 1 | 1 | 2 | 2 | 2 | 4 | 3 | 0 | 0 | 1 | 1 | 1 | 6 | 0 | 1 | 1 |
| 2052417 | 0 | 3 | 1 | 5 | 2 | 5 | 3 | 1 | 4 | 3 | 0 | 0 | 1 | 1 | 1 | 1 | 0 | 0 | 0 |

|         |   |   |   |   |   |   |   |   |   |   |   |   |   |   |   |   |   |   |   |
|---------|---|---|---|---|---|---|---|---|---|---|---|---|---|---|---|---|---|---|---|
| 2052418 | 1 | 3 | 1 | 1 | 1 | 5 | 2 | 2 | 4 | 4 | 0 | 0 | 1 | 1 | 3 | 1 | 1 | 0 | 1 |
| 2052419 | 0 | 1 | 1 | 1 | 1 | 1 | 2 | 2 | 4 | 2 | 0 | 0 | 1 | 1 | 2 | 1 | 1 | 0 | 1 |
| 2052420 | 0 | 2 | 1 | 1 | 1 | 1 | 3 | 2 | 4 | 3 | 1 | 1 | 1 | 1 | 3 | 1 | 1 | 0 | 1 |
| 2052421 | 1 | 5 | 1 | 1 | 1 | 2 | 2 | 2 | 4 | 4 | 0 | 0 | 1 | 1 | 2 | 1 | 1 | 0 | 1 |
| 2052422 | 1 | 1 | 1 | 3 | 2 | 5 | 3 | 2 | 4 | 4 | 0 | 0 | 1 | 1 | 1 | 1 | 0 | 0 | 0 |
| 2052423 | 0 | 1 | 1 | 4 | 2 | 1 | 2 | 1 | 4 | 4 | 0 | 0 | 1 | 1 | 3 | 6 | 1 | 1 | 1 |
| 2052424 | 0 | 2 | 1 | 2 | 2 | 1 | 2 | 1 | 4 | 4 | 0 | 0 | 1 | 1 | 1 | 1 | 0 | 0 | 0 |
| 2052425 | 1 | 3 | 1 | 2 | 1 | 4 | 3 | 2 | 4 | 4 | 0 | 0 | 1 | 1 | 2 | 1 | 1 | 0 | 1 |
| 2052426 | 1 | 3 | 1 | 2 | 1 | 4 | 3 | 2 | 4 | 4 | 0 | 0 | 1 | 1 | 1 | 1 | 0 | 0 | 0 |
| 2052427 | 0 | 2 | 1 | 3 | 1 | 1 | 3 | 1 | 4 | 4 | 1 | 1 | 1 | 1 | 2 | 1 | 1 | 0 | 1 |
| 2052428 | 1 | 3 | 1 | 4 | 2 | 4 | 3 | 1 | 4 | 4 | 1 | 1 | 1 | 1 | 3 | 1 | 1 | 0 | 1 |
| 2052429 | 0 | 4 | 1 | 1 | 1 | 1 | 3 | 2 | 4 | 2 | 0 | 0 | 1 | 1 | 3 | 1 | 1 | 0 | 1 |
| 2052430 | 0 | 5 | 1 | 1 | 2 | 3 | 2 | 1 | 4 | 4 | 0 | 0 | 1 | 1 | 4 | 1 | 1 | 0 | 1 |
| 205251  | 0 | 2 | 1 | 2 | 1 | 2 | 2 | 1 | 2 | 1 | 0 | 0 | 1 | 1 | 1 | 1 | 0 | 0 | 0 |
| 205252  | 0 | 3 | 1 | 1 | 1 | 2 | 1 | 1 | 2 | 1 | 0 | 0 | 1 | 1 | 3 | 1 | 1 | 0 | 1 |
| 205253  | 0 | 2 | 1 | 4 | 1 | 1 | 2 | 2 | 2 | 1 | 0 | 0 | 1 | 1 | 2 | 1 | 1 | 0 | 1 |
| 205254  | 1 | 5 | 1 | 2 | 1 | 2 | 2 | 1 | 2 | 1 | 0 | 0 | 1 | 1 | 3 | 1 | 1 | 0 | 1 |
| 205255  | 0 | 2 | 1 | 1 | 1 | 3 | 1 | 2 | 2 | 1 | 0 | 0 | 1 | 1 | 2 | 1 | 1 | 0 | 1 |
| 205256  | 0 | 2 | 1 | 2 | 1 | 1 | 2 | 2 | 2 | 1 | 0 | 0 | 1 | 1 | 2 | 1 | 1 | 0 | 1 |
| 205257  | 0 | 2 | 1 | 2 | 1 | 2 | 2 | 2 | 2 | 1 | 0 | 0 | 1 | 1 | 3 | 1 | 1 | 0 | 1 |
| 205258  | 1 | 2 | 1 | 1 | 1 | 2 | 1 | 1 | 2 | 1 | 0 | 0 | 1 | 1 | 3 | 1 | 1 | 0 | 1 |
| 205259  | 0 | 3 | 1 | 1 | 2 | 2 | 1 | 2 | 2 | 1 | 0 | 0 | 1 | 1 | 1 | 1 | 0 | 0 | 0 |
| 2052510 | 1 | 5 | 1 | 1 | 1 | 2 | 1 | 1 | 2 | 1 | 0 | 0 | 1 | 1 | 3 | 1 | 1 | 0 | 1 |
| 2052511 | 1 | 2 | 1 | 2 | 1 | 2 | 1 | 2 | 2 | 1 | 0 | 0 | 1 | 1 | 3 | 1 | 1 | 0 | 1 |
| 2052512 | 0 | 1 | 1 | 2 | 1 | 2 | 1 | 2 | 2 | 1 | 0 | 0 | 1 | 1 | 2 | 1 | 1 | 0 | 1 |
| 2052513 | 0 | 2 | 1 | 1 | 1 | 2 | 1 | 2 | 2 | 1 | 0 | 0 | 1 | 1 | 2 | 1 | 1 | 0 | 1 |
| 2052514 | 0 | 2 | 1 | 4 | 1 | 2 | 2 | 2 | 2 | 1 | 0 | 0 | 1 | 1 | 2 | 1 | 1 | 0 | 1 |
| 2052515 | 0 | 2 | 1 | 2 | 1 | 2 | 2 | 2 | 2 | 1 | 1 | 0 | 1 | 1 | 3 | 1 | 1 | 0 | 1 |
| 2052516 | 0 | 2 | 1 | 4 | 1 | 3 | 2 | 2 | 2 | 1 | 0 | 0 | 1 | 1 | 1 | 1 | 0 | 0 | 0 |
| 2052517 | 0 | 2 | 1 | 1 | 1 | 2 | 1 | 1 | 2 | 2 | 0 | 0 | 1 | 1 | 2 | 1 | 1 | 0 | 1 |
| 2052518 | 0 | 2 | 1 | 1 | 1 | 2 | 1 | 2 | 2 | 2 | 0 | 0 | 1 | 1 | 2 | 1 | 1 | 0 | 1 |
| 2052519 | 1 | 2 | 1 | 1 | 1 | 2 | 1 | 2 | 2 | 1 | 0 | 0 | 1 | 1 | 3 | 1 | 1 | 0 | 1 |
| 2052520 | 0 | 1 | 1 | 1 | 1 | 2 | 2 | 2 | 2 | 1 | 0 | 0 | 1 | 1 | 2 | 1 | 1 | 0 | 1 |
| 2052521 | 0 | 3 | 1 | 1 | 1 | 2 | 1 | 2 | 3 | 1 | 0 | 0 | 1 | 1 | 2 | 1 | 1 | 0 | 1 |
| 2052522 | 0 | 2 | 1 | 1 | 1 | 2 | 2 | 2 | 2 | 1 | 0 | 0 | 1 | 1 | 2 | 1 | 1 | 0 | 1 |
| 2052523 | 0 | 3 | 1 | 1 | 1 | 2 | 2 | 2 | 3 | 1 | 0 | 0 | 1 | 1 | 3 | 1 | 1 | 0 | 1 |
| 2052524 | 0 | 3 | 1 | 1 | 1 | 2 | 2 | 2 | 3 | 1 | 0 | 0 | 1 | 1 | 2 | 1 | 1 | 0 | 1 |
| 2052525 | 0 | 3 | 1 | 2 | 1 | 3 | 3 | 2 | 3 | 2 | 0 | 0 | 1 | 1 | 2 | 1 | 1 | 0 | 1 |
| 2052526 | 0 | 2 | 1 | 2 | 1 | 2 | 1 | 2 | 3 | 2 | 0 | 0 | 1 | 1 | 2 | 1 | 1 | 0 | 1 |
| 2052527 | 0 | 1 | 1 | 1 | 1 | 1 | 2 | 1 | 3 | 3 | 0 | 0 | 1 | 1 | 2 | 1 | 1 | 0 | 1 |
| 2052528 | 1 | 3 | 1 | 1 | 1 | 2 | 2 | 2 | 3 | 3 | 0 | 0 | 1 | 1 | 2 | 1 | 1 | 0 | 1 |
| 2052529 | 0 | 3 | 1 | 1 | 1 | 2 | 1 | 2 | 2 | 1 | 0 | 0 | 1 | 1 | 1 | 1 | 0 | 0 | 0 |
| 2052530 | 1 | 3 | 1 | 3 | 1 | 3 | 2 | 2 | 2 | 2 | 0 | 0 | 1 | 1 | 2 | 1 | 1 | 0 | 1 |
| 206261  | 1 | 3 | 1 | 2 | 1 | 2 | 2 | 1 | 3 | 2 | 0 | 0 | 1 | 1 | 1 | 1 | 0 | 0 | 0 |
| 206262  | 1 | 1 | 1 | 2 | 1 | 2 | 1 | 1 | 3 | 2 | 0 | 0 | 1 | 1 | 3 | 1 | 1 | 0 | 1 |
| 206263  | 1 | 3 | 1 | 3 | 1 | 2 | 2 | 2 | 3 | 1 | 0 | 0 | 1 | 1 | 1 | 1 | 0 | 0 | 0 |
| 206264  | 1 | 2 | 1 | 4 | 1 | 2 | 2 | 2 | 3 | 1 | 0 | 0 | 1 | 1 | 1 | 1 | 0 | 0 | 0 |
| 206265  | 1 | 4 | 1 | 2 | 1 | 2 | 2 | 2 | 3 | 1 | 0 | 0 | 1 | 1 | 1 | 1 | 0 | 0 | 0 |
| 206266  | 0 | 1 | 1 | 2 | 1 | 2 | 1 | 1 | 3 | 3 | 0 | 0 | 1 | 1 | 3 | 1 | 1 | 0 | 1 |
| 206267  | 1 | 2 | 1 | 3 | 1 | 2 | 2 | 1 | 3 | 2 | 0 | 0 | 1 | 1 | 1 | 1 | 0 | 0 | 0 |
| 206268  | 0 | 1 | 1 | 4 | 1 | 1 | 2 | 2 | 3 | 3 | 0 | 0 | 1 | 1 | 1 | 1 | 0 | 0 | 0 |
| 206269  | 0 | 4 | 1 | 2 | 1 | 2 | 2 | 2 | 3 | 4 | 0 | 0 | 1 | 1 | 1 | 1 | 0 | 0 | 0 |
| 2062610 | 0 | 1 | 1 | 2 | 1 | 2 | 2 | 2 | 3 | 4 | 0 | 0 | 1 | 1 | 3 | 1 | 1 | 0 | 1 |
| 2062611 | 0 | 2 | 1 | 1 | 1 | 2 | 1 | 1 | 3 | 4 | 0 | 0 | 1 | 1 | 1 | 1 | 0 | 0 | 0 |
| 2062612 | 0 | 1 | 1 | 4 | 1 | 2 | 1 | 2 | 3 | 4 | 0 | 0 | 1 | 1 | 1 | 1 | 0 | 0 | 0 |
| 2062613 | 0 | 3 | 1 | 1 | 1 | 2 | 2 | 2 | 3 | 4 | 0 | 0 | 1 | 1 | 3 | 1 | 1 | 0 | 1 |

|         |   |   |   |   |   |   |   |   |   |   |   |   |   |   |   |   |   |   |   |
|---------|---|---|---|---|---|---|---|---|---|---|---|---|---|---|---|---|---|---|---|
| 2062614 | 0 | 3 | 1 | 2 | 1 | 2 | 2 | 1 | 3 | 4 | 1 | 1 | 1 | 1 | 1 | 0 | 0 | 0 |   |
| 2062615 | 1 | 4 | 1 | 1 | 1 | 2 | 1 | 1 | 3 | 3 | 0 | 0 | 1 | 1 | 3 | 1 | 1 | 0 | 1 |
| 2062616 | 1 | 3 | 1 | 1 | 1 | 2 | 1 | 1 | 3 | 4 | 0 | 0 | 1 | 1 | 3 | 1 | 1 | 0 | 1 |
| 2062617 | 0 | 1 | 1 | 3 | 1 | 5 | 1 | 2 | 3 | 3 | 0 | 0 | 1 | 1 | 2 | 1 | 1 | 0 | 1 |
| 2062618 | 1 | 5 | 1 | 1 | 1 | 2 | 2 | 2 | 3 | 3 | 0 | 0 | 1 | 1 | 2 | 1 | 1 | 0 | 1 |
| 2062619 | 0 | 2 | 1 | 2 | 1 | 2 | 2 | 2 | 3 | 4 | 0 | 0 | 1 | 1 | 3 | 1 | 1 | 0 | 1 |
| 2062620 | 0 | 2 | 1 | 1 | 1 | 2 | 2 | 2 | 3 | 2 | 0 | 0 | 1 | 1 | 2 | 1 | 1 | 0 | 1 |
| 2062621 | 0 | 2 | 1 | 1 | 1 | 1 | 1 | 2 | 3 | 2 | 0 | 0 | 1 | 1 | 1 | 1 | 0 | 0 | 0 |
| 2062622 | 0 | 2 | 1 | 1 | 1 | 3 | 3 | 2 | 3 | 1 | 0 | 0 | 1 | 1 | 1 | 1 | 0 | 0 | 0 |
| 2062623 | 0 | 4 | 1 | 1 | 1 | 2 | 2 | 1 | 3 | 2 | 0 | 0 | 1 | 1 | 3 | 1 | 1 | 0 | 1 |
| 2062624 | 1 | 3 | 1 | 2 | 1 | 2 | 2 | 2 | 3 | 1 | 0 | 0 | 1 | 1 | 1 | 1 | 0 | 0 | 0 |
| 2062625 | 1 | 3 | 1 | 3 | 1 | 2 | 2 | 1 | 3 | 2 | 0 | 0 | 1 | 1 | 3 | 1 | 1 | 0 | 1 |
| 206271  | 0 | 4 | 1 | 1 | 1 | 2 | 1 | 2 | 3 | 1 | 0 | 0 | 1 | 1 | 2 | 1 | 1 | 0 | 1 |
| 206272  | 0 | 1 | 1 | 4 | 1 | 2 | 3 | 1 | 3 | 1 | 0 | 0 | 1 | 1 | 2 | 1 | 1 | 0 | 1 |
| 206273  | 0 | 2 | 1 | 2 | 1 | 2 | 2 | 2 | 3 | 1 | 0 | 0 | 1 | 1 | 2 | 1 | 1 | 0 | 1 |
| 206274  | 0 | 1 | 1 | 2 | 1 | 1 | 3 | 1 | 3 | 1 | 0 | 0 | 1 | 1 | 2 | 1 | 1 | 0 | 1 |
| 206275  | 1 | 1 | 1 | 1 | 1 | 2 | 1 | 2 | 3 | 1 | 0 | 0 | 1 | 1 | 2 | 1 | 1 | 0 | 1 |
| 206276  | 0 | 3 | 1 | 2 | 1 | 2 | 2 | 2 | 3 | 4 | 0 | 0 | 1 | 1 | 2 | 1 | 1 | 0 | 1 |
| 206277  | 1 | 1 | 1 | 4 | 1 | 2 | 2 | 1 | 3 | 4 | 0 | 0 | 1 | 1 | 1 | 1 | 0 | 0 | 0 |
| 206278  | 0 | 2 | 1 | 4 | 1 | 2 | 2 | 1 | 3 | 4 | 0 | 0 | 1 | 1 | 2 | 1 | 1 | 0 | 1 |
| 206279  | 1 | 3 | 1 | 2 | 1 | 2 | 1 | 2 | 3 | 4 | 0 | 0 | 1 | 1 | 1 | 1 | 0 | 0 | 0 |
| 2062710 | 0 | 2 | 1 | 2 | 1 | 2 | 1 | 1 | 3 | 4 | 0 | 0 | 1 | 1 | 1 | 1 | 0 | 0 | 0 |
| 2062711 | 0 | 3 | 1 | 1 | 1 | 2 | 1 | 2 | 1 | 2 | 0 | 0 | 1 | 1 | 2 | 1 | 1 | 0 | 1 |
| 2062712 | 0 | 2 | 1 | 1 | 1 | 2 | 2 | 1 | 3 | 4 | 0 | 0 | 1 | 1 | 1 | 1 | 0 | 0 | 0 |
| 2062713 | 1 | 1 | 1 | 3 | 1 | 2 | 2 | 2 | 3 | 4 | 0 | 0 | 1 | 1 | 1 | 1 | 0 | 0 | 0 |
| 2062714 | 1 | 1 | 1 | 2 | 1 | 2 | 2 | 1 | 3 | 4 | 0 | 0 | 1 | 1 | 2 | 1 | 1 | 0 | 1 |
| 2062715 | 1 | 1 | 1 | 1 | 1 | 2 | 2 | 2 | 3 | 4 | 0 | 0 | 1 | 1 | 1 | 1 | 0 | 0 | 0 |
| 2062716 | 1 | 2 | 1 | 3 | 1 | 2 | 1 | 2 | 3 | 4 | 0 | 0 | 1 | 1 | 1 | 1 | 0 | 0 | 0 |
| 2062717 | 0 | 1 | 1 | 3 | 1 | 2 | 2 | 1 | 3 | 4 | 0 | 0 | 1 | 1 | 2 | 1 | 1 | 0 | 1 |
| 2062718 | 1 | 1 | 1 | 1 | 1 | 2 | 1 | 1 | 3 | 4 | 0 | 0 | 1 | 1 | 2 | 1 | 1 | 0 | 1 |
| 2062719 | 0 | 2 | 1 | 2 | 1 | 2 | 2 | 1 | 3 | 4 | 0 | 0 | 1 | 1 | 2 | 1 | 1 | 0 | 1 |
| 2062720 | 0 | 1 | 1 | 3 | 1 | 1 | 2 | 1 | 3 | 4 | 0 | 0 | 1 | 1 | 2 | 1 | 1 | 0 | 1 |
| 2062721 | 1 | 4 | 1 | 1 | 1 | 2 | 1 | 2 | 3 | 4 | 0 | 0 | 1 | 1 | 2 | 1 | 1 | 0 | 1 |
| 2062722 | 0 | 2 | 1 | 3 | 1 | 2 | 1 | 2 | 3 | 4 | 0 | 0 | 1 | 1 | 1 | 1 | 0 | 0 | 0 |
| 2062723 | 1 | 3 | 1 | 2 | 1 | 2 | 1 | 2 | 3 | 4 | 0 | 0 | 1 | 1 | 1 | 1 | 0 | 0 | 0 |
| 2062724 | 0 | 2 | 1 | 2 | 1 | 2 | 2 | 2 | 3 | 4 | 0 | 0 | 1 | 1 | 1 | 1 | 0 | 0 | 0 |
| 2062725 | 1 | 2 | 1 | 2 | 1 | 2 | 2 | 2 | 3 | 4 | 0 | 0 | 1 | 1 | 1 | 1 | 0 | 0 | 0 |
| 2062726 | 1 | 1 | 1 | 1 | 1 | 2 | 1 | 1 | 1 | 2 | 0 | 0 | 1 | 1 | 4 | 5 | 1 | 1 | 1 |
| 2062727 | 1 | 3 | 1 | 1 | 1 | 2 | 2 | 2 | 3 | 2 | 0 | 0 | 1 | 1 | 3 | 6 | 1 | 1 | 1 |
| 2062728 | 0 | 1 | 1 | 2 | 1 | 2 | 2 | 2 | 3 | 2 | 0 | 0 | 1 | 1 | 2 | 1 | 1 | 0 | 1 |
| 2062729 | 0 | 3 | 1 | 1 | 1 | 2 | 2 | 2 | 3 | 2 | 0 | 0 | 1 | 1 | 2 | 1 | 1 | 0 | 1 |
| 2062730 | 0 | 2 | 1 | 2 | 1 | 1 | 1 | 2 | 3 | 2 | 0 | 0 | 1 | 1 | 2 | 1 | 1 | 0 | 1 |
| 206281  | 0 | 3 | 1 | 3 | 1 | 1 | 2 | 2 | 3 | 3 | 0 | 0 | 1 | 1 | 2 | 2 | 1 | 0 | 1 |
| 206282  | 1 | 2 | 1 | 4 | 1 | 2 | 2 | 2 | 3 | 2 | 0 | 0 | 1 | 1 | 5 | 5 | 1 | 1 | 1 |
| 206283  | 1 | 3 | 1 | 2 | 1 | 2 | 2 | 2 | 3 | 1 | 0 | 0 | 1 | 1 | 1 | 1 | 0 | 0 | 0 |
| 206284  | 1 | 3 | 1 | 2 | 1 | 2 | 2 | 2 | 3 | 1 | 0 | 0 | 1 | 1 | 2 | 1 | 1 | 0 | 1 |
| 206285  | 0 | 2 | 1 | 2 | 1 | 3 | 2 | 2 | 3 | 1 | 0 | 0 | 1 | 1 | 3 | 1 | 1 | 0 | 1 |
| 206286  | 0 | 5 | 1 | 2 | 1 | 1 | 2 | 2 | 3 | 1 | 0 | 0 | 1 | 1 | 2 | 1 | 1 | 0 | 1 |
| 206287  | 0 | 2 | 1 | 2 | 1 | 3 | 2 | 2 | 3 | 1 | 0 | 0 | 1 | 1 | 2 | 1 | 1 | 0 | 1 |
| 206288  | 0 | 2 | 1 | 1 | 1 | 1 | 2 | 2 | 2 | 4 | 0 | 0 | 1 | 1 | 2 | 1 | 1 | 0 | 1 |
| 206289  | 0 | 1 | 1 | 4 | 1 | 1 | 2 | 2 | 2 | 4 | 0 | 0 | 1 | 1 | 4 | 1 | 1 | 0 | 1 |
| 2062810 | 1 | 2 | 1 | 1 | 1 | 2 | 2 | 2 | 2 | 4 | 0 | 0 | 1 | 1 | 2 | 1 | 1 | 0 | 1 |
| 2062811 | 1 | 4 | 1 | 1 | 1 | 2 | 1 | 2 | 2 | 4 | 0 | 0 | 1 | 0 | 5 | 5 | 1 | 1 | 1 |
| 2062812 | 1 | 2 | 1 | 1 | 1 | 2 | 1 | 2 | 2 | 4 | 0 | 0 | 1 | 1 | 4 | 2 | 1 | 0 | 1 |
| 2062813 | 0 | 1 | 1 | 3 | 1 | 3 | 1 | 1 | 2 | 4 | 0 | 0 | 1 | 1 | 2 | 1 | 1 | 0 | 1 |
| 2062814 | 1 | 4 | 1 | 4 | 2 | 2 | 2 | 2 | 1 | 1 | 0 | 0 | 1 | 1 | 4 | 2 | 1 | 0 | 1 |

|         |   |   |   |   |   |   |   |   |   |   |   |   |   |    |    |    |    |    |    |
|---------|---|---|---|---|---|---|---|---|---|---|---|---|---|----|----|----|----|----|----|
| 2062815 | 0 | 3 | 1 | 2 | 1 | 1 | 1 | 2 | 1 | 3 | 0 | 0 | 1 | 1  | 5  | 5  | 1  | 1  | 1  |
| 2062816 | 1 | 1 | 1 | 2 | 2 | 2 | 2 | 1 | 1 | 2 | 0 | 0 | 1 | 1  | 2  | 2  | 1  | 0  | 1  |
| 2062817 | 0 | 4 | 1 | 2 | 1 | 1 | 2 | 2 | 1 | 1 | 0 | 0 | 1 | 1  | 1  | 1  | 0  | 0  | 0  |
| 2062818 | 0 | 3 | 1 | 1 | 1 | 1 | 2 | 2 | 2 | 4 | 0 | 0 | 1 | 1  | 4  | 1  | 1  | 0  | 1  |
| 2062819 | 0 | 4 | 1 | 2 | 2 | 5 | 2 | 2 | 1 | 2 | 0 | 0 | 1 | 1  | 2  | 1  | 1  | 0  | 1  |
| 2062820 | 1 | 4 | 1 | 1 | 2 | 2 | 3 | 2 | 1 | 4 | 0 | 0 | 1 | 0  | 5  | 5  | 1  | 1  | 1  |
| 2062821 | 0 | 3 | 1 | 1 | 2 | 2 | 2 | 2 | 2 | 1 | 0 | 0 | 1 | 1  | 3  | 2  | 1  | 0  | 1  |
| 2062822 | 1 | 3 | 1 | 2 | 2 | 2 | 3 | 2 | 1 | 2 | 0 | 0 | 1 | 1  | 1  | 6  | 0  | 1  | 1  |
| 2062823 | 1 | 3 | 1 | 1 | 1 | 2 | 3 | 2 | 1 | 1 | 0 | 0 | 1 | 1  | 2  | 1  | 1  | 0  | 1  |
| 2062824 | 0 | 3 | 1 | 1 | 2 | 2 | 2 | 2 | 1 | 1 | 0 | 0 | 1 | 1  | 1  | 1  | 0  | 0  | 0  |
| 2062825 | 0 | 2 | 1 | 2 | 2 | 1 | 2 | 2 | 1 | 1 | 0 | 0 | 1 | 1  | 1  | 1  | 0  | 0  | 0  |
| 2062826 | 1 | 3 | 1 | 1 | 2 | 2 | 1 | 1 | 1 | 1 | 0 | 0 | 1 | 1  | 3  | 5  | 1  | 1  | 1  |
| 2062827 | 1 | 3 | 1 | 4 | 1 | 3 | 3 | 2 | 1 | 2 | 0 | 0 | 1 | 1  | 5  | 7  | 1  | 1  | 1  |
| 2062828 | 1 | 5 | 1 | 2 | 1 | 2 | 2 | 1 | 3 | 3 | 0 | 0 | 1 | 1  | 2  | 2  | 1  | 0  | 1  |
| 2062829 | 1 | 5 | 1 | 1 | 1 | 2 | 2 | 2 | 3 | 1 | 0 | 0 | 1 | 1  | 3  | 1  | 1  | 0  | 1  |
| 2062830 | 1 | 4 | 1 | 4 | 2 | 2 | 3 | 2 | 1 | 1 | 0 | 0 | 1 | 1  | 1  | 1  | 0  | 0  | 0  |
| 206291  | 1 | 5 | 1 | 1 | 1 | 2 | 2 | 1 | 1 | 1 | 0 | 0 | 1 | 1  | 2  | 1  | 1  | 0  | 1  |
| 206292  | 0 | 3 | 1 | 2 | 1 | 2 | 2 | 2 | 1 | 1 | 0 | 0 | 1 | 1  | 1  | 1  | 0  | 0  | 0  |
| 206293  | 0 | 3 | 1 | 1 | 1 | 3 | 2 | 1 | 1 | 2 | 0 | 0 | 1 | 1  | 1  | 1  | 0  | 0  | 0  |
| 206294  | 1 | 2 | 1 | 2 | 1 | 2 | 2 | 2 | 1 | 3 | 0 | 0 | 1 | 1  | 2  | 1  | 1  | 0  | 1  |
| 206295  | 1 | 5 | 1 | 1 | 1 | 2 | 2 | 2 | 1 | 2 | 1 | 0 | 1 | 1  | 2  | 1  | 1  | 0  | 1  |
| 206296  | 0 | 4 | 1 | 1 | 1 | 2 | 2 | 2 | 1 | 3 | 0 | 0 | 1 | 1  | 4  | 1  | 1  | 0  | 1  |
| 206297  | 1 | 5 | 1 | 1 | 1 | 2 | 2 | 2 | 1 | 4 | 0 | 0 | 1 | 1  | 2  | 1  | 1  | 0  | 1  |
| 206298  | 1 | 5 | 1 | 1 | 1 | 2 | 1 | 1 | 1 | 4 | 0 | 0 | 0 | 99 | 99 | 99 | 99 | 99 | 99 |
| 206299  | 0 | 4 | 1 | 2 | 1 | 2 | 3 | 2 | 1 | 4 | 0 | 0 | 1 | 1  | 1  | 1  | 0  | 0  | 0  |
| 2062910 | 1 | 5 | 1 | 1 | 1 | 2 | 3 | 1 | 1 | 4 | 0 | 0 | 0 | 99 | 99 | 99 | 99 | 99 | 99 |
| 2062911 | 0 | 2 | 1 | 2 | 2 | 1 | 2 | 2 | 1 | 4 | 1 | 1 | 1 | 1  | 2  | 1  | 1  | 0  | 1  |
| 2062912 | 0 | 3 | 1 | 1 | 2 | 2 | 2 | 2 | 1 | 4 | 0 | 0 | 1 | 1  | 2  | 1  | 1  | 0  | 1  |
| 2062913 | 0 | 2 | 1 | 1 | 1 | 2 | 2 | 2 | 1 | 1 | 0 | 0 | 1 | 1  | 1  | 1  | 0  | 0  | 0  |
| 2062914 | 0 | 3 | 1 | 1 | 1 | 2 | 2 | 2 | 1 | 1 | 0 | 0 | 1 | 1  | 2  | 1  | 1  | 0  | 1  |
| 2062915 | 1 | 1 | 1 | 5 | 1 | 4 | 2 | 2 | 1 | 1 | 1 | 1 | 1 | 1  | 1  | 1  | 0  | 0  | 0  |
| 2062916 | 1 | 2 | 1 | 4 | 1 | 5 | 3 | 2 | 1 | 1 | 1 | 1 | 1 | 1  | 2  | 1  | 1  | 0  | 1  |
| 2062917 | 1 | 5 | 1 | 1 | 1 | 2 | 2 | 2 | 1 | 3 | 0 | 0 | 1 | 1  | 1  | 1  | 0  | 0  | 0  |
| 2062918 | 0 | 2 | 1 | 3 | 1 | 1 | 2 | 2 | 1 | 2 | 0 | 0 | 1 | 1  | 2  | 1  | 1  | 0  | 1  |
| 2062919 | 0 | 3 | 1 | 1 | 1 | 1 | 2 | 2 | 1 | 1 | 0 | 0 | 1 | 1  | 2  | 4  | 1  | 1  | 1  |
| 2062920 | 0 | 1 | 1 | 4 | 1 | 3 | 3 | 2 | 1 | 1 | 0 | 0 | 1 | 1  | 2  | 6  | 1  | 1  | 1  |
| 2062921 | 1 | 3 | 1 | 2 | 1 | 2 | 3 | 2 | 1 | 1 | 0 | 0 | 1 | 1  | 1  | 1  | 0  | 0  | 0  |
| 2062922 | 0 | 2 | 1 | 1 | 1 | 1 | 2 | 2 | 1 | 2 | 0 | 0 | 1 | 1  | 3  | 1  | 1  | 0  | 1  |
| 2062923 | 0 | 3 | 1 | 4 | 1 | 1 | 2 | 2 | 1 | 3 | 0 | 0 | 1 | 1  | 2  | 1  | 1  | 0  | 1  |
| 2062924 | 1 | 4 | 1 | 1 | 1 | 2 | 3 | 2 | 1 | 1 | 0 | 0 | 1 | 1  | 3  | 6  | 1  | 1  | 1  |
| 2062925 | 1 | 2 | 1 | 1 | 1 | 2 | 2 | 2 | 1 | 1 | 0 | 0 | 1 | 1  | 2  | 1  | 1  | 0  | 1  |
| 2062926 | 0 | 2 | 1 | 2 | 1 | 1 | 2 | 2 | 1 | 1 | 0 | 0 | 1 | 1  | 2  | 5  | 1  | 1  | 1  |
| 2062927 | 0 | 2 | 1 | 2 | 1 | 1 | 2 | 2 | 1 | 1 | 0 | 0 | 1 | 1  | 1  | 2  | 0  | 0  | 0  |
| 2062928 | 0 | 2 | 1 | 1 | 1 | 1 | 2 | 2 | 1 | 2 | 0 | 0 | 1 | 1  | 1  | 1  | 0  | 0  | 0  |
| 2062929 | 0 | 2 | 1 | 1 | 1 | 1 | 2 | 2 | 1 | 3 | 0 | 0 | 1 | 1  | 2  | 1  | 1  | 0  | 1  |
| 2062930 | 1 | 4 | 1 | 2 | 1 | 2 | 2 | 2 | 1 | 3 | 0 | 0 | 1 | 1  | 2  | 2  | 1  | 0  | 1  |
| 206301  | 0 | 5 | 1 | 2 | 1 | 3 | 2 | 1 | 1 | 1 | 0 | 0 | 1 | 1  | 1  | 1  | 0  | 0  | 0  |
| 206302  | 0 | 4 | 1 | 1 | 1 | 3 | 2 | 1 | 1 | 2 | 0 | 0 | 1 | 1  | 1  | 1  | 0  | 0  | 0  |
| 206303  | 0 | 5 | 1 | 4 | 2 | 1 | 1 | 1 | 1 | 1 | 0 | 0 | 0 | 99 | 99 | 99 | 99 | 99 | 99 |
| 206304  | 0 | 1 | 1 | 4 | 2 | 1 | 2 | 1 | 1 | 4 | 1 | 1 | 1 | 1  | 1  | 1  | 0  | 0  | 0  |
| 206305  | 0 | 5 | 1 | 1 | 1 | 3 | 2 | 1 | 1 | 2 | 0 | 0 | 0 | 99 | 99 | 99 | 99 | 99 | 99 |
| 206306  | 1 | 4 | 1 | 3 | 1 | 2 | 2 | 2 | 1 | 1 | 0 | 0 | 1 | 1  | 1  | 1  | 0  | 0  | 0  |
| 206307  | 1 | 3 | 1 | 3 | 1 | 4 | 2 | 1 | 1 | 1 | 0 | 0 | 1 | 1  | 1  | 1  | 0  | 0  | 0  |
| 206308  | 0 | 5 | 1 | 1 | 1 | 1 | 2 | 1 | 1 | 3 | 0 | 0 | 0 | 99 | 99 | 99 | 99 | 99 | 99 |
| 206309  | 0 | 2 | 1 | 5 | 1 | 5 | 2 | 1 | 1 | 1 | 1 | 1 | 1 | 1  | 1  | 1  | 0  | 0  | 0  |
| 2063010 | 1 | 3 | 1 | 1 | 2 | 4 | 3 | 1 | 1 | 3 | 1 | 0 | 1 | 1  | 1  | 1  | 0  | 0  | 0  |



|         |   |   |   |   |   |   |   |   |   |   |   |   |   |    |    |    |    |    |    |
|---------|---|---|---|---|---|---|---|---|---|---|---|---|---|----|----|----|----|----|----|
| 2063011 | 1 | 4 | 1 | 2 | 1 | 2 | 3 | 1 | 1 | 1 | 1 | 1 | 1 | 1  | 1  | 0  | 0  | 0  |    |
| 2063012 | 0 | 2 | 1 | 2 | 2 | 1 | 2 | 1 | 1 | 1 | 0 | 0 | 1 | 1  | 1  | 1  | 0  | 0  | 0  |
| 2063013 | 0 | 1 | 1 | 5 | 2 | 1 | 3 | 1 | 1 | 4 | 0 | 0 | 1 | 1  | 1  | 1  | 0  | 0  | 0  |
| 2063014 | 0 | 5 | 1 | 4 | 2 | 3 | 3 | 1 | 1 | 2 | 1 | 1 | 1 | 1  | 1  | 1  | 0  | 0  | 0  |
| 2063015 | 1 | 5 | 1 | 1 | 2 | 2 | 2 | 1 | 1 | 3 | 0 | 0 | 0 | 99 | 99 | 99 | 99 | 99 | 99 |
| 2063016 | 0 | 3 | 1 | 2 | 1 | 1 | 2 | 1 | 1 | 4 | 0 | 0 | 1 | 1  | 1  | 1  | 0  | 0  | 0  |
| 2063017 | 1 | 4 | 1 | 3 | 1 | 4 | 3 | 1 | 1 | 4 | 1 | 1 | 1 | 1  | 1  | 1  | 0  | 0  | 0  |
| 2063018 | 0 | 3 | 1 | 4 | 1 | 1 | 2 | 1 | 1 | 3 | 1 | 0 | 1 | 1  | 1  | 1  | 0  | 0  | 0  |
| 2063019 | 0 | 3 | 1 | 2 | 2 | 1 | 1 | 1 | 1 | 1 | 0 | 0 | 1 | 1  | 1  | 5  | 0  | 1  | 1  |
| 2063020 | 0 | 2 | 1 | 2 | 2 | 3 | 3 | 1 | 1 | 1 | 1 | 0 | 1 | 1  | 1  | 1  | 0  | 0  | 0  |
| 2063021 | 0 | 1 | 1 | 2 | 1 | 3 | 2 | 1 | 1 | 4 | 0 | 0 | 1 | 1  | 1  | 1  | 0  | 0  | 0  |
| 2063022 | 1 | 2 | 1 | 2 | 1 | 2 | 2 | 1 | 1 | 1 | 0 | 0 | 1 | 1  | 1  | 1  | 0  | 0  | 0  |
| 2063023 | 1 | 2 | 1 | 2 | 1 | 2 | 2 | 1 | 1 | 1 | 0 | 0 | 1 | 1  | 1  | 1  | 0  | 0  | 0  |
| 2063024 | 1 | 3 | 1 | 2 | 1 | 2 | 2 | 1 | 1 | 3 | 0 | 0 | 1 | 1  | 1  | 5  | 0  | 1  | 1  |
| 2063025 | 0 | 5 | 1 | 2 | 1 | 2 | 2 | 1 | 1 | 1 | 0 | 0 | 0 | 99 | 99 | 99 | 99 | 99 | 99 |
| 206311  | 0 | 1 | 1 | 2 | 1 | 1 | 2 | 1 | 4 | 4 | 0 | 0 | 1 | 1  | 1  | 1  | 0  | 0  | 0  |
| 206312  | 0 | 2 | 1 | 3 | 1 | 1 | 2 | 1 | 4 | 4 | 0 | 0 | 1 | 1  | 1  | 1  | 0  | 0  | 0  |
| 206313  | 1 | 2 | 1 | 2 | 1 | 2 | 2 | 2 | 4 | 3 | 0 | 0 | 0 | 99 | 99 | 99 | 99 | 99 | 99 |
| 206314  | 1 | 3 | 1 | 1 | 1 | 2 | 2 | 1 | 4 | 4 | 0 | 0 | 1 | 1  | 1  | 1  | 0  | 0  | 0  |
| 206315  | 0 | 2 | 1 | 2 | 1 | 1 | 2 | 1 | 4 | 2 | 1 | 0 | 1 | 1  | 1  | 1  | 0  | 0  | 0  |
| 206316  | 0 | 1 | 1 | 5 | 1 | 1 | 3 | 1 | 4 | 4 | 0 | 0 | 1 | 1  | 1  | 1  | 0  | 0  | 0  |
| 206317  | 0 | 2 | 1 | 1 | 1 | 3 | 2 | 1 | 4 | 4 | 1 | 0 | 1 | 1  | 1  | 1  | 0  | 0  | 0  |
| 206318  | 1 | 3 | 1 | 1 | 1 | 2 | 2 | 1 | 4 | 1 | 1 | 0 | 1 | 1  | 1  | 1  | 0  | 0  | 0  |
| 206319  | 0 | 5 | 1 | 1 | 1 | 1 | 1 | 1 | 4 | 1 | 0 | 0 | 0 | 99 | 99 | 99 | 99 | 99 | 99 |
| 2063110 | 1 | 2 | 1 | 2 | 1 | 2 | 2 | 1 | 4 | 3 | 1 | 0 | 1 | 1  | 1  | 1  | 0  | 0  | 0  |
| 2063111 | 0 | 3 | 1 | 1 | 1 | 3 | 2 | 1 | 4 | 4 | 0 | 0 | 1 | 1  | 1  | 1  | 0  | 0  | 0  |
| 2063112 | 0 | 2 | 1 | 1 | 1 | 1 | 2 | 1 | 4 | 3 | 0 | 0 | 1 | 1  | 1  | 1  | 0  | 0  | 0  |
| 2063113 | 1 | 2 | 1 | 2 | 1 | 2 | 2 | 1 | 4 | 2 | 0 | 0 | 1 | 1  | 1  | 1  | 0  | 0  | 0  |
| 2063114 | 1 | 3 | 1 | 2 | 1 | 2 | 2 | 1 | 4 | 2 | 1 | 0 | 1 | 1  | 1  | 1  | 0  | 0  | 0  |
| 2063115 | 0 | 3 | 1 | 2 | 1 | 1 | 2 | 1 | 4 | 4 | 0 | 0 | 0 | 99 | 99 | 99 | 99 | 99 | 99 |
| 2063116 | 1 | 2 | 1 | 2 | 1 | 2 | 2 | 1 | 4 | 3 | 1 | 0 | 1 | 1  | 1  | 1  | 0  | 0  | 0  |
| 2063117 | 0 | 3 | 1 | 3 | 2 | 1 | 2 | 1 | 4 | 4 | 0 | 0 | 1 | 1  | 1  | 1  | 0  | 0  | 0  |
| 2063118 | 1 | 3 | 1 | 2 | 1 | 3 | 2 | 1 | 4 | 3 | 0 | 0 | 1 | 1  | 4  | 1  | 1  | 0  | 1  |
| 2063119 | 0 | 2 | 1 | 2 | 1 | 1 | 2 | 1 | 4 | 3 | 0 | 0 | 1 | 1  | 1  | 1  | 0  | 0  | 0  |
| 2063120 | 1 | 1 | 1 | 2 | 1 | 2 | 2 | 1 | 4 | 1 | 0 | 0 | 1 | 1  | 1  | 1  | 0  | 0  | 0  |
| 2063121 | 1 | 2 | 1 | 2 | 1 | 2 | 2 | 1 | 4 | 4 | 0 | 0 | 1 | 1  | 1  | 1  | 0  | 0  | 0  |
| 2063122 | 1 | 4 | 1 | 1 | 1 | 2 | 2 | 1 | 4 | 3 | 0 | 0 | 1 | 1  | 1  | 1  | 0  | 0  | 0  |
| 2063123 | 0 | 2 | 1 | 1 | 1 | 1 | 2 | 1 | 4 | 3 | 0 | 0 | 1 | 1  | 1  | 1  | 0  | 0  | 0  |
| 2063124 | 0 | 1 | 1 | 1 | 1 | 1 | 3 | 1 | 4 | 1 | 0 | 0 | 1 | 1  | 1  | 1  | 0  | 0  | 0  |
| 2063125 | 1 | 2 | 1 | 2 | 1 | 2 | 3 | 2 | 4 | 4 | 0 | 0 | 1 | 1  | 1  | 1  | 0  | 0  | 0  |
| 206321  | 0 | 2 | 1 | 1 | 1 | 1 | 1 | 2 | 4 | 4 | 0 | 0 | 1 | 1  | 2  | 1  | 1  | 0  | 1  |
| 206322  | 0 | 2 | 1 | 1 | 1 | 3 | 1 | 1 | 4 | 4 | 0 | 0 | 1 | 1  | 4  | 1  | 1  | 0  | 1  |
| 206323  | 0 | 1 | 1 | 2 | 1 | 1 | 2 | 1 | 4 | 4 | 0 | 0 | 1 | 1  | 3  | 1  | 1  | 0  | 1  |
| 206324  | 1 | 4 | 1 | 2 | 1 | 2 | 1 | 1 | 4 | 4 | 0 | 0 | 1 | 1  | 2  | 1  | 1  | 0  | 1  |
| 206325  | 0 | 1 | 1 | 3 | 1 | 1 | 2 | 1 | 4 | 4 | 0 | 0 | 1 | 1  | 3  | 1  | 1  | 0  | 1  |
| 206326  | 0 | 2 | 1 | 1 | 1 | 2 | 1 | 2 | 4 | 4 | 0 | 0 | 1 | 1  | 3  | 1  | 1  | 0  | 1  |
| 206327  | 0 | 5 | 1 | 1 | 1 | 2 | 1 | 2 | 4 | 4 | 0 | 0 | 1 | 1  | 3  | 1  | 1  | 0  | 1  |
| 206328  | 0 | 3 | 1 | 1 | 1 | 1 | 1 | 2 | 4 | 4 | 0 | 0 | 1 | 1  | 3  | 2  | 1  | 0  | 1  |
| 206329  | 0 | 1 | 1 | 3 | 1 | 1 | 3 | 2 | 1 | 1 | 0 | 0 | 1 | 1  | 3  | 1  | 1  | 0  | 1  |
| 2063210 | 0 | 1 | 1 | 3 | 1 | 3 | 1 | 2 | 1 | 1 | 0 | 0 | 1 | 1  | 2  | 1  | 1  | 0  | 1  |
| 2063211 | 1 | 4 | 1 | 1 | 1 | 2 | 1 | 2 | 1 | 1 | 0 | 0 | 1 | 1  | 3  | 1  | 1  | 0  | 1  |
| 2063212 | 1 | 3 | 1 | 2 | 1 | 2 | 2 | 2 | 1 | 1 | 1 | 1 | 1 | 1  | 3  | 1  | 1  | 0  | 1  |
| 2063213 | 0 | 3 | 1 | 1 | 1 | 2 | 2 | 2 | 1 | 1 | 0 | 0 | 1 | 1  | 2  | 1  | 1  | 0  | 1  |
| 2063214 | 0 | 2 | 1 | 2 | 2 | 1 | 2 | 2 | 4 | 4 | 0 | 0 | 1 | 1  | 2  | 1  | 1  | 0  | 1  |
| 2063215 | 0 | 1 | 1 | 3 | 1 | 5 | 2 | 2 | 4 | 4 | 0 | 0 | 1 | 1  | 2  | 1  | 1  | 0  | 1  |
| 2063216 | 0 | 4 | 1 | 1 | 1 | 3 | 2 | 1 | 4 | 4 | 0 | 0 | 1 | 1  | 2  | 1  | 1  | 0  | 1  |



|         |   |   |   |   |   |   |   |   |   |   |   |   |   |    |    |    |    |    |    |
|---------|---|---|---|---|---|---|---|---|---|---|---|---|---|----|----|----|----|----|----|
| 3073413 | 0 | 1 | 3 | 2 | 4 | 1 | 1 | 2 | 4 | 3 | 0 | 0 | 1 | 1  | 1  | 1  | 0  | 0  | 0  |
| 3073414 | 1 | 5 | 3 | 3 | 4 | 2 | 2 | 2 | 4 | 3 | 0 | 0 | 0 | 99 | 99 | 99 | 99 | 99 | 99 |
| 3073415 | 1 | 4 | 3 | 2 | 4 | 2 | 1 | 2 | 4 | 3 | 0 | 0 | 1 | 1  | 1  | 1  | 0  | 0  | 0  |
| 3073416 | 1 | 2 | 3 | 3 | 4 | 2 | 1 | 1 | 4 | 3 | 0 | 0 | 1 | 1  | 1  | 1  | 0  | 0  | 0  |
| 3073417 | 1 | 2 | 3 | 3 | 4 | 2 | 1 | 2 | 4 | 3 | 0 | 0 | 1 | 1  | 1  | 1  | 0  | 0  | 0  |
| 3073418 | 1 | 4 | 3 | 2 | 4 | 2 | 1 | 1 | 4 | 3 | 0 | 0 | 0 | 99 | 99 | 99 | 99 | 99 | 99 |
| 3073419 | 1 | 2 | 3 | 3 | 4 | 2 | 1 | 2 | 4 | 3 | 0 | 0 | 1 | 1  | 1  | 1  | 0  | 0  | 0  |
| 3073420 | 1 | 2 | 3 | 2 | 4 | 2 | 1 | 2 | 4 | 3 | 0 | 0 | 1 | 1  | 1  | 1  | 0  | 0  | 0  |
| 3073421 | 1 | 3 | 3 | 2 | 4 | 2 | 2 | 1 | 4 | 3 | 0 | 0 | 1 | 1  | 1  | 1  | 0  | 0  | 0  |
| 3073422 | 1 | 3 | 3 | 2 | 4 | 2 | 2 | 2 | 4 | 3 | 0 | 0 | 1 | 1  | 1  | 1  | 0  | 0  | 0  |
| 3073423 | 1 | 4 | 3 | 4 | 4 | 5 | 2 | 2 | 4 | 3 | 0 | 0 | 1 | 1  | 1  | 4  | 0  | 1  | 1  |
| 3073424 | 1 | 2 | 3 | 5 | 4 | 5 | 3 | 2 | 4 | 3 | 1 | 1 | 1 | 1  | 1  | 1  | 0  | 0  | 0  |
| 3073425 | 1 | 3 | 3 | 2 | 4 | 2 | 1 | 2 | 4 | 3 | 0 | 0 | 1 | 1  | 1  | 1  | 0  | 0  | 0  |
| 3073426 | 1 | 4 | 3 | 2 | 4 | 2 | 1 | 1 | 4 | 3 | 0 | 0 | 1 | 1  | 1  | 1  | 0  | 0  | 0  |
| 3073427 | 1 | 4 | 3 | 2 | 4 | 2 | 1 | 2 | 4 | 3 | 0 | 0 | 1 | 1  | 1  | 1  | 0  | 0  | 0  |
| 3073428 | 1 | 1 | 3 | 5 | 4 | 5 | 3 | 2 | 4 | 3 | 1 | 1 | 1 | 1  | 1  | 1  | 0  | 0  | 0  |
| 3073429 | 1 | 2 | 3 | 4 | 4 | 2 | 2 | 1 | 4 | 3 | 0 | 0 | 1 | 1  | 1  | 1  | 0  | 0  | 0  |
| 3073430 | 1 | 4 | 3 | 4 | 4 | 2 | 1 | 1 | 4 | 3 | 0 | 0 | 0 | 99 | 99 | 99 | 99 | 99 | 99 |
| 3073431 | 1 | 4 | 3 | 2 | 4 | 2 | 1 | 1 | 4 | 3 | 0 | 0 | 1 | 1  | 1  | 1  | 0  | 0  | 0  |
| 3073432 | 1 | 2 | 3 | 5 | 4 | 5 | 2 | 2 | 4 | 3 | 1 | 1 | 1 | 1  | 1  | 1  | 0  | 0  | 0  |
| 307351  | 0 | 2 | 3 | 5 | 4 | 5 | 3 | 2 | 4 | 2 | 1 | 1 | 1 | 1  | 1  | 1  | 0  | 0  | 0  |
| 307352  | 1 | 2 | 3 | 2 | 4 | 2 | 1 | 2 | 4 | 2 | 0 | 0 | 1 | 1  | 1  | 1  | 0  | 0  | 0  |
| 307353  | 1 | 2 | 3 | 2 | 4 | 2 | 1 | 2 | 4 | 2 | 0 | 0 | 1 | 1  | 1  | 1  | 0  | 0  | 0  |
| 307354  | 0 | 4 | 3 | 2 | 4 | 1 | 1 | 2 | 4 | 2 | 0 | 0 | 1 | 1  | 1  | 1  | 0  | 0  | 0  |
| 307355  | 1 | 3 | 3 | 3 | 4 | 2 | 2 | 2 | 4 | 2 | 0 | 0 | 1 | 1  | 1  | 1  | 0  | 0  | 0  |
| 307356  | 0 | 2 | 3 | 2 | 4 | 1 | 1 | 2 | 4 | 2 | 0 | 0 | 1 | 1  | 1  | 1  | 0  | 0  | 0  |
| 307357  | 0 | 5 | 3 | 2 | 4 | 1 | 1 | 1 | 4 | 2 | 0 | 0 | 1 | 1  | 1  | 1  | 0  | 0  | 0  |
| 307358  | 0 | 4 | 3 | 2 | 4 | 1 | 1 | 1 | 4 | 2 | 0 | 0 | 1 | 1  | 1  | 1  | 0  | 0  | 0  |
| 307359  | 0 | 2 | 3 | 3 | 4 | 1 | 1 | 1 | 4 | 2 | 0 | 0 | 1 | 1  | 1  | 1  | 0  | 0  | 0  |
| 3073510 | 1 | 2 | 3 | 3 | 4 | 2 | 1 | 2 | 4 | 2 | 0 | 0 | 1 | 1  | 1  | 1  | 0  | 0  | 0  |
| 3073511 | 1 | 5 | 3 | 2 | 4 | 2 | 2 | 1 | 4 | 2 | 0 | 0 | 1 | 1  | 1  | 1  | 0  | 0  | 0  |
| 3073512 | 0 | 1 | 3 | 4 | 4 | 1 | 2 | 2 | 4 | 2 | 1 | 1 | 1 | 1  | 1  | 1  | 0  | 0  | 0  |
| 3073513 | 1 | 3 | 3 | 2 | 4 | 2 | 1 | 2 | 4 | 2 | 0 | 0 | 1 | 1  | 1  | 1  | 0  | 0  | 0  |
| 3073514 | 1 | 3 | 3 | 3 | 4 | 2 | 1 | 2 | 4 | 2 | 0 | 0 | 1 | 1  | 1  | 1  | 0  | 0  | 0  |
| 3073515 | 0 | 3 | 3 | 2 | 4 | 1 | 1 | 2 | 4 | 2 | 0 | 0 | 1 | 1  | 1  | 1  | 0  | 0  | 0  |
| 3073516 | 0 | 3 | 3 | 2 | 4 | 1 | 1 | 2 | 4 | 2 | 0 | 0 | 1 | 1  | 1  | 1  | 0  | 0  | 0  |
| 3073517 | 0 | 4 | 3 | 2 | 4 | 1 | 1 | 2 | 4 | 2 | 0 | 0 | 1 | 1  | 1  | 1  | 0  | 0  | 0  |
| 3073518 | 0 | 2 | 3 | 3 | 4 | 1 | 1 | 1 | 4 | 2 | 0 | 0 | 1 | 1  | 1  | 1  | 0  | 0  | 0  |
| 3073519 | 0 | 2 | 3 | 3 | 4 | 1 | 1 | 2 | 4 | 2 | 0 | 0 | 1 | 1  | 1  | 1  | 0  | 0  | 0  |
| 3073520 | 1 | 2 | 3 | 2 | 4 | 2 | 1 | 2 | 4 | 2 | 0 | 0 | 1 | 1  | 1  | 1  | 0  | 0  | 0  |
| 3073521 | 0 | 2 | 3 | 5 | 4 | 5 | 2 | 1 | 4 | 1 | 1 | 1 | 1 | 1  | 1  | 1  | 0  | 0  | 0  |
| 3073522 | 1 | 2 | 3 | 5 | 4 | 5 | 2 | 1 | 4 | 1 | 1 | 1 | 1 | 1  | 1  | 1  | 0  | 0  | 0  |
| 3073523 | 0 | 3 | 3 | 3 | 4 | 1 | 2 | 2 | 4 | 2 | 0 | 0 | 0 | 99 | 99 | 99 | 99 | 99 | 99 |
| 3073524 | 1 | 3 | 3 | 5 | 4 | 5 | 3 | 2 | 4 | 2 | 1 | 1 | 1 | 1  | 1  | 1  | 0  | 0  | 0  |
| 3073525 | 1 | 2 | 3 | 5 | 4 | 5 | 3 | 1 | 4 | 1 | 1 | 1 | 1 | 1  | 1  | 1  | 0  | 0  | 0  |
| 3073526 | 1 | 4 | 3 | 4 | 4 | 5 | 3 | 1 | 4 | 2 | 1 | 1 | 1 | 1  | 1  | 1  | 0  | 0  | 0  |
| 3073527 | 1 | 1 | 3 | 5 | 4 | 5 | 2 | 1 | 4 | 1 | 1 | 1 | 1 | 1  | 1  | 1  | 0  | 0  | 0  |
| 3073528 | 1 | 3 | 3 | 4 | 4 | 5 | 3 | 2 | 4 | 2 | 1 | 1 | 1 | 1  | 1  | 1  | 0  | 0  | 0  |
| 3073529 | 1 | 2 | 3 | 5 | 4 | 5 | 3 | 1 | 4 | 1 | 1 | 1 | 1 | 1  | 1  | 1  | 0  | 0  | 0  |
| 3073530 | 1 | 2 | 3 | 2 | 4 | 2 | 2 | 1 | 4 | 1 | 0 | 0 | 1 | 1  | 1  | 1  | 0  | 0  | 0  |
| 3073531 | 1 | 2 | 3 | 3 | 4 | 2 | 2 | 2 | 4 | 1 | 0 | 0 | 1 | 1  | 1  | 1  | 0  | 0  | 0  |
| 3073532 | 1 | 5 | 3 | 4 | 4 | 5 | 2 | 1 | 4 | 1 | 1 | 0 | 1 | 1  | 1  | 1  | 0  | 0  | 0  |
| 3073533 | 1 | 2 | 3 | 5 | 4 | 5 | 2 | 1 | 4 | 1 | 1 | 1 | 1 | 1  | 1  | 1  | 0  | 0  | 0  |
| 307361  | 1 | 2 | 3 | 4 | 4 | 2 | 2 | 2 | 3 | 1 | 1 | 1 | 1 | 1  | 1  | 1  | 0  | 0  | 0  |
| 307362  | 1 | 2 | 3 | 5 | 4 | 5 | 3 | 1 | 3 | 1 | 1 | 1 | 1 | 1  | 1  | 1  | 0  | 0  | 0  |
| 307363  | 1 | 5 | 3 | 5 | 4 | 5 | 2 | 1 | 3 | 1 | 1 | 1 | 1 | 1  | 3  | 1  | 1  | 0  | 1  |

|         |   |   |   |   |   |   |   |   |   |   |   |   |   |    |    |    |    |    |    |
|---------|---|---|---|---|---|---|---|---|---|---|---|---|---|----|----|----|----|----|----|
| 307364  | 1 | 5 | 3 | 2 | 4 | 2 | 2 | 1 | 3 | 1 | 0 | 0 | 1 | 1  | 1  | 1  | 0  | 0  | 0  |
| 307365  | 0 | 3 | 3 | 3 | 4 | 1 | 2 | 2 | 3 | 1 | 0 | 0 | 1 | 1  | 1  | 1  | 0  | 0  | 0  |
| 307366  | 1 | 4 | 3 | 4 | 4 | 2 | 2 | 2 | 3 | 1 | 0 | 0 | 1 | 1  | 3  | 1  | 1  | 0  | 1  |
| 307367  | 1 | 5 | 3 | 2 | 4 | 2 | 1 | 1 | 3 | 4 | 0 | 0 | 1 | 1  | 1  | 1  | 0  | 0  | 0  |
| 307368  | 1 | 4 | 3 | 5 | 2 | 5 | 3 | 2 | 3 | 1 | 1 | 1 | 1 | 1  | 1  | 2  | 0  | 0  | 0  |
| 307369  | 0 | 4 | 3 | 5 | 4 | 5 | 3 | 2 | 3 | 1 | 1 | 1 | 1 | 1  | 1  | 1  | 0  | 0  | 0  |
| 3073610 | 0 | 2 | 3 | 2 | 4 | 1 | 2 | 1 | 3 | 1 | 0 | 0 | 1 | 1  | 4  | 1  | 1  | 0  | 1  |
| 3073611 | 0 | 4 | 3 | 2 | 4 | 2 | 2 | 1 | 3 | 1 | 0 | 0 | 1 | 1  | 1  | 1  | 0  | 0  | 0  |
| 3073612 | 1 | 3 | 3 | 5 | 4 | 5 | 3 | 1 | 3 | 2 | 0 | 0 | 1 | 1  | 1  | 1  | 0  | 0  | 0  |
| 3073613 | 0 | 2 | 3 | 4 | 4 | 5 | 2 | 1 | 3 | 2 | 1 | 0 | 1 | 1  | 3  | 1  | 1  | 0  | 1  |
| 3073614 | 1 | 5 | 3 | 2 | 4 | 2 | 1 | 1 | 3 | 2 | 0 | 0 | 1 | 1  | 3  | 1  | 1  | 0  | 1  |
| 3073615 | 0 | 3 | 3 | 4 | 4 | 5 | 3 | 1 | 3 | 2 | 1 | 1 | 1 | 1  | 1  | 2  | 0  | 0  | 0  |
| 3073616 | 1 | 4 | 3 | 2 | 4 | 2 | 1 | 2 | 3 | 2 | 0 | 0 | 1 | 1  | 4  | 1  | 1  | 0  | 1  |
| 3073617 | 1 | 4 | 3 | 5 | 4 | 5 | 3 | 1 | 3 | 2 | 1 | 1 | 1 | 1  | 1  | 1  | 0  | 0  | 0  |
| 3073618 | 1 | 2 | 3 | 4 | 4 | 5 | 3 | 1 | 3 | 2 | 0 | 0 | 1 | 1  | 3  | 1  | 1  | 0  | 1  |
| 3073619 | 1 | 5 | 3 | 2 | 4 | 2 | 2 | 1 | 3 | 2 | 0 | 0 | 1 | 1  | 3  | 1  | 1  | 0  | 1  |
| 3073620 | 1 | 2 | 3 | 2 | 4 | 2 | 2 | 2 | 3 | 2 | 0 | 0 | 1 | 1  | 1  | 1  | 0  | 0  | 0  |
| 3073621 | 1 | 2 | 3 | 4 | 4 | 2 | 2 | 2 | 3 | 2 | 0 | 0 | 1 | 1  | 3  | 1  | 1  | 0  | 1  |
| 3073622 | 0 | 3 | 3 | 3 | 4 | 2 | 2 | 2 | 3 | 4 | 0 | 0 | 1 | 1  | 3  | 1  | 1  | 0  | 1  |
| 3073623 | 1 | 5 | 3 | 4 | 4 | 2 | 2 | 1 | 3 | 4 | 0 | 0 | 1 | 1  | 3  | 1  | 1  | 0  | 1  |
| 3073624 | 1 | 4 | 3 | 3 | 4 | 2 | 1 | 2 | 3 | 4 | 0 | 0 | 1 | 1  | 3  | 1  | 1  | 0  | 1  |
| 3073625 | 0 | 5 | 3 | 2 | 4 | 1 | 2 | 1 | 3 | 4 | 0 | 0 | 1 | 1  | 3  | 1  | 1  | 0  | 1  |
| 3073626 | 1 | 4 | 3 | 4 | 4 | 2 | 2 | 2 | 3 | 4 | 0 | 0 | 1 | 1  | 4  | 1  | 1  | 0  | 1  |
| 3073627 | 0 | 3 | 3 | 2 | 4 | 1 | 1 | 1 | 3 | 4 | 0 | 0 | 1 | 1  | 1  | 4  | 0  | 1  | 1  |
| 3073628 | 1 | 5 | 3 | 2 | 4 | 2 | 2 | 2 | 3 | 4 | 0 | 0 | 1 | 1  | 4  | 1  | 1  | 0  | 1  |
| 3073629 | 1 | 2 | 3 | 3 | 4 | 2 | 2 | 2 | 3 | 4 | 0 | 0 | 1 | 1  | 3  | 1  | 1  | 0  | 1  |
| 3073630 | 1 | 4 | 3 | 3 | 4 | 2 | 1 | 2 | 3 | 2 | 0 | 0 | 1 | 1  | 4  | 1  | 1  | 0  | 1  |
| 307371  | 0 | 1 | 3 | 4 | 4 | 1 | 2 | 1 | 1 | 3 | 0 | 0 | 1 | 1  | 1  | 1  | 0  | 0  | 0  |
| 307372  | 0 | 2 | 3 | 4 | 4 | 1 | 2 | 1 | 1 | 3 | 0 | 0 | 1 | 1  | 1  | 1  | 0  | 0  | 0  |
| 307373  | 0 | 2 | 3 | 2 | 4 | 1 | 2 | 2 | 1 | 2 | 0 | 0 | 1 | 1  | 1  | 1  | 0  | 0  | 0  |
| 307374  | 0 | 3 | 3 | 2 | 4 | 1 | 2 | 2 | 1 | 1 | 0 | 0 | 0 | 99 | 99 | 99 | 99 | 99 | 99 |
| 307375  | 0 | 2 | 3 | 2 | 4 | 2 | 1 | 2 | 1 | 4 | 0 | 0 | 1 | 1  | 3  | 1  | 1  | 0  | 1  |
| 307376  | 0 | 1 | 3 | 4 | 4 | 2 | 1 | 1 | 1 | 4 | 0 | 0 | 1 | 1  | 4  | 1  | 1  | 0  | 1  |
| 307377  | 1 | 2 | 3 | 2 | 4 | 2 | 2 | 2 | 1 | 1 | 1 | 1 | 1 | 1  | 1  | 1  | 0  | 0  | 0  |
| 307378  | 0 | 5 | 3 | 2 | 4 | 1 | 2 | 1 | 1 | 4 | 0 | 0 | 0 | 99 | 99 | 99 | 99 | 99 | 99 |
| 307379  | 1 | 2 | 3 | 2 | 4 | 2 | 2 | 2 | 1 | 1 | 0 | 0 | 1 | 1  | 1  | 1  | 0  | 0  | 0  |
| 3073710 | 0 | 3 | 3 | 3 | 4 | 1 | 2 | 1 | 1 | 1 | 0 | 0 | 1 | 1  | 1  | 1  | 0  | 0  | 0  |
| 3073711 | 1 | 1 | 3 | 2 | 4 | 2 | 1 | 1 | 1 | 4 | 0 | 0 | 0 | 99 | 99 | 99 | 99 | 99 | 99 |
| 3073712 | 1 | 5 | 3 | 1 | 4 | 2 | 1 | 1 | 1 | 4 | 0 | 0 | 0 | 99 | 99 | 99 | 99 | 99 | 99 |
| 3073713 | 1 | 1 | 3 | 2 | 2 | 2 | 1 | 1 | 1 | 3 | 0 | 0 | 1 | 1  | 3  | 1  | 1  | 0  | 1  |
| 3073714 | 1 | 4 | 3 | 4 | 4 | 2 | 2 | 2 | 1 | 3 | 0 | 0 | 1 | 1  | 2  | 1  | 1  | 0  | 1  |
| 3073715 | 0 | 2 | 3 | 3 | 4 | 3 | 3 | 2 | 1 | 2 | 1 | 0 | 1 | 1  | 1  | 1  | 0  | 0  | 0  |
| 3073716 | 1 | 2 | 3 | 2 | 4 | 2 | 2 | 1 | 4 | 3 | 0 | 0 | 1 | 1  | 1  | 1  | 0  | 0  | 0  |
| 3073717 | 0 | 1 | 3 | 3 | 4 | 1 | 1 | 1 | 4 | 4 | 0 | 0 | 1 | 1  | 2  | 1  | 1  | 0  | 1  |
| 3073718 | 0 | 2 | 3 | 3 | 4 | 1 | 2 | 2 | 4 | 4 | 0 | 0 | 0 | 99 | 99 | 99 | 99 | 99 | 99 |
| 3073719 | 1 | 5 | 3 | 2 | 4 | 2 | 1 | 1 | 4 | 4 | 0 | 0 | 0 | 99 | 99 | 99 | 99 | 99 | 99 |
| 3073720 | 0 | 2 | 3 | 3 | 4 | 1 | 1 | 1 | 4 | 4 | 0 | 0 | 1 | 1  | 2  | 1  | 1  | 0  | 1  |
| 3073721 | 1 | 5 | 3 | 2 | 4 | 2 | 2 | 2 | 4 | 3 | 0 | 0 | 1 | 1  | 2  | 1  | 1  | 0  | 1  |
| 3073722 | 0 | 2 | 3 | 2 | 4 | 1 | 1 | 1 | 4 | 4 | 0 | 0 | 1 | 1  | 2  | 2  | 1  | 0  | 1  |
| 3073723 | 0 | 3 | 3 | 2 | 4 | 1 | 2 | 2 | 4 | 4 | 0 | 0 | 1 | 1  | 1  | 1  | 0  | 0  | 0  |
| 3073724 | 0 | 1 | 3 | 2 | 4 | 1 | 2 | 1 | 4 | 2 | 0 | 0 | 1 | 1  | 1  | 1  | 0  | 0  | 0  |
| 3073725 | 0 | 4 | 3 | 3 | 4 | 3 | 2 | 1 | 4 | 3 | 0 | 0 | 1 | 1  | 1  | 1  | 0  | 0  | 0  |
| 3073726 | 1 | 2 | 3 | 2 | 4 | 4 | 2 | 1 | 4 | 3 | 0 | 0 | 0 | 99 | 99 | 99 | 99 | 99 | 99 |
| 3073727 | 1 | 2 | 3 | 2 | 4 | 4 | 2 | 2 | 4 | 3 | 0 | 0 | 1 | 1  | 1  | 1  | 0  | 0  | 0  |
| 3073728 | 0 | 1 | 3 | 2 | 4 | 1 | 1 | 2 | 4 | 2 | 0 | 0 | 0 | 99 | 99 | 99 | 99 | 99 | 99 |
| 3073729 | 0 | 2 | 3 | 3 | 4 | 1 | 2 | 2 | 4 | 3 | 0 | 0 | 0 | 99 | 99 | 99 | 99 | 99 | 99 |

|         |   |   |   |   |   |   |   |   |   |   |   |   |   |    |    |    |    |    |    |
|---------|---|---|---|---|---|---|---|---|---|---|---|---|---|----|----|----|----|----|----|
| 3073730 | 0 | 1 | 3 | 2 | 3 | 1 | 1 | 1 | 4 | 2 | 0 | 0 | 0 | 99 | 99 | 99 | 99 | 99 | 99 |
| 307381  | 0 | 2 | 3 | 2 | 4 | 2 | 2 | 1 | 4 | 1 | 0 | 0 | 1 | 1  | 1  | 4  | 0  | 1  | 1  |
| 307382  | 1 | 4 | 3 | 3 | 4 | 2 | 2 | 2 | 4 | 1 | 0 | 0 | 1 | 1  | 1  | 4  | 0  | 1  | 1  |
| 307383  | 0 | 2 | 3 | 3 | 4 | 2 | 2 | 2 | 4 | 1 | 0 | 0 | 1 | 1  | 1  | 4  | 0  | 1  | 1  |
| 307384  | 1 | 3 | 3 | 2 | 4 | 2 | 2 | 2 | 4 | 1 | 0 | 0 | 1 | 1  | 1  | 4  | 0  | 1  | 1  |
| 307385  | 0 | 1 | 3 | 4 | 4 | 2 | 2 | 2 | 4 | 1 | 0 | 0 | 1 | 1  | 1  | 1  | 0  | 0  | 0  |
| 307386  | 1 | 3 | 3 | 2 | 4 | 2 | 2 | 2 | 4 | 1 | 0 | 0 | 1 | 1  | 1  | 4  | 0  | 1  | 1  |
| 307387  | 0 | 1 | 3 | 3 | 4 | 2 | 2 | 2 | 4 | 1 | 0 | 0 | 1 | 1  | 1  | 4  | 0  | 1  | 1  |
| 307388  | 1 | 3 | 3 | 3 | 4 | 2 | 2 | 1 | 4 | 1 | 0 | 0 | 1 | 1  | 3  | 1  | 1  | 0  | 1  |
| 307389  | 1 | 3 | 3 | 4 | 4 | 2 | 2 | 1 | 4 | 1 | 0 | 0 | 1 | 1  | 3  | 1  | 1  | 0  | 1  |
| 3073810 | 0 | 2 | 3 | 4 | 4 | 3 | 2 | 1 | 4 | 1 | 1 | 0 | 1 | 1  | 1  | 1  | 0  | 0  | 0  |
| 3073811 | 0 | 2 | 3 | 5 | 4 | 5 | 2 | 2 | 4 | 1 | 1 | 0 | 1 | 1  | 1  | 1  | 0  | 0  | 0  |
| 3073812 | 1 | 2 | 3 | 3 | 4 | 2 | 2 | 2 | 4 | 1 | 0 | 0 | 1 | 1  | 1  | 1  | 0  | 0  | 0  |
| 3073813 | 0 | 3 | 3 | 2 | 4 | 2 | 2 | 1 | 4 | 1 | 0 | 0 | 1 | 1  | 1  | 4  | 0  | 1  | 1  |
| 3073814 | 1 | 2 | 3 | 5 | 4 | 5 | 2 | 2 | 4 | 1 | 0 | 0 | 1 | 1  | 3  | 1  | 1  | 0  | 1  |
| 3073815 | 0 | 2 | 3 | 5 | 4 | 5 | 3 | 1 | 4 | 1 | 1 | 0 | 1 | 1  | 3  | 1  | 1  | 0  | 1  |
| 3073816 | 1 | 2 | 3 | 2 | 4 | 2 | 1 | 2 | 4 | 3 | 0 | 0 | 1 | 1  | 1  | 1  | 0  | 0  | 0  |
| 3073817 | 0 | 2 | 3 | 5 | 4 | 5 | 3 | 1 | 4 | 1 | 1 | 0 | 1 | 1  | 1  | 1  | 0  | 0  | 0  |
| 3073818 | 1 | 4 | 3 | 3 | 4 | 2 | 2 | 2 | 4 | 2 | 0 | 0 | 1 | 1  | 1  | 1  | 0  | 0  | 0  |
| 3073819 | 0 | 1 | 3 | 4 | 4 | 3 | 3 | 1 | 4 | 1 | 1 | 0 | 1 | 1  | 1  | 1  | 0  | 0  | 0  |
| 3073820 | 1 | 3 | 3 | 4 | 4 | 2 | 2 | 2 | 4 | 2 | 0 | 0 | 1 | 1  | 3  | 1  | 1  | 0  | 1  |
| 3073821 | 0 | 2 | 3 | 5 | 4 | 5 | 2 | 1 | 4 | 4 | 0 | 0 | 1 | 1  | 1  | 1  | 0  | 0  | 0  |
| 3073822 | 1 | 4 | 3 | 2 | 4 | 2 | 2 | 2 | 4 | 3 | 0 | 0 | 1 | 1  | 1  | 1  | 0  | 0  | 0  |
| 3073823 | 0 | 2 | 3 | 3 | 4 | 2 | 2 | 2 | 4 | 2 | 0 | 0 | 1 | 1  | 1  | 1  | 0  | 0  | 0  |
| 3073824 | 1 | 4 | 3 | 2 | 4 | 2 | 2 | 2 | 4 | 3 | 0 | 0 | 1 | 1  | 1  | 1  | 0  | 0  | 0  |
| 3073825 | 0 | 1 | 3 | 4 | 4 | 2 | 2 | 1 | 4 | 3 | 0 | 0 | 1 | 1  | 1  | 1  | 0  | 0  | 0  |
| 3073826 | 0 | 4 | 3 | 2 | 4 | 1 | 2 | 1 | 4 | 3 | 0 | 0 | 1 | 1  | 1  | 1  | 0  | 0  | 0  |
| 3073827 | 1 | 4 | 3 | 2 | 2 | 2 | 2 | 2 | 4 | 3 | 0 | 0 | 1 | 1  | 1  | 1  | 0  | 0  | 0  |
| 3073828 | 1 | 4 | 3 | 4 | 4 | 5 | 3 | 2 | 4 | 2 | 1 | 1 | 1 | 1  | 1  | 1  | 0  | 0  | 0  |
| 3073829 | 0 | 2 | 3 | 2 | 4 | 2 | 2 | 2 | 4 | 4 | 0 | 0 | 1 | 1  | 1  | 4  | 0  | 1  | 1  |
| 3073830 | 1 | 4 | 3 | 2 | 4 | 2 | 2 | 2 | 4 | 3 | 0 | 0 | 1 | 1  | 1  | 1  | 0  | 0  | 0  |
| 307391  | 1 | 3 | 3 | 4 | 4 | 5 | 2 | 2 | 1 | 3 | 1 | 1 | 1 | 1  | 1  | 1  | 0  | 0  | 0  |
| 307392  | 1 | 1 | 3 | 4 | 4 | 2 | 2 | 2 | 2 | 3 | 0 | 0 | 1 | 1  | 1  | 6  | 0  | 1  | 1  |
| 307393  | 1 | 2 | 3 | 2 | 4 | 2 | 2 | 2 | 2 | 3 | 0 | 0 | 1 | 1  | 2  | 1  | 1  | 0  | 1  |
| 307394  | 0 | 2 | 3 | 2 | 4 | 1 | 2 | 2 | 2 | 3 | 0 | 0 | 0 | 99 | 99 | 99 | 99 | 99 | 99 |
| 307395  | 1 | 1 | 3 | 4 | 4 | 2 | 2 | 1 | 2 | 3 | 0 | 0 | 0 | 99 | 99 | 99 | 99 | 99 | 99 |
| 307396  | 0 | 2 | 3 | 2 | 4 | 1 | 2 | 2 | 3 | 2 | 0 | 0 | 0 | 99 | 99 | 99 | 99 | 99 | 99 |
| 307397  | 1 | 3 | 3 | 2 | 4 | 2 | 2 | 2 | 3 | 2 | 0 | 0 | 0 | 99 | 99 | 99 | 99 | 99 | 99 |
| 307398  | 1 | 4 | 3 | 3 | 4 | 2 | 2 | 1 | 2 | 3 | 0 | 0 | 0 | 99 | 99 | 99 | 99 | 99 | 99 |
| 307399  | 0 | 4 | 3 | 3 | 4 | 1 | 1 | 1 | 2 | 2 | 0 | 0 | 1 | 1  | 4  | 1  | 1  | 0  | 1  |
| 3073910 | 1 | 4 | 3 | 2 | 4 | 2 | 2 | 2 | 2 | 2 | 0 | 0 | 1 | 1  | 1  | 1  | 0  | 0  | 0  |
| 3073911 | 1 | 5 | 3 | 3 | 4 | 2 | 1 | 1 | 2 | 2 | 0 | 0 | 1 | 1  | 1  | 1  | 0  | 0  | 0  |
| 3073912 | 0 | 1 | 3 | 5 | 4 | 5 | 2 | 1 | 2 | 1 | 0 | 0 | 1 | 1  | 1  | 1  | 0  | 0  | 0  |
| 3073913 | 1 | 3 | 3 | 5 | 4 | 5 | 2 | 1 | 2 | 1 | 1 | 0 | 1 | 1  | 1  | 1  | 0  | 0  | 0  |
| 3073914 | 0 | 2 | 3 | 2 | 4 | 1 | 1 | 2 | 2 | 2 | 0 | 0 | 0 | 99 | 99 | 99 | 99 | 99 | 99 |
| 3073915 | 0 | 1 | 3 | 3 | 4 | 1 | 2 | 1 | 2 | 1 | 0 | 0 | 0 | 99 | 99 | 99 | 99 | 99 | 99 |
| 3073916 | 0 | 2 | 3 | 2 | 4 | 2 | 1 | 2 | 2 | 2 | 0 | 0 | 0 | 99 | 99 | 99 | 99 | 99 | 99 |
| 3073917 | 0 | 2 | 3 | 2 | 4 | 1 | 1 | 2 | 2 | 1 | 0 | 0 | 0 | 99 | 99 | 99 | 99 | 99 | 99 |
| 3073918 | 1 | 4 | 3 | 2 | 4 | 2 | 1 | 1 | 2 | 2 | 0 | 0 | 0 | 99 | 99 | 99 | 99 | 99 | 99 |
| 3073919 | 1 | 4 | 3 | 2 | 4 | 2 | 1 | 2 | 2 | 1 | 0 | 0 | 0 | 99 | 99 | 99 | 99 | 99 | 99 |
| 3073920 | 0 | 2 | 3 | 2 | 4 | 1 | 2 | 1 | 2 | 2 | 0 | 0 | 0 | 99 | 99 | 99 | 99 | 99 | 99 |
| 3073921 | 1 | 2 | 3 | 2 | 4 | 2 | 1 | 1 | 2 | 2 | 0 | 0 | 1 | 1  | 3  | 1  | 1  | 0  | 1  |
| 3073922 | 1 | 5 | 3 | 2 | 4 | 2 | 1 | 2 | 2 | 2 | 0 | 0 | 1 | 1  | 2  | 1  | 1  | 0  | 1  |
| 3073923 | 1 | 2 | 3 | 2 | 4 | 2 | 1 | 1 | 2 | 2 | 0 | 0 | 0 | 99 | 99 | 99 | 99 | 99 | 99 |
| 3073924 | 0 | 2 | 3 | 2 | 4 | 1 | 2 | 2 | 2 | 2 | 0 | 0 | 0 | 99 | 99 | 99 | 99 | 99 | 99 |
| 3073925 | 1 | 5 | 3 | 2 | 4 | 2 | 1 | 1 | 2 | 2 | 0 | 0 | 0 | 99 | 99 | 99 | 99 | 99 | 99 |

|         |   |   |   |   |   |   |   |   |   |   |   |   |   |    |    |    |    |    |    |
|---------|---|---|---|---|---|---|---|---|---|---|---|---|---|----|----|----|----|----|----|
| 3073926 | 0 | 2 | 3 | 2 | 4 | 1 | 1 | 1 | 2 | 2 | 0 | 0 | 1 | 1  | 2  | 1  | 1  | 0  | 1  |
| 3073927 | 0 | 2 | 3 | 2 | 4 | 1 | 2 | 2 | 2 | 2 | 0 | 0 | 1 | 1  | 2  | 6  | 1  | 1  | 1  |
| 3073928 | 0 | 3 | 3 | 2 | 4 | 1 | 2 | 1 | 4 | 2 | 0 | 0 | 0 | 99 | 99 | 99 | 99 | 99 | 99 |
| 3073929 | 0 | 3 | 3 | 2 | 4 | 2 | 1 | 1 | 2 | 2 | 0 | 0 | 0 | 99 | 99 | 99 | 99 | 99 | 99 |
| 3073930 | 1 | 2 | 3 | 4 | 4 | 5 | 2 | 2 | 2 | 3 | 0 | 0 | 0 | 99 | 99 | 99 | 99 | 99 | 99 |
| 307401  | 0 | 3 | 3 | 3 | 4 | 2 | 2 | 1 | 2 | 4 | 0 | 0 | 1 | 1  | 3  | 1  | 1  | 0  | 1  |
| 307402  | 1 | 3 | 3 | 2 | 4 | 2 | 1 | 1 | 2 | 4 | 0 | 0 | 1 | 1  | 3  | 1  | 1  | 0  | 1  |
| 307403  | 0 | 2 | 3 | 2 | 4 | 2 | 1 | 2 | 2 | 4 | 0 | 0 | 1 | 1  | 1  | 4  | 0  | 1  | 1  |
| 307404  | 1 | 3 | 3 | 3 | 4 | 2 | 2 | 2 | 2 | 4 | 0 | 0 | 1 | 1  | 1  | 4  | 0  | 1  | 1  |
| 307405  | 1 | 3 | 3 | 2 | 4 | 2 | 2 | 2 | 2 | 4 | 0 | 0 | 1 | 1  | 1  | 4  | 0  | 1  | 1  |
| 307406  | 1 | 3 | 3 | 3 | 4 | 2 | 2 | 2 | 2 | 4 | 0 | 0 | 1 | 1  | 1  | 4  | 0  | 1  | 1  |
| 307407  | 0 | 2 | 3 | 2 | 4 | 2 | 2 | 2 | 2 | 4 | 0 | 0 | 1 | 1  | 3  | 1  | 1  | 0  | 1  |
| 307408  | 0 | 1 | 3 | 4 | 4 | 2 | 2 | 2 | 2 | 4 | 0 | 0 | 1 | 1  | 3  | 1  | 1  | 0  | 1  |
| 307409  | 0 | 3 | 3 | 3 | 4 | 2 | 2 | 2 | 2 | 4 | 0 | 0 | 1 | 1  | 1  | 4  | 0  | 1  | 1  |
| 3074010 | 1 | 1 | 3 | 5 | 4 | 5 | 2 | 1 | 2 | 4 | 0 | 0 | 1 | 1  | 1  | 1  | 0  | 0  | 0  |
| 3074011 | 1 | 3 | 3 | 2 | 4 | 2 | 1 | 1 | 2 | 1 | 0 | 0 | 1 | 1  | 3  | 1  | 1  | 0  | 1  |
| 3074012 | 1 | 2 | 3 | 5 | 4 | 5 | 3 | 1 | 2 | 1 | 1 | 0 | 1 | 1  | 3  | 1  | 1  | 0  | 1  |
| 3074013 | 0 | 1 | 3 | 4 | 4 | 2 | 2 | 1 | 2 | 1 | 0 | 0 | 1 | 1  | 3  | 1  | 1  | 0  | 1  |
| 3074014 | 0 | 2 | 3 | 3 | 4 | 2 | 2 | 2 | 2 | 1 | 0 | 0 | 1 | 1  | 1  | 4  | 0  | 1  | 1  |
| 3074015 | 0 | 2 | 3 | 4 | 4 | 2 | 2 | 1 | 2 | 1 | 0 | 0 | 1 | 1  | 1  | 4  | 0  | 1  | 1  |
| 3074016 | 1 | 2 | 3 | 5 | 4 | 5 | 3 | 2 | 2 | 1 | 1 | 1 | 1 | 1  | 1  | 1  | 0  | 0  | 0  |
| 3074017 | 0 | 2 | 3 | 2 | 4 | 2 | 1 | 2 | 2 | 1 | 0 | 0 | 1 | 1  | 1  | 4  | 0  | 1  | 1  |
| 3074018 | 1 | 2 | 3 | 2 | 4 | 2 | 1 | 1 | 2 | 3 | 0 | 0 | 1 | 1  | 1  | 4  | 0  | 1  | 1  |
| 3074019 | 1 | 1 | 3 | 3 | 4 | 2 | 1 | 2 | 2 | 3 | 0 | 0 | 1 | 1  | 1  | 1  | 0  | 0  | 0  |
| 3074020 | 1 | 1 | 3 | 2 | 4 | 2 | 1 | 1 | 2 | 1 | 0 | 0 | 1 | 1  | 1  | 4  | 0  | 1  | 1  |
| 3074021 | 0 | 2 | 3 | 3 | 4 | 2 | 2 | 2 | 2 | 4 | 1 | 0 | 1 | 1  | 1  | 4  | 0  | 1  | 1  |
| 3074022 | 0 | 2 | 3 | 2 | 4 | 2 | 1 | 2 | 2 | 3 | 0 | 0 | 1 | 1  | 1  | 1  | 0  | 0  | 0  |
| 3074023 | 0 | 2 | 3 | 3 | 4 | 2 | 2 | 2 | 2 | 3 | 0 | 0 | 1 | 1  | 1  | 1  | 0  | 0  | 0  |
| 3074024 | 1 | 5 | 3 | 2 | 4 | 2 | 2 | 2 | 2 | 3 | 0 | 0 | 1 | 1  | 1  | 1  | 0  | 0  | 0  |
| 3074025 | 0 | 3 | 3 | 2 | 4 | 2 | 1 | 2 | 2 | 3 | 0 | 0 | 1 | 1  | 1  | 1  | 0  | 0  | 0  |
| 3074026 | 0 | 2 | 3 | 4 | 4 | 2 | 2 | 1 | 2 | 3 | 0 | 0 | 1 | 1  | 3  | 1  | 1  | 0  | 1  |
| 3074027 | 1 | 1 | 3 | 3 | 4 | 2 | 2 | 1 | 2 | 3 | 0 | 0 | 1 | 1  | 1  | 1  | 0  | 0  | 0  |
| 3074028 | 0 | 3 | 3 | 2 | 4 | 2 | 2 | 2 | 2 | 3 | 0 | 0 | 1 | 1  | 1  | 4  | 0  | 1  | 1  |
| 3074029 | 1 | 2 | 3 | 3 | 4 | 2 | 2 | 2 | 2 | 3 | 0 | 0 | 1 | 1  | 1  | 4  | 0  | 1  | 1  |
| 3074030 | 1 | 3 | 3 | 3 | 4 | 2 | 1 | 1 | 2 | 1 | 0 | 0 | 1 | 1  | 1  | 4  | 0  | 1  | 1  |
| 3074031 | 1 | 2 | 3 | 2 | 4 | 2 | 2 | 2 | 2 | 2 | 0 | 0 | 1 | 1  | 1  | 1  | 0  | 0  | 0  |
| 3074032 | 0 | 1 | 3 | 4 | 4 | 2 | 2 | 1 | 2 | 1 | 0 | 0 | 1 | 1  | 1  | 1  | 0  | 0  | 0  |
| 3074033 | 0 | 1 | 3 | 5 | 4 | 5 | 2 | 1 | 2 | 1 | 0 | 0 | 1 | 1  | 1  | 1  | 0  | 0  | 0  |
| 3074034 | 1 | 4 | 3 | 4 | 4 | 2 | 1 | 1 | 2 | 1 | 0 | 0 | 1 | 1  | 3  | 1  | 1  | 0  | 1  |
| 3074035 | 0 | 2 | 3 | 5 | 4 | 5 | 2 | 1 | 2 | 1 | 1 | 0 | 1 | 1  | 3  | 1  | 1  | 0  | 1  |
| 307411  | 0 | 2 | 3 | 2 | 2 | 1 | 2 | 2 | 3 | 2 | 0 | 0 | 1 | 1  | 1  | 1  | 0  | 0  | 0  |
| 307412  | 0 | 4 | 3 | 2 | 4 | 1 | 2 | 1 | 3 | 2 | 0 | 0 | 1 | 1  | 1  | 1  | 0  | 0  | 0  |
| 307413  | 0 | 3 | 3 | 2 | 4 | 1 | 2 | 2 | 3 | 3 | 0 | 0 | 1 | 1  | 1  | 1  | 0  | 0  | 0  |
| 307414  | 0 | 1 | 3 | 4 | 4 | 1 | 1 | 2 | 3 | 3 | 0 | 0 | 1 | 1  | 1  | 1  | 0  | 0  | 0  |
| 307415  | 0 | 2 | 3 | 2 | 4 | 1 | 2 | 2 | 2 | 2 | 0 | 0 | 1 | 1  | 1  | 1  | 0  | 0  | 0  |
| 307416  | 1 | 3 | 3 | 2 | 4 | 2 | 2 | 2 | 2 | 2 | 0 | 0 | 1 | 1  | 2  | 1  | 1  | 0  | 1  |
| 307417  | 0 | 1 | 3 | 2 | 4 | 1 | 2 | 2 | 3 | 2 | 0 | 0 | 1 | 1  | 1  | 1  | 0  | 0  | 0  |
| 307418  | 0 | 2 | 3 | 4 | 4 | 3 | 2 | 1 | 3 | 3 | 0 | 0 | 1 | 1  | 2  | 1  | 1  | 0  | 1  |
| 307419  | 0 | 2 | 3 | 5 | 2 | 5 | 2 | 2 | 3 | 3 | 0 | 0 | 1 | 1  | 2  | 1  | 1  | 0  | 1  |
| 3074110 | 0 | 2 | 3 | 2 | 4 | 1 | 2 | 2 | 3 | 2 | 0 | 0 | 1 | 1  | 2  | 1  | 1  | 0  | 1  |
| 3074111 | 1 | 1 | 3 | 3 | 4 | 2 | 2 | 2 | 3 | 2 | 0 | 0 | 1 | 1  | 2  | 1  | 1  | 0  | 1  |
| 3074112 | 0 | 2 | 3 | 4 | 4 | 1 | 1 | 2 | 3 | 2 | 0 | 0 | 1 | 1  | 2  | 1  | 1  | 0  | 1  |
| 3074113 | 0 | 2 | 3 | 2 | 4 | 1 | 2 | 2 | 3 | 2 | 0 | 0 | 1 | 1  | 1  | 1  | 0  | 0  | 0  |
| 3074114 | 1 | 2 | 3 | 3 | 4 | 2 | 2 | 1 | 3 | 2 | 0 | 0 | 1 | 1  | 1  | 1  | 0  | 0  | 0  |
| 3074115 | 1 | 3 | 3 | 3 | 4 | 4 | 2 | 1 | 3 | 2 | 0 | 0 | 1 | 1  | 1  | 1  | 0  | 0  | 0  |
| 3074116 | 1 | 3 | 3 | 2 | 4 | 3 | 3 | 2 | 3 | 2 | 0 | 0 | 1 | 1  | 1  | 1  | 0  | 0  | 0  |

|         |   |   |   |   |   |   |   |   |   |   |   |   |   |    |    |    |    |    |    |
|---------|---|---|---|---|---|---|---|---|---|---|---|---|---|----|----|----|----|----|----|
| 3074117 | 1 | 3 | 3 | 2 | 4 | 2 | 2 | 2 | 3 | 2 | 0 | 0 | 1 | 1  | 1  | 1  | 0  | 0  | 0  |
| 3074118 | 0 | 3 | 3 | 3 | 4 | 1 | 2 | 2 | 3 | 2 | 0 | 0 | 1 | 1  | 1  | 1  | 0  | 0  | 0  |
| 3074119 | 0 | 4 | 3 | 5 | 4 | 5 | 2 | 1 | 3 | 2 | 0 | 0 | 1 | 1  | 1  | 1  | 0  | 0  | 0  |
| 3074120 | 1 | 5 | 3 | 5 | 4 | 5 | 3 | 2 | 3 | 1 | 1 | 1 | 1 | 1  | 1  | 1  | 0  | 0  | 0  |
| 3074121 | 1 | 4 | 3 | 3 | 4 | 2 | 2 | 1 | 3 | 3 | 0 | 0 | 1 | 1  | 1  | 1  | 0  | 0  | 0  |
| 3074122 | 1 | 3 | 3 | 3 | 4 | 5 | 2 | 1 | 3 | 1 | 0 | 0 | 1 | 1  | 1  | 1  | 0  | 0  | 0  |
| 3074123 | 0 | 4 | 3 | 3 | 4 | 1 | 2 | 1 | 3 | 1 | 0 | 0 | 1 | 1  | 1  | 1  | 0  | 0  | 0  |
| 3074124 | 0 | 5 | 3 | 2 | 4 | 1 | 1 | 1 | 3 | 1 | 0 | 0 | 1 | 1  | 1  | 1  | 0  | 0  | 0  |
| 3074125 | 1 | 5 | 3 | 2 | 4 | 2 | 2 | 2 | 3 | 1 | 0 | 0 | 1 | 1  | 1  | 1  | 0  | 0  | 0  |
| 3074126 | 0 | 2 | 3 | 5 | 4 | 5 | 2 | 1 | 3 | 1 | 0 | 0 | 1 | 1  | 1  | 1  | 0  | 0  | 0  |
| 3074127 | 0 | 5 | 3 | 2 | 4 | 1 | 2 | 2 | 3 | 1 | 0 | 0 | 1 | 1  | 1  | 1  | 0  | 0  | 0  |
| 3074128 | 0 | 5 | 3 | 2 | 4 | 1 | 2 | 2 | 3 | 3 | 0 | 0 | 1 | 1  | 1  | 1  | 0  | 0  | 0  |
| 3074129 | 1 | 4 | 3 | 5 | 4 | 5 | 2 | 2 | 3 | 3 | 1 | 0 | 1 | 1  | 4  | 1  | 1  | 0  | 1  |
| 3074130 | 0 | 2 | 3 | 3 | 4 | 1 | 3 | 2 | 3 | 2 | 1 | 0 | 1 | 1  | 1  | 1  | 0  | 0  | 0  |
| 3074131 | 1 | 5 | 3 | 2 | 4 | 2 | 2 | 2 | 3 | 2 | 0 | 0 | 1 | 1  | 2  | 1  | 1  | 0  | 1  |
| 3074132 | 0 | 2 | 3 | 2 | 4 | 1 | 2 | 2 | 4 | 4 | 0 | 0 | 0 | 99 | 99 | 99 | 99 | 99 | 99 |
| 3074133 | 1 | 4 | 3 | 2 | 4 | 2 | 2 | 1 | 4 | 4 | 0 | 0 | 0 | 99 | 99 | 99 | 99 | 99 | 99 |
| 3074134 | 0 | 2 | 3 | 5 | 4 | 5 | 3 | 1 | 4 | 3 | 1 | 1 | 1 | 1  | 1  | 1  | 0  | 0  | 0  |
| 3074135 | 1 | 5 | 3 | 2 | 4 | 2 | 2 | 1 | 4 | 3 | 0 | 0 | 1 | 1  | 2  | 1  | 1  | 0  | 1  |
| 3074136 | 1 | 5 | 3 | 2 | 4 | 2 | 2 | 1 | 4 | 4 | 0 | 0 | 1 | 1  | 1  | 1  | 0  | 0  | 0  |
| 3074137 | 1 | 5 | 3 | 2 | 4 | 2 | 2 | 2 | 4 | 3 | 0 | 0 | 0 | 99 | 99 | 99 | 99 | 99 | 99 |
| 3074138 | 0 | 3 | 3 | 3 | 4 | 1 | 2 | 1 | 4 | 4 | 0 | 0 | 1 | 1  | 2  | 1  | 1  | 0  | 1  |
| 3074139 | 1 | 3 | 3 | 2 | 4 | 4 | 2 | 1 | 4 | 3 | 0 | 0 | 0 | 99 | 99 | 99 | 99 | 99 | 99 |
| 3074140 | 1 | 5 | 3 | 2 | 4 | 2 | 2 | 2 | 4 | 4 | 0 | 0 | 0 | 99 | 99 | 99 | 99 | 99 | 99 |
| 308421  | 0 | 4 | 3 | 2 | 4 | 2 | 1 | 1 | 4 | 4 | 0 | 0 | 0 | 99 | 99 | 99 | 99 | 99 | 99 |
| 308422  | 1 | 4 | 3 | 2 | 4 | 2 | 2 | 2 | 4 | 4 | 0 | 0 | 1 | 1  | 4  | 1  | 1  | 0  | 1  |
| 308423  | 0 | 3 | 3 | 3 | 4 | 2 | 3 | 2 | 2 | 4 | 0 | 0 | 1 | 1  | 4  | 1  | 1  | 0  | 1  |
| 308424  | 0 | 2 | 3 | 2 | 4 | 2 | 1 | 1 | 2 | 4 | 0 | 0 | 1 | 1  | 4  | 1  | 1  | 0  | 1  |
| 308425  | 0 | 3 | 3 | 2 | 4 | 2 | 3 | 2 | 2 | 4 | 0 | 0 | 1 | 1  | 1  | 1  | 0  | 0  | 0  |
| 308426  | 0 | 2 | 3 | 2 | 4 | 2 | 3 | 2 | 2 | 4 | 0 | 0 | 1 | 1  | 1  | 1  | 0  | 0  | 0  |
| 308427  | 1 | 2 | 3 | 2 | 4 | 2 | 1 | 2 | 4 | 4 | 0 | 0 | 0 | 99 | 99 | 99 | 99 | 99 | 99 |
| 308428  | 1 | 4 | 3 | 2 | 4 | 2 | 2 | 2 | 4 | 4 | 0 | 0 | 1 | 1  | 2  | 1  | 1  | 0  | 1  |
| 308429  | 0 | 1 | 3 | 4 | 4 | 2 | 2 | 2 | 4 | 4 | 0 | 0 | 1 | 1  | 3  | 1  | 1  | 0  | 1  |
| 3084210 | 0 | 2 | 3 | 2 | 4 | 2 | 2 | 1 | 2 | 4 | 0 | 0 | 0 | 99 | 99 | 99 | 99 | 99 | 99 |
| 3084211 | 1 | 3 | 3 | 2 | 4 | 2 | 1 | 2 | 2 | 3 | 0 | 0 | 0 | 99 | 99 | 99 | 99 | 99 | 99 |
| 3084212 | 0 | 3 | 3 | 1 | 4 | 2 | 2 | 1 | 2 | 1 | 0 | 0 | 0 | 99 | 99 | 99 | 99 | 99 | 99 |
| 3084213 | 0 | 2 | 3 | 2 | 4 | 2 | 2 | 2 | 4 | 4 | 0 | 0 | 0 | 99 | 99 | 99 | 99 | 99 | 99 |
| 3084214 | 0 | 2 | 3 | 2 | 4 | 2 | 2 | 1 | 4 | 4 | 0 | 0 | 0 | 99 | 99 | 99 | 99 | 99 | 99 |
| 3084215 | 1 | 2 | 3 | 2 | 4 | 2 | 1 | 1 | 2 | 4 | 0 | 0 | 0 | 99 | 99 | 99 | 99 | 99 | 99 |
| 3084216 | 1 | 3 | 3 | 2 | 4 | 2 | 2 | 2 | 2 | 4 | 0 | 0 | 0 | 99 | 99 | 99 | 99 | 99 | 99 |
| 3084217 | 1 | 2 | 3 | 2 | 4 | 2 | 2 | 1 | 2 | 1 | 0 | 0 | 0 | 99 | 99 | 99 | 99 | 99 | 99 |
| 3084218 | 1 | 2 | 3 | 2 | 4 | 2 | 2 | 1 | 4 | 1 | 0 | 0 | 1 | 1  | 3  | 1  | 1  | 0  | 1  |
| 3084219 | 1 | 3 | 3 | 3 | 4 | 2 | 2 | 1 | 4 | 1 | 0 | 0 | 1 | 1  | 1  | 1  | 0  | 0  | 0  |
| 3084220 | 1 | 4 | 3 | 4 | 4 | 5 | 3 | 2 | 4 | 1 | 1 | 1 | 0 | 99 | 99 | 99 | 99 | 99 | 99 |
| 3084221 | 0 | 2 | 3 | 2 | 4 | 3 | 2 | 2 | 4 | 1 | 1 | 1 | 1 | 1  | 1  | 1  | 0  | 0  | 0  |
| 3084222 | 0 | 4 | 3 | 3 | 4 | 1 | 2 | 2 | 4 | 1 | 0 | 0 | 0 | 99 | 99 | 99 | 99 | 99 | 99 |
| 3084223 | 0 | 4 | 3 | 2 | 4 | 1 | 1 | 1 | 4 | 1 | 0 | 0 | 1 | 1  | 1  | 1  | 0  | 0  | 0  |
| 3084224 | 0 | 2 | 3 | 3 | 4 | 1 | 2 | 2 | 4 | 1 | 0 | 0 | 0 | 99 | 99 | 99 | 99 | 99 | 99 |
| 3084225 | 1 | 3 | 3 | 2 | 4 | 2 | 2 | 2 | 4 | 2 | 0 | 0 | 0 | 99 | 99 | 99 | 99 | 99 | 99 |
| 3084226 | 0 | 2 | 3 | 4 | 4 | 1 | 3 | 2 | 4 | 3 | 0 | 0 | 1 | 1  | 1  | 1  | 0  | 0  | 0  |
| 3084227 | 1 | 4 | 3 | 2 | 4 | 2 | 2 | 2 | 4 | 3 | 0 | 0 | 0 | 99 | 99 | 99 | 99 | 99 | 99 |
| 3084228 | 1 | 5 | 3 | 1 | 4 | 2 | 2 | 1 | 4 | 2 | 0 | 0 | 0 | 99 | 99 | 99 | 99 | 99 | 99 |
| 3084229 | 0 | 1 | 3 | 3 | 4 | 1 | 3 | 2 | 4 | 2 | 0 | 0 | 1 | 1  | 1  | 1  | 0  | 0  | 0  |
| 3084230 | 1 | 4 | 3 | 2 | 4 | 5 | 2 | 2 | 4 | 1 | 1 | 1 | 0 | 99 | 99 | 99 | 99 | 99 | 99 |
| 308431  | 0 | 3 | 3 | 2 | 4 | 1 | 2 | 2 | 2 | 4 | 0 | 0 | 1 | 1  | 1  | 1  | 0  | 0  | 0  |
| 308432  | 1 | 5 | 3 | 4 | 4 | 5 | 2 | 1 | 2 | 4 | 0 | 0 | 1 | 1  | 2  | 1  | 1  | 0  | 1  |

|         |   |   |   |   |   |   |   |   |   |   |   |   |   |    |    |    |    |    |    |
|---------|---|---|---|---|---|---|---|---|---|---|---|---|---|----|----|----|----|----|----|
| 308433  | 0 | 2 | 3 | 2 | 4 | 2 | 1 | 1 | 2 | 4 | 0 | 0 | 1 | 1  | 2  | 1  | 1  | 0  | 1  |
| 308434  | 0 | 4 | 3 | 2 | 4 | 2 | 2 | 1 | 2 | 4 | 0 | 0 | 0 | 99 | 99 | 99 | 99 | 99 | 99 |
| 308435  | 0 | 2 | 3 | 4 | 4 | 2 | 1 | 1 | 2 | 4 | 0 | 0 | 1 | 1  | 1  | 1  | 0  | 0  | 0  |
| 308436  | 1 | 1 | 3 | 4 | 4 | 5 | 2 | 1 | 2 | 4 | 0 | 0 | 1 | 1  | 2  | 1  | 1  | 0  | 1  |
| 308437  | 0 | 1 | 3 | 5 | 4 | 5 | 2 | 2 | 2 | 4 | 1 | 0 | 0 | 99 | 99 | 99 | 99 | 99 | 99 |
| 308438  | 1 | 2 | 3 | 2 | 4 | 3 | 2 | 1 | 2 | 3 | 0 | 0 | 0 | 99 | 99 | 99 | 99 | 99 | 99 |
| 308439  | 0 | 2 | 3 | 2 | 4 | 2 | 2 | 2 | 2 | 4 | 0 | 0 | 0 | 99 | 99 | 99 | 99 | 99 | 99 |
| 3084310 | 1 | 3 | 3 | 3 | 4 | 2 | 1 | 2 | 2 | 3 | 0 | 0 | 1 | 1  | 1  | 1  | 0  | 0  | 0  |
| 3084311 | 0 | 2 | 3 | 2 | 4 | 2 | 2 | 2 | 2 | 4 | 0 | 0 | 1 | 1  | 3  | 1  | 1  | 0  | 1  |
| 3084312 | 0 | 2 | 3 | 2 | 2 | 1 | 2 | 2 | 4 | 1 | 0 | 0 | 0 | 99 | 99 | 99 | 99 | 99 | 99 |
| 3084313 | 1 | 5 | 3 | 2 | 4 | 2 | 2 | 1 | 4 | 2 | 0 | 0 | 0 | 99 | 99 | 99 | 99 | 99 | 99 |
| 3084314 | 0 | 1 | 3 | 4 | 4 | 1 | 2 | 2 | 4 | 4 | 0 | 0 | 0 | 99 | 99 | 99 | 99 | 99 | 99 |
| 3084315 | 1 | 4 | 3 | 4 | 4 | 3 | 3 | 2 | 4 | 2 | 0 | 0 | 0 | 99 | 99 | 99 | 99 | 99 | 99 |
| 3084316 | 1 | 1 | 3 | 2 | 4 | 2 | 3 | 1 | 4 | 4 | 0 | 0 | 1 | 1  | 1  | 6  | 0  | 1  | 1  |
| 3084317 | 1 | 1 | 3 | 4 | 2 | 2 | 2 | 2 | 4 | 3 | 0 | 0 | 1 | 1  | 1  | 6  | 0  | 1  | 1  |
| 3084318 | 0 | 1 | 3 | 2 | 4 | 1 | 2 | 1 | 4 | 4 | 0 | 0 | 0 | 99 | 99 | 99 | 99 | 99 | 99 |
| 3084319 | 0 | 2 | 3 | 2 | 4 | 1 | 2 | 2 | 4 | 4 | 0 | 0 | 0 | 99 | 99 | 99 | 99 | 99 | 99 |
| 3084320 | 1 | 2 | 3 | 3 | 4 | 2 | 3 | 2 | 4 | 4 | 0 | 0 | 0 | 99 | 99 | 99 | 99 | 99 | 99 |
| 3084321 | 1 | 5 | 3 | 2 | 4 | 2 | 2 | 2 | 4 | 2 | 0 | 0 | 1 | 1  | 4  | 1  | 1  | 0  | 1  |
| 3084322 | 0 | 3 | 3 | 2 | 4 | 3 | 3 | 2 | 4 | 2 | 0 | 0 | 0 | 99 | 99 | 99 | 99 | 99 | 99 |
| 3084323 | 0 | 3 | 3 | 2 | 4 | 2 | 2 | 2 | 4 | 3 | 0 | 0 | 0 | 99 | 99 | 99 | 99 | 99 | 99 |
| 3084324 | 1 | 1 | 3 | 2 | 4 | 2 | 3 | 1 | 4 | 4 | 0 | 0 | 0 | 99 | 99 | 99 | 99 | 99 | 99 |
| 3084325 | 0 | 3 | 3 | 4 | 4 | 1 | 3 | 2 | 4 | 1 | 0 | 0 | 0 | 99 | 99 | 99 | 99 | 99 | 99 |
| 3084326 | 0 | 1 | 3 | 2 | 4 | 2 | 1 | 1 | 4 | 4 | 0 | 0 | 0 | 99 | 99 | 99 | 99 | 99 | 99 |
| 3084327 | 0 | 1 | 3 | 2 | 4 | 2 | 1 | 1 | 4 | 4 | 0 | 0 | 0 | 99 | 99 | 99 | 99 | 99 | 99 |
| 3084328 | 0 | 1 | 3 | 5 | 4 | 5 | 2 | 2 | 4 | 4 | 0 | 0 | 0 | 99 | 99 | 99 | 99 | 99 | 99 |
| 3084329 | 1 | 5 | 3 | 5 | 4 | 5 | 3 | 2 | 4 | 1 | 1 | 1 | 1 | 1  | 2  | 1  | 1  | 0  | 1  |
| 3084330 | 0 | 2 | 3 | 2 | 4 | 2 | 2 | 1 | 4 | 4 | 0 | 0 | 0 | 99 | 99 | 99 | 99 | 99 | 99 |
| 3084331 | 1 | 4 | 3 | 4 | 4 | 2 | 2 | 1 | 4 | 4 | 0 | 0 | 1 | 1  | 4  | 1  | 1  | 0  | 1  |
| 3084332 | 1 | 2 | 3 | 5 | 4 | 5 | 2 | 1 | 4 | 3 | 1 | 1 | 1 | 1  | 1  | 6  | 0  | 1  | 1  |
| 3084333 | 0 | 2 | 3 | 5 | 4 | 5 | 3 | 1 | 4 | 4 | 1 | 1 | 0 | 99 | 99 | 99 | 99 | 99 | 99 |
| 3084334 | 1 | 4 | 3 | 5 | 4 | 5 | 3 | 2 | 4 | 4 | 1 | 1 | 0 | 99 | 99 | 99 | 99 | 99 | 99 |
| 3084335 | 1 | 4 | 3 | 5 | 4 | 5 | 3 | 1 | 4 | 3 | 0 | 0 | 1 | 1  | 1  | 1  | 0  | 0  | 0  |
| 3084336 | 1 | 4 | 3 | 5 | 3 | 5 | 3 | 2 | 4 | 4 | 1 | 1 | 1 | 1  | 1  | 1  | 0  | 0  | 0  |
| 3084337 | 0 | 4 | 3 | 2 | 4 | 1 | 3 | 1 | 4 | 4 | 0 | 0 | 1 | 1  | 1  | 1  | 0  | 0  | 0  |
| 3084338 | 1 | 3 | 3 | 4 | 4 | 3 | 3 | 2 | 4 | 3 | 1 | 0 | 0 | 99 | 99 | 99 | 99 | 99 | 99 |
| 3084339 | 1 | 4 | 3 | 3 | 4 | 2 | 3 | 1 | 4 | 4 | 0 | 0 | 1 | 1  | 3  | 1  | 1  | 0  | 1  |
| 308441  | 0 | 2 | 3 | 3 | 4 | 2 | 2 | 1 | 2 | 4 | 0 | 0 | 1 | 1  | 2  | 1  | 1  | 0  | 1  |
| 308442  | 0 | 2 | 3 | 2 | 4 | 2 | 2 | 2 | 2 | 4 | 0 | 0 | 0 | 99 | 99 | 99 | 99 | 99 | 99 |
| 308443  | 0 | 2 | 3 | 2 | 4 | 2 | 2 | 2 | 2 | 1 | 0 | 0 | 0 | 99 | 99 | 99 | 99 | 99 | 99 |
| 308444  | 0 | 5 | 3 | 2 | 4 | 2 | 2 | 1 | 2 | 1 | 0 | 0 | 1 | 1  | 1  | 1  | 0  | 0  | 0  |
| 308445  | 0 | 5 | 3 | 2 | 4 | 2 | 2 | 1 | 2 | 1 | 0 | 0 | 1 | 1  | 3  | 1  | 1  | 0  | 1  |
| 308446  | 1 | 4 | 3 | 2 | 4 | 2 | 2 | 2 | 2 | 1 | 0 | 0 | 1 | 1  | 3  | 1  | 1  | 0  | 1  |
| 308447  | 1 | 5 | 3 | 2 | 4 | 2 | 2 | 1 | 2 | 3 | 1 | 1 | 0 | 99 | 99 | 99 | 99 | 99 | 99 |
| 308448  | 1 | 5 | 3 | 2 | 4 | 2 | 2 | 2 | 2 | 4 | 0 | 0 | 0 | 99 | 99 | 99 | 99 | 99 | 99 |
| 308449  | 0 | 1 | 3 | 2 | 4 | 2 | 1 | 1 | 2 | 4 | 0 | 0 | 1 | 1  | 3  | 1  | 1  | 0  | 1  |
| 3084410 | 1 | 3 | 3 | 3 | 4 | 2 | 2 | 1 | 2 | 4 | 0 | 0 | 0 | 99 | 99 | 99 | 99 | 99 | 99 |
| 3084411 | 1 | 5 | 3 | 1 | 4 | 2 | 2 | 2 | 2 | 2 | 0 | 0 | 0 | 99 | 99 | 99 | 99 | 99 | 99 |
| 3084412 | 1 | 3 | 3 | 4 | 4 | 3 | 3 | 1 | 2 | 1 | 1 | 0 | 1 | 1  | 4  | 6  | 1  | 1  | 1  |
| 3084413 | 1 | 5 | 3 | 2 | 4 | 2 | 2 | 1 | 2 | 1 | 0 | 0 | 1 | 1  | 4  | 1  | 1  | 0  | 1  |
| 3084414 | 1 | 3 | 3 | 4 | 4 | 5 | 3 | 2 | 2 | 1 | 0 | 0 | 1 | 1  | 1  | 1  | 0  | 0  | 0  |
| 3084415 | 1 | 1 | 3 | 2 | 4 | 4 | 3 | 2 | 2 | 1 | 0 | 0 | 1 | 1  | 3  | 1  | 1  | 0  | 1  |
| 3084416 | 0 | 3 | 3 | 2 | 4 | 2 | 2 | 1 | 2 | 1 | 0 | 0 | 0 | 99 | 99 | 99 | 99 | 99 | 99 |
| 3084417 | 0 | 1 | 3 | 5 | 4 | 5 | 3 | 2 | 2 | 3 | 0 | 0 | 1 | 1  | 3  | 1  | 1  | 0  | 1  |
| 3084418 | 1 | 2 | 3 | 3 | 4 | 2 | 3 | 1 | 2 | 3 | 1 | 1 | 0 | 99 | 99 | 99 | 99 | 99 | 99 |
| 3084419 | 1 | 1 | 3 | 4 | 4 | 2 | 2 | 1 | 2 | 3 | 0 | 0 | 1 | 1  | 3  | 1  | 1  | 0  | 1  |



|         |   |   |   |   |   |   |   |   |   |   |   |   |   |    |    |    |    |    |    |
|---------|---|---|---|---|---|---|---|---|---|---|---|---|---|----|----|----|----|----|----|
| 3084420 | 1 | 5 | 3 | 2 | 4 | 2 | 1 | 2 | 2 | 1 | 0 | 0 | 0 | 99 | 99 | 99 | 99 | 99 | 99 |
| 3084421 | 0 | 2 | 3 | 3 | 4 | 1 | 3 | 1 | 2 | 4 | 0 | 0 | 0 | 99 | 99 | 99 | 99 | 99 | 99 |
| 3084422 | 0 | 2 | 3 | 2 | 4 | 2 | 2 | 2 | 2 | 4 | 0 | 0 | 0 | 99 | 99 | 99 | 99 | 99 | 99 |
| 3084423 | 1 | 2 | 3 | 5 | 4 | 5 | 3 | 1 | 2 | 4 | 0 | 0 | 1 | 1  | 1  | 1  | 0  | 0  | 0  |
| 3084424 | 1 | 1 | 3 | 5 | 4 | 5 | 3 | 1 | 2 | 4 | 0 | 0 | 1 | 1  | 1  | 6  | 0  | 1  | 1  |
| 3084425 | 1 | 2 | 3 | 4 | 4 | 5 | 3 | 2 | 2 | 4 | 1 | 0 | 0 | 99 | 99 | 99 | 99 | 99 | 99 |
| 3084426 | 0 | 1 | 3 | 5 | 4 | 5 | 3 | 1 | 2 | 3 | 1 | 0 | 1 | 1  | 1  | 1  | 0  | 0  | 0  |
| 308451  | 0 | 4 | 3 | 1 | 4 | 2 | 2 | 2 | 3 | 2 | 0 | 0 | 1 | 1  | 1  | 1  | 0  | 0  | 0  |
| 308452  | 1 | 2 | 3 | 2 | 4 | 2 | 1 | 2 | 3 | 2 | 0 | 0 | 1 | 1  | 1  | 4  | 0  | 1  | 1  |
| 308453  | 0 | 3 | 3 | 2 | 4 | 2 | 2 | 1 | 3 | 2 | 0 | 0 | 0 | 99 | 99 | 99 | 99 | 99 | 99 |
| 308454  | 0 | 2 | 3 | 2 | 4 | 2 | 1 | 2 | 3 | 3 | 0 | 0 | 0 | 99 | 99 | 99 | 99 | 99 | 99 |
| 308455  | 0 | 4 | 3 | 1 | 4 | 2 | 1 | 1 | 3 | 2 | 0 | 0 | 1 | 1  | 1  | 6  | 0  | 1  | 1  |
| 308456  | 1 | 2 | 3 | 2 | 4 | 2 | 2 | 2 | 1 | 2 | 0 | 0 | 1 | 1  | 1  | 1  | 0  | 0  | 0  |
| 308457  | 1 | 2 | 3 | 2 | 4 | 2 | 1 | 2 | 3 | 3 | 0 | 0 | 1 | 1  | 1  | 4  | 0  | 1  | 1  |
| 308458  | 0 | 3 | 3 | 2 | 4 | 2 | 2 | 1 | 3 | 3 | 0 | 0 | 0 | 99 | 99 | 99 | 99 | 99 | 99 |
| 308459  | 0 | 2 | 3 | 1 | 4 | 2 | 1 | 1 | 3 | 2 | 0 | 0 | 1 | 1  | 1  | 4  | 0  | 1  | 1  |
| 3084510 | 0 | 2 | 3 | 2 | 4 | 2 | 2 | 1 | 3 | 2 | 0 | 0 | 1 | 1  | 1  | 4  | 0  | 1  | 1  |
| 3084511 | 1 | 4 | 3 | 1 | 4 | 2 | 1 | 2 | 3 | 2 | 0 | 0 | 1 | 1  | 1  | 4  | 0  | 1  | 1  |
| 3084512 | 0 | 2 | 3 | 2 | 4 | 2 | 1 | 2 | 3 | 2 | 0 | 0 | 1 | 1  | 1  | 4  | 0  | 1  | 1  |
| 3084513 | 0 | 1 | 3 | 2 | 4 | 2 | 1 | 1 | 3 | 2 | 0 | 0 | 1 | 1  | 1  | 4  | 0  | 1  | 1  |
| 3084514 | 0 | 1 | 3 | 2 | 4 | 2 | 1 | 1 | 3 | 2 | 0 | 0 | 1 | 1  | 1  | 4  | 0  | 1  | 1  |
| 3084515 | 1 | 4 | 3 | 1 | 4 | 2 | 1 | 1 | 3 | 2 | 0 | 0 | 1 | 1  | 1  | 4  | 0  | 1  | 1  |
| 3084516 | 1 | 4 | 3 | 2 | 4 | 2 | 1 | 2 | 3 | 2 | 0 | 0 | 1 | 1  | 1  | 4  | 0  | 1  | 1  |
| 3084517 | 0 | 4 | 3 | 2 | 4 | 2 | 1 | 2 | 3 | 2 | 0 | 0 | 1 | 1  | 3  | 4  | 1  | 1  | 1  |
| 3084518 | 1 | 3 | 3 | 2 | 4 | 2 | 1 | 2 | 3 | 2 | 0 | 0 | 1 | 1  | 1  | 4  | 0  | 1  | 1  |
| 3084519 | 0 | 4 | 3 | 1 | 4 | 2 | 1 | 1 | 3 | 2 | 0 | 0 | 1 | 1  | 1  | 4  | 0  | 1  | 1  |
| 3084520 | 0 | 5 | 3 | 2 | 4 | 2 | 1 | 1 | 3 | 2 | 0 | 0 | 1 | 1  | 1  | 4  | 0  | 1  | 1  |
| 3084521 | 0 | 4 | 3 | 2 | 4 | 2 | 1 | 2 | 3 | 2 | 0 | 0 | 1 | 1  | 1  | 4  | 0  | 1  | 1  |
| 3084522 | 0 | 2 | 3 | 2 | 4 | 2 | 2 | 2 | 3 | 2 | 0 | 0 | 1 | 1  | 1  | 6  | 0  | 1  | 1  |
| 3084523 | 0 | 1 | 3 | 2 | 4 | 2 | 1 | 1 | 3 | 2 | 0 | 0 | 1 | 1  | 1  | 6  | 0  | 1  | 1  |
| 3084524 | 1 | 4 | 3 | 2 | 4 | 2 | 1 | 2 | 3 | 2 | 0 | 0 | 1 | 1  | 1  | 1  | 0  | 0  | 0  |
| 3084525 | 1 | 5 | 3 | 2 | 4 | 2 | 1 | 1 | 3 | 2 | 0 | 0 | 1 | 1  | 1  | 4  | 0  | 1  | 1  |
| 308461  | 0 | 4 | 3 | 3 | 4 | 2 | 3 | 2 | 3 | 2 | 1 | 1 | 1 | 1  | 1  | 6  | 0  | 1  | 1  |
| 308462  | 1 | 3 | 3 | 1 | 4 | 2 | 1 | 1 | 3 | 2 | 0 | 0 | 1 | 1  | 1  | 1  | 0  | 0  | 0  |
| 308463  | 1 | 2 | 3 | 2 | 4 | 2 | 2 | 1 | 3 | 2 | 0 | 0 | 1 | 1  | 1  | 4  | 0  | 1  | 1  |
| 308464  | 1 | 4 | 3 | 1 | 4 | 2 | 1 | 2 | 3 | 2 | 0 | 0 | 1 | 1  | 1  | 4  | 0  | 1  | 1  |
| 308465  | 0 | 5 | 3 | 2 | 4 | 2 | 1 | 1 | 3 | 2 | 0 | 0 | 1 | 1  | 1  | 4  | 0  | 1  | 1  |
| 308466  | 1 | 3 | 3 | 2 | 4 | 2 | 1 | 1 | 3 | 2 | 0 | 0 | 1 | 1  | 2  | 1  | 1  | 0  | 1  |
| 308467  | 0 | 4 | 3 | 2 | 4 | 2 | 2 | 1 | 3 | 2 | 0 | 0 | 1 | 1  | 1  | 6  | 0  | 1  | 1  |
| 308468  | 0 | 3 | 3 | 2 | 4 | 2 | 2 | 2 | 3 | 2 | 0 | 0 | 1 | 1  | 1  | 1  | 0  | 0  | 0  |
| 308469  | 0 | 5 | 3 | 2 | 4 | 2 | 1 | 1 | 3 | 2 | 0 | 0 | 1 | 1  | 1  | 4  | 0  | 1  | 1  |
| 3084610 | 1 | 2 | 3 | 2 | 4 | 2 | 1 | 1 | 3 | 2 | 0 | 0 | 1 | 1  | 1  | 1  | 0  | 0  | 0  |
| 3084611 | 1 | 2 | 3 | 2 | 4 | 2 | 1 | 2 | 3 | 2 | 0 | 0 | 1 | 1  | 1  | 4  | 0  | 1  | 1  |
| 3084612 | 0 | 3 | 3 | 2 | 4 | 2 | 2 | 1 | 3 | 2 | 0 | 0 | 1 | 1  | 1  | 6  | 0  | 1  | 1  |
| 3084613 | 0 | 3 | 3 | 4 | 4 | 2 | 2 | 1 | 3 | 2 | 0 | 0 | 1 | 1  | 1  | 1  | 0  | 0  | 0  |
| 3084614 | 1 | 5 | 3 | 2 | 4 | 2 | 1 | 1 | 3 | 2 | 0 | 0 | 1 | 1  | 1  | 4  | 0  | 1  | 1  |
| 3084615 | 1 | 5 | 3 | 2 | 4 | 2 | 2 | 1 | 3 | 2 | 0 | 0 | 1 | 1  | 1  | 4  | 0  | 1  | 1  |
| 3084616 | 1 | 4 | 3 | 4 | 4 | 2 | 1 | 1 | 3 | 2 | 0 | 0 | 1 | 1  | 1  | 4  | 0  | 1  | 1  |
| 3084617 | 0 | 4 | 3 | 2 | 4 | 2 | 1 | 2 | 3 | 2 | 0 | 0 | 1 | 1  | 1  | 4  | 0  | 1  | 1  |
| 3084618 | 1 | 4 | 3 | 2 | 4 | 2 | 1 | 2 | 3 | 2 | 0 | 0 | 1 | 1  | 1  | 4  | 0  | 1  | 1  |
| 3084619 | 1 | 4 | 3 | 2 | 4 | 2 | 1 | 2 | 3 | 2 | 0 | 0 | 1 | 1  | 1  | 4  | 0  | 1  | 1  |
| 3084620 | 1 | 3 | 3 | 2 | 4 | 2 | 1 | 1 | 3 | 2 | 0 | 0 | 1 | 1  | 1  | 4  | 0  | 1  | 1  |
| 3084621 | 0 | 5 | 3 | 1 | 4 | 2 | 1 | 2 | 3 | 2 | 0 | 0 | 1 | 1  | 1  | 4  | 0  | 1  | 1  |
| 3084622 | 1 | 3 | 3 | 2 | 4 | 2 | 1 | 1 | 3 | 2 | 0 | 0 | 1 | 1  | 1  | 4  | 0  | 1  | 1  |
| 3084623 | 1 | 4 | 3 | 2 | 4 | 2 | 1 | 1 | 3 | 2 | 0 | 0 | 1 | 1  | 1  | 4  | 0  | 1  | 1  |
| 3084624 | 1 | 3 | 3 | 2 | 4 | 2 | 1 | 2 | 3 | 2 | 0 | 0 | 1 | 1  | 1  | 4  | 0  | 1  | 1  |

|         |   |   |   |   |   |   |   |   |   |   |   |   |   |   |   |   |   |   |   |
|---------|---|---|---|---|---|---|---|---|---|---|---|---|---|---|---|---|---|---|---|
| 3084625 | 0 | 4 | 3 | 2 | 4 | 2 | 1 | 1 | 3 | 2 | 0 | 0 | 1 | 1 | 1 | 4 | 0 | 1 | 1 |
| 309471  | 1 | 4 | 3 | 4 | 4 | 2 | 2 | 2 | 4 | 2 | 1 | 1 | 1 | 1 | 1 | 1 | 0 | 0 | 0 |
| 309472  | 0 | 3 | 3 | 3 | 4 | 2 | 1 | 1 | 4 | 1 | 0 | 0 | 1 | 1 | 2 | 1 | 1 | 0 | 1 |
| 309473  | 1 | 3 | 3 | 2 | 4 | 2 | 1 | 2 | 4 | 2 | 0 | 0 | 1 | 1 | 1 | 1 | 0 | 0 | 0 |
| 309474  | 1 | 4 | 3 | 2 | 4 | 2 | 1 | 2 | 4 | 1 | 1 | 0 | 1 | 1 | 1 | 1 | 0 | 0 | 0 |
| 309475  | 0 | 2 | 3 | 2 | 4 | 2 | 1 | 1 | 4 | 1 | 1 | 1 | 1 | 1 | 1 | 1 | 0 | 0 | 0 |
| 309476  | 0 | 3 | 3 | 4 | 4 | 1 | 3 | 2 | 4 | 4 | 1 | 1 | 1 | 1 | 1 | 1 | 0 | 0 | 0 |
| 309477  | 1 | 2 | 3 | 2 | 4 | 2 | 2 | 2 | 4 | 1 | 0 | 0 | 1 | 1 | 2 | 1 | 1 | 0 | 1 |
| 309478  | 1 | 4 | 3 | 4 | 4 | 2 | 1 | 2 | 4 | 1 | 1 | 0 | 1 | 1 | 1 | 1 | 0 | 0 | 0 |
| 309479  | 1 | 5 | 3 | 2 | 4 | 2 | 1 | 1 | 4 | 4 | 1 | 0 | 1 | 1 | 2 | 4 | 1 | 1 | 1 |
| 3094710 | 1 | 2 | 3 | 2 | 4 | 2 | 3 | 1 | 4 | 4 | 0 | 0 | 1 | 1 | 2 | 1 | 1 | 0 | 1 |
| 3094711 | 0 | 2 | 3 | 2 | 4 | 2 | 1 | 1 | 4 | 4 | 0 | 0 | 1 | 1 | 2 | 1 | 1 | 0 | 1 |
| 3094712 | 0 | 2 | 3 | 5 | 4 | 5 | 2 | 2 | 4 | 3 | 0 | 0 | 1 | 1 | 1 | 1 | 0 | 0 | 0 |
| 3094713 | 1 | 1 | 3 | 2 | 4 | 2 | 2 | 2 | 4 | 4 | 0 | 0 | 1 | 1 | 2 | 4 | 1 | 1 | 1 |
| 3094714 | 1 | 1 | 3 | 2 | 4 | 2 | 1 | 1 | 4 | 4 | 0 | 0 | 1 | 1 | 3 | 1 | 1 | 0 | 1 |
| 3094715 | 1 | 4 | 3 | 2 | 4 | 2 | 1 | 1 | 4 | 4 | 0 | 0 | 1 | 1 | 1 | 4 | 0 | 1 | 1 |
| 3094716 | 1 | 2 | 3 | 2 | 4 | 2 | 2 | 2 | 4 | 4 | 0 | 0 | 1 | 1 | 3 | 1 | 1 | 0 | 1 |
| 3094717 | 1 | 2 | 3 | 5 | 4 | 5 | 3 | 1 | 4 | 1 | 1 | 0 | 1 | 1 | 1 | 1 | 0 | 0 | 0 |
| 3094718 | 1 | 2 | 3 | 2 | 4 | 2 | 1 | 2 | 4 | 2 | 0 | 0 | 1 | 1 | 3 | 1 | 1 | 0 | 1 |
| 3094719 | 0 | 2 | 3 | 3 | 4 | 2 | 2 | 2 | 4 | 2 | 0 | 0 | 1 | 1 | 2 | 1 | 1 | 0 | 1 |
| 3094720 | 0 | 4 | 3 | 3 | 4 | 2 | 1 | 1 | 4 | 2 | 0 | 0 | 1 | 1 | 2 | 1 | 1 | 0 | 1 |
| 3094721 | 1 | 3 | 3 | 2 | 4 | 2 | 1 | 2 | 4 | 2 | 0 | 0 | 1 | 1 | 2 | 1 | 1 | 0 | 1 |
| 3094722 | 0 | 3 | 3 | 2 | 4 | 2 | 1 | 2 | 4 | 2 | 0 | 0 | 1 | 1 | 2 | 1 | 1 | 0 | 1 |
| 3094723 | 1 | 3 | 3 | 3 | 4 | 2 | 1 | 2 | 4 | 2 | 0 | 0 | 1 | 1 | 2 | 1 | 1 | 0 | 1 |
| 3094724 | 0 | 1 | 3 | 5 | 4 | 5 | 2 | 2 | 4 | 1 | 0 | 0 | 1 | 1 | 2 | 1 | 1 | 0 | 1 |
| 3094725 | 1 | 5 | 3 | 2 | 4 | 2 | 1 | 1 | 4 | 1 | 0 | 0 | 1 | 1 | 2 | 1 | 1 | 0 | 1 |
| 3094726 | 0 | 4 | 3 | 2 | 4 | 2 | 1 | 1 | 4 | 1 | 0 | 0 | 1 | 1 | 2 | 1 | 1 | 0 | 1 |
| 3094727 | 1 | 3 | 3 | 3 | 4 | 2 | 1 | 2 | 4 | 1 | 0 | 0 | 1 | 1 | 2 | 1 | 1 | 0 | 1 |
| 3094728 | 0 | 1 | 3 | 4 | 4 | 2 | 2 | 1 | 4 | 1 | 0 | 0 | 1 | 1 | 2 | 1 | 1 | 0 | 1 |
| 3094729 | 0 | 3 | 3 | 4 | 4 | 2 | 1 | 1 | 4 | 2 | 0 | 0 | 1 | 1 | 2 | 1 | 1 | 0 | 1 |
| 3094730 | 1 | 3 | 3 | 3 | 4 | 2 | 1 | 2 | 4 | 2 | 0 | 0 | 1 | 1 | 2 | 1 | 1 | 0 | 1 |
| 3094731 | 0 | 3 | 3 | 2 | 4 | 2 | 1 | 2 | 4 | 2 | 0 | 0 | 1 | 1 | 2 | 1 | 1 | 0 | 1 |
| 3094732 | 1 | 2 | 3 | 2 | 4 | 2 | 1 | 1 | 4 | 2 | 0 | 0 | 1 | 1 | 2 | 1 | 1 | 0 | 1 |
| 3094733 | 0 | 2 | 3 | 2 | 4 | 2 | 2 | 2 | 4 | 1 | 0 | 0 | 1 | 1 | 2 | 1 | 1 | 0 | 1 |
| 3094734 | 0 | 2 | 3 | 4 | 4 | 2 | 3 | 2 | 4 | 1 | 0 | 0 | 1 | 1 | 2 | 1 | 1 | 0 | 1 |
| 3094735 | 0 | 3 | 3 | 4 | 4 | 2 | 1 | 1 | 4 | 2 | 0 | 0 | 1 | 1 | 2 | 1 | 1 | 0 | 1 |
| 3094736 | 0 | 3 | 3 | 4 | 4 | 2 | 1 | 1 | 4 | 1 | 0 | 0 | 1 | 1 | 2 | 1 | 1 | 0 | 1 |
| 3094737 | 0 | 4 | 3 | 3 | 4 | 2 | 2 | 1 | 4 | 4 | 0 | 0 | 1 | 1 | 3 | 1 | 1 | 0 | 1 |
| 3094738 | 0 | 3 | 3 | 3 | 4 | 2 | 1 | 1 | 4 | 2 | 0 | 0 | 1 | 1 | 2 | 1 | 1 | 0 | 1 |
| 3094739 | 0 | 3 | 3 | 2 | 4 | 2 | 1 | 2 | 4 | 2 | 0 | 0 | 1 | 1 | 4 | 1 | 1 | 0 | 1 |
| 3094740 | 0 | 3 | 3 | 4 | 4 | 2 | 2 | 1 | 4 | 2 | 1 | 0 | 1 | 1 | 1 | 1 | 0 | 0 | 0 |
| 309481  | 1 | 2 | 3 | 3 | 4 | 2 | 1 | 1 | 2 | 1 | 0 | 0 | 1 | 1 | 2 | 1 | 1 | 0 | 1 |
| 309482  | 1 | 2 | 3 | 3 | 4 | 2 | 1 | 1 | 2 | 4 | 0 | 0 | 1 | 1 | 2 | 1 | 1 | 0 | 1 |
| 309483  | 0 | 2 | 3 | 5 | 4 | 5 | 1 | 2 | 2 | 1 | 0 | 0 | 1 | 1 | 3 | 1 | 1 | 0 | 1 |
| 309484  | 0 | 5 | 3 | 2 | 4 | 2 | 1 | 2 | 2 | 1 | 0 | 0 | 1 | 1 | 3 | 1 | 1 | 0 | 1 |
| 309485  | 0 | 2 | 3 | 4 | 4 | 2 | 2 | 2 | 2 | 1 | 0 | 0 | 1 | 1 | 2 | 1 | 1 | 0 | 1 |
| 309486  | 0 | 3 | 3 | 2 | 4 | 2 | 2 | 2 | 2 | 1 | 0 | 0 | 1 | 1 | 1 | 1 | 0 | 0 | 0 |
| 309487  | 0 | 3 | 3 | 2 | 4 | 2 | 1 | 2 | 2 | 1 | 0 | 0 | 1 | 1 | 3 | 1 | 1 | 0 | 1 |
| 309488  | 0 | 4 | 3 | 2 | 4 | 2 | 1 | 2 | 2 | 1 | 0 | 0 | 1 | 1 | 1 | 1 | 0 | 0 | 0 |
| 309489  | 0 | 3 | 3 | 2 | 4 | 2 | 2 | 1 | 2 | 1 | 0 | 0 | 1 | 1 | 2 | 1 | 1 | 0 | 1 |
| 3094810 | 0 | 3 | 3 | 2 | 4 | 2 | 1 | 1 | 2 | 2 | 0 | 0 | 1 | 1 | 3 | 1 | 1 | 0 | 1 |
| 3094811 | 0 | 4 | 3 | 2 | 4 | 2 | 1 | 2 | 2 | 2 | 0 | 0 | 1 | 1 | 3 | 1 | 1 | 0 | 1 |
| 3094812 | 1 | 5 | 3 | 2 | 4 | 2 | 1 | 2 | 2 | 2 | 0 | 0 | 1 | 1 | 2 | 1 | 1 | 0 | 1 |
| 3094813 | 1 | 3 | 3 | 2 | 4 | 2 | 1 | 1 | 2 | 1 | 0 | 0 | 1 | 1 | 1 | 1 | 0 | 0 | 0 |
| 3094814 | 1 | 2 | 3 | 2 | 4 | 2 | 2 | 1 | 2 | 1 | 0 | 0 | 1 | 1 | 3 | 1 | 1 | 0 | 1 |
| 3094815 | 1 | 2 | 3 | 4 | 4 | 2 | 1 | 2 | 2 | 1 | 0 | 0 | 1 | 1 | 2 | 1 | 1 | 0 | 1 |

|         |   |   |   |   |   |   |   |   |   |   |   |   |   |   |   |   |   |   |   |
|---------|---|---|---|---|---|---|---|---|---|---|---|---|---|---|---|---|---|---|---|
| 3094816 | 0 | 2 | 3 | 2 | 4 | 2 | 1 | 2 | 2 | 2 | 0 | 0 | 1 | 1 | 2 | 1 | 1 | 0 | 1 |
| 3094817 | 1 | 2 | 3 | 2 | 4 | 2 | 1 | 1 | 2 | 2 | 0 | 0 | 1 | 1 | 3 | 1 | 1 | 0 | 1 |
| 3094818 | 1 | 1 | 3 | 2 | 4 | 2 | 1 | 1 | 2 | 2 | 0 | 0 | 1 | 1 | 3 | 1 | 1 | 0 | 1 |
| 3094819 | 1 | 3 | 3 | 2 | 4 | 2 | 1 | 2 | 2 | 2 | 0 | 0 | 1 | 1 | 3 | 1 | 1 | 0 | 1 |
| 3094820 | 0 | 2 | 3 | 2 | 4 | 2 | 1 | 1 | 2 | 2 | 0 | 0 | 1 | 1 | 2 | 1 | 1 | 0 | 1 |
| 3094821 | 1 | 3 | 3 | 4 | 4 | 2 | 1 | 2 | 2 | 2 | 0 | 0 | 1 | 1 | 3 | 1 | 1 | 0 | 1 |
| 3094822 | 1 | 5 | 3 | 2 | 4 | 2 | 1 | 2 | 2 | 1 | 0 | 0 | 1 | 1 | 2 | 1 | 1 | 0 | 1 |
| 3094823 | 0 | 4 | 3 | 2 | 4 | 2 | 1 | 1 | 2 | 1 | 0 | 0 | 1 | 1 | 2 | 1 | 1 | 0 | 1 |
| 3094824 | 1 | 5 | 3 | 2 | 4 | 2 | 1 | 2 | 2 | 2 | 0 | 0 | 1 | 1 | 2 | 1 | 1 | 0 | 1 |
| 3094825 | 1 | 4 | 3 | 5 | 4 | 2 | 2 | 2 | 2 | 2 | 0 | 0 | 1 | 1 | 2 | 1 | 1 | 0 | 1 |
| 309491  | 1 | 4 | 3 | 2 | 4 | 2 | 1 | 2 | 2 | 1 | 0 | 0 | 1 | 1 | 1 | 4 | 0 | 1 | 1 |
| 309492  | 0 | 2 | 3 | 2 | 4 | 2 | 1 | 1 | 2 | 4 | 0 | 0 | 1 | 1 | 4 | 1 | 1 | 0 | 1 |
| 309493  | 0 | 4 | 3 | 2 | 4 | 2 | 1 | 2 | 2 | 4 | 0 | 0 | 1 | 1 | 2 | 1 | 1 | 0 | 1 |
| 309494  | 0 | 5 | 3 | 2 | 4 | 2 | 1 | 1 | 2 | 3 | 0 | 0 | 1 | 1 | 3 | 1 | 1 | 0 | 1 |
| 309495  | 0 | 2 | 3 | 2 | 4 | 2 | 1 | 1 | 2 | 1 | 0 | 0 | 1 | 1 | 2 | 1 | 1 | 0 | 1 |
| 309496  | 1 | 3 | 3 | 5 | 4 | 5 | 2 | 1 | 2 | 1 | 1 | 1 | 1 | 1 | 1 | 1 | 0 | 0 | 0 |
| 309497  | 1 | 4 | 3 | 2 | 4 | 2 | 1 | 1 | 2 | 2 | 0 | 0 | 1 | 1 | 2 | 1 | 1 | 0 | 1 |
| 309498  | 0 | 1 | 3 | 2 | 4 | 2 | 1 | 1 | 2 | 4 | 0 | 0 | 1 | 1 | 3 | 1 | 1 | 0 | 1 |
| 309499  | 0 | 3 | 3 | 2 | 4 | 2 | 1 | 2 | 2 | 4 | 0 | 0 | 1 | 1 | 3 | 1 | 1 | 0 | 1 |
| 3094910 | 1 | 3 | 3 | 3 | 4 | 2 | 2 | 2 | 2 | 4 | 0 | 0 | 1 | 1 | 4 | 1 | 1 | 0 | 1 |
| 3094911 | 0 | 3 | 3 | 2 | 4 | 2 | 1 | 2 | 2 | 4 | 0 | 0 | 1 | 1 | 3 | 1 | 1 | 0 | 1 |
| 3094912 | 0 | 2 | 3 | 5 | 4 | 5 | 2 | 1 | 2 | 4 | 0 | 0 | 1 | 1 | 4 | 1 | 1 | 0 | 1 |
| 3094913 | 1 | 2 | 3 | 2 | 4 | 2 | 1 | 1 | 3 | 4 | 0 | 0 | 1 | 1 | 2 | 1 | 1 | 0 | 1 |
| 3094914 | 1 | 2 | 3 | 3 | 4 | 2 | 1 | 2 | 2 | 1 | 0 | 0 | 1 | 1 | 1 | 1 | 0 | 0 | 0 |
| 3094915 | 1 | 3 | 3 | 2 | 4 | 2 | 1 | 1 | 2 | 1 | 0 | 0 | 1 | 1 | 2 | 1 | 1 | 0 | 1 |
| 3094916 | 1 | 4 | 3 | 2 | 4 | 2 | 1 | 1 | 2 | 1 | 0 | 0 | 1 | 1 | 1 | 1 | 0 | 0 | 0 |
| 3094917 | 1 | 2 | 3 | 2 | 4 | 2 | 1 | 1 | 2 | 1 | 0 | 0 | 1 | 1 | 1 | 1 | 0 | 0 | 0 |
| 3094918 | 0 | 2 | 3 | 4 | 4 | 2 | 1 | 2 | 2 | 4 | 0 | 0 | 1 | 1 | 1 | 4 | 0 | 1 | 1 |
| 3094919 | 0 | 2 | 3 | 2 | 4 | 2 | 1 | 2 | 2 | 4 | 0 | 0 | 1 | 1 | 3 | 1 | 1 | 0 | 1 |
| 3094920 | 0 | 3 | 3 | 2 | 4 | 2 | 2 | 1 | 2 | 4 | 1 | 0 | 1 | 1 | 3 | 1 | 1 | 0 | 1 |
| 3094921 | 1 | 3 | 3 | 2 | 4 | 2 | 1 | 2 | 2 | 4 | 0 | 0 | 1 | 1 | 1 | 4 | 0 | 1 | 1 |
| 3094922 | 0 | 3 | 3 | 2 | 4 | 2 | 1 | 2 | 2 | 4 | 0 | 0 | 1 | 1 | 3 | 1 | 1 | 0 | 1 |
| 3094923 | 0 | 2 | 3 | 2 | 4 | 2 | 1 | 1 | 2 | 1 | 0 | 0 | 1 | 1 | 1 | 1 | 0 | 0 | 0 |
| 3094924 | 0 | 1 | 3 | 5 | 4 | 5 | 3 | 1 | 2 | 4 | 0 | 0 | 1 | 1 | 3 | 1 | 1 | 0 | 1 |
| 3094925 | 0 | 2 | 3 | 5 | 4 | 5 | 1 | 2 | 2 | 4 | 0 | 0 | 1 | 1 | 3 | 1 | 1 | 0 | 1 |
| 3094926 | 1 | 4 | 3 | 4 | 4 | 2 | 2 | 1 | 2 | 1 | 0 | 0 | 1 | 1 | 1 | 1 | 0 | 0 | 0 |
| 3094927 | 1 | 4 | 3 | 2 | 4 | 2 | 2 | 1 | 2 | 1 | 0 | 0 | 1 | 1 | 1 | 4 | 0 | 1 | 1 |
| 3094928 | 1 | 2 | 3 | 5 | 4 | 5 | 2 | 1 | 2 | 1 | 1 | 1 | 1 | 1 | 1 | 1 | 0 | 0 | 0 |
| 3094929 | 1 | 1 | 3 | 2 | 4 | 2 | 1 | 1 | 2 | 1 | 0 | 0 | 1 | 1 | 2 | 1 | 1 | 0 | 1 |
| 3094930 | 1 | 3 | 3 | 2 | 4 | 2 | 1 | 2 | 2 | 1 | 0 | 0 | 1 | 1 | 2 | 1 | 1 | 0 | 1 |

**Variables explanation**

- RID      Respondent ID
- G        Gender of participants
  - 0    Female
  - 1    Male
- AG      Age group of participants
  - 1    < 30
  - 2    30 – 39
  - 3    40 – 49
  - 4    50 – 59
  - 5    ≥ 60

|      |                                                                                    |
|------|------------------------------------------------------------------------------------|
| D    | District in ENTP                                                                   |
|      | 1 East Sumba                                                                       |
|      | 2 Belu                                                                             |
|      | 3 East Manggarai                                                                   |
| Edu  | Education level of participants                                                    |
|      | 1 No education                                                                     |
|      | 2 Primary school                                                                   |
|      | 3 Junior high school                                                               |
|      | 4 Senior high school'                                                              |
|      | 5 Diploma or above                                                                 |
| Eth  | Ethnicity in ENTP                                                                  |
|      | 1 Sumba                                                                            |
|      | 2 Others                                                                           |
|      | 3 Timor                                                                            |
|      | 4 Manggarai                                                                        |
| Job  | Occupation of participants                                                         |
|      | 1 Housewife                                                                        |
|      | 2 Farmer                                                                           |
|      | 3 Entrepreneur/Salesman                                                            |
|      | 4 Other                                                                            |
|      | 5 Govt. or non-govt. employment                                                    |
| SES  | Social economic status of participants                                             |
|      | 1 Low                                                                              |
|      | 2 Average                                                                          |
|      | 3 High                                                                             |
| FZ   | Family size                                                                        |
|      | 1 $\leq 4$                                                                         |
|      | 2 $> 4$                                                                            |
| HF   | The nearest health facilities                                                      |
|      | 1 Village maternity posts                                                          |
|      | 2 Village health Post                                                              |
|      | 3 Subsidiary Public Health centres                                                 |
|      | 4 Public Health centres                                                            |
| DHF  | Distance to the nearest health facilities                                          |
|      | 1 $< 1$ Km                                                                         |
|      | 2 1 – 2 Km                                                                         |
|      | 3 2 – 3 Km                                                                         |
|      | 4 $\geq 3$ Km                                                                      |
| Inc1 | Category of Household Income based on Provincial Minimum Wages (PMW)               |
|      | 0 Less than PMW                                                                    |
|      | 1 At least PMW                                                                     |
| Inc2 | Category of Household Income based on Indonesia Poverty Line (IPL)                 |
|      | 0 Less than IPL                                                                    |
|      | 1 At least IPL                                                                     |
| Q1   | Hearing malaria term                                                               |
|      | 0 No                                                                               |
|      | 1 Yes                                                                              |
| Q2   | Seeking treatment if participants or their family members have symptoms of malaria |
|      | 0 No                                                                               |
|      | 1 Yes                                                                              |
|      | 99 Not applicable                                                                  |

- Q3 How fast finding treatment if malaria
- 1 One day (Within 24 hours)
  - 2 2 days
  - 3 3 days
  - 4 4 days or more
  - 5 I did not go for treatment
  - 99 Not applicable
- Q4 Place for seeking treatment if participants or their family members have symptoms of malaria
- 1 Public health facilities
  - 2 Private health facilities
  - 4 Traditional healer
  - 5 Self-treatment
  - 6 Buying medicine at kiosk
  - 7 Self-treatment with consuming papaya leaves
  - 99 Not applicable
- O1 Seeking treatment after 24 hours
- 0 No
  - 1 Yes
  - 99 Not applicable
- O2 Seeking treatment at non-health facilities
- 0 No
  - 1 Yes
  - 99 Not applicable
- O3 Poor understanding of appropriate malaria treatment-seeking behaviour (AMTSB)  
(Seeking treatment after 24 hours or at non-health facilities)
- 0 No
  - 1 Yes
  - 99 Not applicable
