# Supplementary material for: Malaria treatment-seeking behaviour and its associated factors: A cross-sectional study in rural East Nusa Tenggara Province, Indonesia
Source: PubMed Central journal article supplement (PMC8815915; doi:10.1371/journal.pone.0263178), 2022-02-04
Supplement: pone.0263178.s003.pdf [file pone.0263178.s003.pdf]

## QUESTIONNAIRE

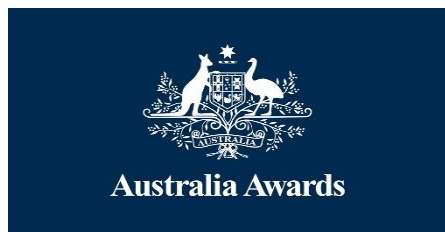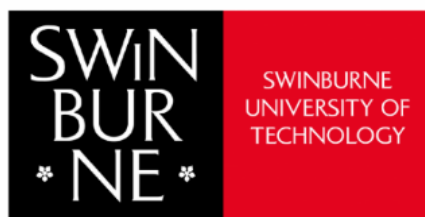

### Questionnaire

Date of interview : \_\_\_\_\_ / \_\_\_\_\_ / 2019

Study ID : 20191428-1490

Name of interviewer : \_\_\_\_\_

Mobile number : \_\_\_\_\_

Interviewer initial : \_\_\_\_\_

#### Participant Info

Name : \_\_\_\_\_

Mobile Number : \_\_\_\_\_

Alternate Number : \_\_\_\_\_

Address : \_\_\_\_\_

Hamlet /Village : \_\_\_\_\_ / \_\_\_\_\_

Category of Village : 1 = Easy access      2 = Moderate access      3 = Difficult access

The availability of village malaria post : 1 = Yes      2 = No

Sub-District/District : \_\_\_\_\_ / \_\_\_\_\_

Geographical conditions : 1 = Coastal area      2 = Rice fields      3 = Hills  
4 = Forest      5 = Swamps

| SECTION 1: DEMOGRAPHIC CHARACTERISTICS                                                     |                                                                                                                                                                                                                                                                    |             |
|--------------------------------------------------------------------------------------------|--------------------------------------------------------------------------------------------------------------------------------------------------------------------------------------------------------------------------------------------------------------------|-------------|
| Questions                                                                                  | Coding Categories                                                                                                                                                                                                                                                  | Answer Code |
| <b>1.1 How old are you?</b>                                                                | ..... years (age in current year)                                                                                                                                                                                                                                  |             |
| <b>1.2 What is your gender?</b>                                                            | 1 = Male                          2 = Female                                                                                                                                                                                                                       |             |
| <b>1.3 What is your highest level of education?</b>                                        | 1 = No education<br>2 = Primary school<br>3 = Junior High school<br>4 = Senior High School<br>5 = Diploma<br>6 = Bachelor or above                                                                                                                                 |             |
| <b>1.4 What is your main occupation?</b>                                                   | 1= Farmer<br>2 = Housewife<br>3= Fisherman<br>4 = Labour<br>5 = Trader/Merchandiser<br>6 = Student<br>7 = Unemployed<br>8 = unable to work<br>9 = Govt. or non-govt. employment (Officers/Police/Army, teachers)<br>10 = others (Please specify):                  |             |
| <b>1.5 What is your ethnicity</b>                                                          | 1 = Manggarai    2 = Timor    3 = Sumba<br>4 = Bajawa       5 = Ende    6 = Ngada<br>7 = Alor         8 = Rote<br>9 = Other (Please specify):                                                                                                                      |             |
| <b>1.6 What is your monthly income (approximately)</b>                                     | Indonesian currency :                                                                                                                                                                                                                                              |             |
| <b>1.7 What is your household monthly income (approximately)</b>                           | Indonesian currency :                                                                                                                                                                                                                                              |             |
| <b>1.8 What is the main material of the floor in your house?</b>                           | 1 = Ceramics<br>2 = Plastering cement<br>3 = Board<br>4 = Soil<br>5 = Others (Please specify) :                                                                                                                                                                    |             |
| <b>1.9 What is the main material of the wall of your house?</b>                            | 1 = Plastering cement<br>2 = Zinc<br>3 = Bamboo /bamboo webbing/ rattan<br>4 = Wood/board/plywood<br>5 = Others (Please specify):                                                                                                                                  |             |
| <b>1.10 What is the main material of the ceiling of your house?</b>                        | 1 = Concrete<br>2 = Wood/Plywood<br>3 = Bamboo webbing<br>4 = None<br>5 = Others (Please specify) :                                                                                                                                                                |             |
| <b>1.11 From the following household items, how many items do you have? Number = .....</b> | 1 = Radio           2 = TV                          3 = TV cable<br>4 = Bike            5 = Motorbike<br>6 = Car             7 = Mobile phone.<br>8 = Electricity    9 = Fridge<br>10 = AC                                  11 = Tractor            12 = Generator |             |
| <b>1.12 What is the main source of drinking water for your family?</b>                     | 1 = Running tap water in dwelling<br>2 = Running tap water of public<br>3 = Drilled well pump<br>4 = Well<br>5 = Spring<br>6 = River<br>7 = Irrigation<br>8 = Other (Please specify)                                                                               |             |
| <b>1.13 What is the nearest health service of your residence?</b>                          | 1 = Public Health centres<br>2 = Subsidiary Public Health centres                                                                                                                                                                                                  |             |

|                                                                                                                              |                                                                                                                                                          |  |
|------------------------------------------------------------------------------------------------------------------------------|----------------------------------------------------------------------------------------------------------------------------------------------------------|--|
|                                                                                                                              | 3 = Village health Post<br>4 = Midwife practices<br>5 = Village maternity posts<br>6 = Polyclinic<br>7 = General practice<br>8 = Other (Please specify): |  |
| <b>1.14</b> <i>What is the distance to the nearest health facility?</i>                                                      | ..... (Distance in Km)                                                                                                                                   |  |
| <b>1.15</b> <i>What is your smoking status?</i>                                                                              | 1 = Never smoke<br>2 = Current smoker (i.e., leaf or cigarette)<br>3 = Past smoker                                                                       |  |
| <b>1.16</b> <i>Do you currently suffering from any health condition?</i>                                                     | 1= Yes<br>2 = No                                                                                                                                         |  |
| <b>1.17</b> <i>If you answer yes on question 1.16, what is the current medical condition? (Please mention your disease):</i> |                                                                                                                                                          |  |

|                                                                                                                                |                                                                                                                                                                                                                                                              |        |
|--------------------------------------------------------------------------------------------------------------------------------|--------------------------------------------------------------------------------------------------------------------------------------------------------------------------------------------------------------------------------------------------------------|--------|
| <b>SECTION 2: GENERAL KNOWLEDGE ABOUT MALARIA</b>                                                                              |                                                                                                                                                                                                                                                              |        |
| <b>2.1</b> <i>Have you heard about malaria before?</i>                                                                         | 1=Yes                                                                                                                                                                                                                                                        | 2 = No |
| <b><i>If you said yes to question 2.1, please complete question 2.2 to 2.13. Otherwise go to section 3</i></b>                 |                                                                                                                                                                                                                                                              |        |
| <b>2.2</b> <i>Where did you hear about malaria?</i>                                                                            | 1 = TV<br>2 = Radio<br>3 = Newspaper<br>4 = Friend/Family member<br>5 = Local health facility<br>6 = School<br>7 = Church<br>8 = Mosque<br>9 = Community meetings<br>10 = Pamphlets<br>11 = Other (Please specify) :                                         |        |
| <b>2.3</b> <i>How would you rank the health effect of malaria?</i>                                                             | 1 = No effect<br>2 = Mild health effect (not so dangerous)<br>3 = Severe health effect (dangerous)                                                                                                                                                           |        |
| <b>2.4</b> <i>Do you know some symptoms of malaria?</i>                                                                        | 1 = Yes      2 = No                                                                                                                                                                                                                                          |        |
| <b>2.5</b> <i>If yes to question 2.4, can you please mention some symptoms of malaria? Tick the number of correct answers:</i> | 1 = 0<br>2 = 1<br>3 = >=2                                                                                                                                                                                                                                    |        |
| <b>2.6</b> <i>What do you think are the main symptoms of malaria infection?</i>                                                | 1=Fever                      2 = Shivering<br>3= Sweating              4 = Headache<br>5=Nausea and vomiting      6 = Diarrhoea<br>7=Dizziness                8 = Loss of appetite<br>9=Body weakness        10 = Joint pains<br>11 = Other (Please specify) |        |
| <b>2.7</b> <i>In your opinion, what is the main causes of malaria?</i>                                                         | 1 = Mosquito bite<br>2 = Witchcraft<br>3 = Drinking dirty water<br>4 = Cold weather<br>5 = Unhygienic environment<br>6 = Close contact with a malaria sufferer<br>7 = Other(Please specify) :                                                                |        |
| <b>2.8</b> <i>Do you think you have enough information on malaria?</i>                                                         | 1 = Yes      2 = No                                                                                                                                                                                                                                          |        |
| <b>2.9</b> <i>If you answer no to question 2.8, what information would you like to get?</i>                                    | 1 = Information on transmission<br>2 = Information on prevention<br>3 = Information on control                                                                                                                                                               |        |

|                                                                                                                                                                         |                                                                                                                                                                                                                                                                                                                                                                                                                                                                                                         |  |
|-------------------------------------------------------------------------------------------------------------------------------------------------------------------------|---------------------------------------------------------------------------------------------------------------------------------------------------------------------------------------------------------------------------------------------------------------------------------------------------------------------------------------------------------------------------------------------------------------------------------------------------------------------------------------------------------|--|
|                                                                                                                                                                         | 4 = Information on treatment<br>5 = Information on signs and symptoms<br>6 = any information<br>7= other (Please specify):                                                                                                                                                                                                                                                                                                                                                                              |  |
| <b>2.10</b> <i>How would you like this information to be communicated to you? (Through what channels of communication?)</i>                                             | 1 = TV<br>2 = Radio<br>3 = Newspaper<br>4 = Friend/Family member<br>5 = Local health facility<br>6 = School<br>7 = Church<br>8 = Mosque<br>9 = Community meetings<br>10 = Pamphlets<br>11 = Other (Please specify) :                                                                                                                                                                                                                                                                                    |  |
| <b>2.11</b> <i>Do you think malaria can be prevented?</i>                                                                                                               | 1 = Yes          2 = No                                                                                                                                                                                                                                                                                                                                                                                                                                                                                 |  |
| <b>2.12</b> <i>If yes to question 2.11, can you please mention some protective measures to guard against malaria? Tick the number of protective measures mentioned:</i> | 1 = 0<br>2 = 1<br>3 = >=2                                                                                                                                                                                                                                                                                                                                                                                                                                                                               |  |
| <b>2.13</b> <i>What personal protective measures can you use to guard against malaria infection?</i>                                                                    | 1 = Sleeping with non-insecticide treated net<br>2 = Sleeping with insecticide treated net received <=3 year ago<br>3 = Sleeping with insecticide treated net received > 3 year ago<br>4 = Using mosquito coil<br>5 = Keep house clean<br>6 = Covering ventilation with anti-mosquito nets<br>7 = Using Indoor Residual Spraying<br>8 = Wearing long sleeved clothes when go outdoors at night<br>9 = Taking anti-malaria drugs when staying at malaria endemic areas.<br>10 = Other (Please specify) : |  |

| <b>SECTION 3: TREATMENT SEEKING BEHAVIOUR</b>                                                                                                        |                                                                                                                                                          |  |
|------------------------------------------------------------------------------------------------------------------------------------------------------|----------------------------------------------------------------------------------------------------------------------------------------------------------|--|
| <b>3.1</b> <i>If you or member of your family present with the signs and symptoms of malaria would you/they seek treatment?</i>                      | 1 = Yes<br>2 = No                                                                                                                                        |  |
| <b>3.2</b> <i>If yes to 3.1, how soon after suspecting that you or your family member are infected with malaria would you/they seek treatment?</i>   | 1 = One day (Within 24 hours)<br>2 = 2 days<br>3 = 3 days<br>4 = 4 days or more<br>5 = I did not go for treatment                                        |  |
| <b>3.3</b> <i>If yes to 3.1 and you or member of your family present with the signs and symptoms of malaria where would you/they seek treatment?</i> | 1 = Public health facilities<br>2 = Private health facilities<br>3 = Traditional healer<br>4 = Pharmacy<br>5 = self-treat<br>6 = other (Please specify): |  |

| <b>SECTION 4: PRACTICE OF PERSONAL PROTECTION</b>                                                                                                                                                                                                      |                                                                                                                                                                                                                                                                                                                                                                                                                                                                                                                                     |  |
|--------------------------------------------------------------------------------------------------------------------------------------------------------------------------------------------------------------------------------------------------------|-------------------------------------------------------------------------------------------------------------------------------------------------------------------------------------------------------------------------------------------------------------------------------------------------------------------------------------------------------------------------------------------------------------------------------------------------------------------------------------------------------------------------------------|--|
| <b>4.1 Does anyone in the household use any personal protective items to help prevent malaria infection?</b>                                                                                                                                           | 1 = Yes                  2 = No                                                                                                                                                                                                                                                                                                                                                                                                                                                                                                     |  |
| <b>4.2 If yes on the question 4.1, can you please mention some protective measures to guard against malaria? Tick number of protective measures mentioned:</b>                                                                                         | 1 = 0<br>2 = 1<br>3 = >=2                                                                                                                                                                                                                                                                                                                                                                                                                                                                                                           |  |
| <b>4.3 What personal protective measures do you use to guard against malaria infection?</b>                                                                                                                                                            | 1 = Sleeping with non-insecticide treated net<br>2 = Sleeping with insecticide treated net received <=3 year ago<br>3 = Sleeping with insecticide treated net received > 3 year ago<br>4 = Using mosquito coil/electric anti mosquito mats<br>5 = Keep house clean<br>6 = Covering ventilation with anti-mosquito nets<br>7 = Using Indoor Residual Spraying<br>8 = wearing long sleeved clothes when go outdoors at night<br>9 = Taking anti-malaria drugs when staying at malaria endemic areas.<br>10 = Other (Please specify) : |  |
| <b>4.4 Have your household received indoor residual spraying ever?</b>                                                                                                                                                                                 | 1 = Yes                  2 = No                                                                                                                                                                                                                                                                                                                                                                                                                                                                                                     |  |
| <b>4.5 If yes on question 4.4, when did it happen?</b>                                                                                                                                                                                                 | Month ..... Year .....                                                                                                                                                                                                                                                                                                                                                                                                                                                                                                              |  |
| <b>4.6 Do you have any mosquito net?</b>                                                                                                                                                                                                               | 1 = Yes                  2 = No                                                                                                                                                                                                                                                                                                                                                                                                                                                                                                     |  |
| <b>4.7 What type of mosquito net do you have?</b>                                                                                                                                                                                                      | 1 = Long Lasting Insecticide-Treated Bet Nets(LLINs)<br>2 = Non LLINs<br>3 = LLINs and Non LLINs                                                                                                                                                                                                                                                                                                                                                                                                                                    |  |
| <b>4.8 If you choose option 1 to question 4.7,</b><br><b>a. How many mosquito nets do you have?</b><br><b>b. When did you get this bed net:</b><br><b>c. Does this bed net eligible to be used?</b><br><b>d. How many sleeping groups do you have?</b> | ..... (Number of LLINs)<br>Year .....<br>1 = Yes                  2 = No<br>.....(Number of sleeping groups)                                                                                                                                                                                                                                                                                                                                                                                                                        |  |
| <b>4.9 If you choose option 2 to question 4.7,</b><br><b>a. How many mosquito nets do you have?</b><br><b>b. Does this bed net eligible to be used?</b>                                                                                                | ..... (Number of non-LLINs)<br>1 = Yes                  2 = No                                                                                                                                                                                                                                                                                                                                                                                                                                                                      |  |
| <i>If you choose option 3 to question 4.7, please complete questions 4.8 and 4.9</i>                                                                                                                                                                   |                                                                                                                                                                                                                                                                                                                                                                                                                                                                                                                                     |  |
| <b>4.10 a. Did you sleep under bed net last night?</b><br><b>b. If yes to question 4.10a, What type of bed net do you use?</b>                                                                                                                         | 1 = Yes                  2 = No<br>1= LLINs                  2 = Non LLINs                                                                                                                                                                                                                                                                                                                                                                                                                                                          |  |
| <b>4.11 Did all of your family members sleep under mosquito net last night?</b>                                                                                                                                                                        | 1 = Yes                  2 = No                                                                                                                                                                                                                                                                                                                                                                                                                                                                                                     |  |
| <b>4.12 If you said no to question 4.10a, what is the main reason?</b>                                                                                                                                                                                 | 1 = Too hot<br>2 = Bed net was not hung up<br>3 = Bed net was not in good condition /torn<br>4 = Mosquito net is for children<br>5 = Mosquito net is for pregnant women<br>6 = No mosquitoes<br>7 = Not get used to<br>8 = other (Please specify):                                                                                                                                                                                                                                                                                  |  |
| <b>4.13 Did you sleep indoors or outdoors last night?</b>                                                                                                                                                                                              | 1 = Indoors              2 = Outdoors                                                                                                                                                                                                                                                                                                                                                                                                                                                                                               |  |

|                                                                                   |                                                                                                                                                                           |  |
|-----------------------------------------------------------------------------------|---------------------------------------------------------------------------------------------------------------------------------------------------------------------------|--|
| <b>4.14</b> <i>To the nearest hour, what time did you go to sleep last night?</i> | 1 = 6-7 pm      2 = 7-8 pm      3 = 8-9 pm<br>4 = 9-10 pm      5 = 10-11pm<br>6 = 11 -12 mid night      7 = after 12 mid night                                            |  |
| <b>4.15</b> <i>To the nearest hour, what time did you wake up today?</i>          | 1 = Before 4 am      2 = 4 – 5 am      3 = 5 – 6 am<br>4 = 6-7 am      5 = 7- 8 am      6 = after 8 am                                                                    |  |
| <b>4.16</b> <i>What time did you finally go indoors for the night?</i>            | 1 = 6-7 pm      2 = 7-8 pm      3 = 8-9 pm<br>4 = 9-10 pm      5 = 10-11pm<br>6 = 11 -12 mid night      7 = after 12 mid night                                            |  |
| <b>4.17</b> <i>What time did you first go outdoors for the day this morning?</i>  | 1 = Before 4 am      2 = 4 – 5 am      3 = 5 – 6 am<br>4 = 6-7 am      5 = 7- 8 am      6 = after 8 am                                                                    |  |
| <b>4.18</b> <i>What is your main activities before you go to sleep?</i>           | 1 = Relaxing<br>2 = Storytelling<br>3 = Watching TV<br>4 = Preparing meals<br>5 = Eating<br>6 = Weaving<br>7 = Fetching water or firewood<br>8 = Other (Please specify) : |  |
| <b>4.19</b> <i>Did you have travel history in the last one month?</i>             | 1 = Yes      2 = No                                                                                                                                                       |  |

**SECTION 5 : PRACTICE FOR MALARIA TREATMENT**

|                                                                                                     |                                                                                                                                                              |  |
|-----------------------------------------------------------------------------------------------------|--------------------------------------------------------------------------------------------------------------------------------------------------------------|--|
| <b>5.1</b> <i>Have you ever suffered from malaria?</i>                                              | 1 = Yes      2 = No                                                                                                                                          |  |
| <i>If you answer yes on question 5.1, please do question 5.2 to 5.11, otherwise go to section 6</i> |                                                                                                                                                              |  |
| <b>5.2</b> <i>When did it occur?</i>                                                                | Month: .....      Year: .....                                                                                                                                |  |
| <b>5.3</b> <i>What symptoms did you have then?</i>                                                  | 1 = Fever      2 = Shivering<br>3 = Sweating      4 = Headache<br>5 = Others (Please specify):                                                               |  |
| <b>5.4</b> <i>How soon after suffering from malaria did you seek treatment?</i>                     | 1 = One day (Within 24 hours)<br>2 = 2 days<br>3 = 3 days<br>4 = 4 days or more<br>5 = I did not go for treatment                                            |  |
| <b>5.5</b> <i>If you sought treatment, where did you go to seek treatment?</i>                      | 1 = Public health facilities<br>2 = Private health facilities<br>3 = Pharmacy<br>4 = Traditional healer<br>5 = self-treatment<br>6 = other (Please specify): |  |
| <b>5.6</b> <i>If your response to 5.5 was option 1 or 2 or 3, did you receive blood test?</i>       | 1 = Yes      2 = No                                                                                                                                          |  |
| <b>5.7</b> <i>If your response to 5.4 was option 1 or 2 or 3, did you receive any medicine?</i>     | 1 = Yes      2 = No                                                                                                                                          |  |
| <b>5.8</b> <i>If you responded yes to 5.6, did you receive the medicine stated below?</i>           |                                                                                                                                                              |  |
| <b>5.8.1</b> <i>Artemisinin-based Combination Treatment (ACT) + 1 day Primaquin</i>                 | 1 = Yes      2 = No                                                                                                                                          |  |
| <b>5.8.2</b> <i>Artemisinin-based Combination Treatment (ACT) + 14 days Primaquin</i>               | 1 = Yes      2 = No                                                                                                                                          |  |
| <b>5.8.3</b> <i>Other medicine ( Please specify):</i>                                               |                                                                                                                                                              |  |

|                                                                                         |                                                                                                                                                                                                                               |  |
|-----------------------------------------------------------------------------------------|-------------------------------------------------------------------------------------------------------------------------------------------------------------------------------------------------------------------------------|--|
| <b>5.9</b> Did you consume the medicine in question 5.7 until finish?                   | 1 = Yes                  2 = No                                                                                                                                                                                               |  |
| <b>5.10</b> If you answered no to question 5.8, what was the main reason for that?      | 1 = Forgot to take<br>2 = Felt better<br>3 = Not comfortable due to drug's side effects<br>4 = Other (Please specify) :                                                                                                       |  |
| <b>5.11</b> If you choose option 4 to question 5.4, what is the main reason to do that? | 1 = Tradition<br>2 = Desperation with modern medication<br>3 = No other health service available<br>4 = More potent<br>5 = The disease is not severe<br>6 = Safer<br>7 = Cheaper<br>8 = Trying<br>9 = Other (Please specify): |  |

| <b>SECTION 6: INFORMATION ABOUT HOUSEHOLD MEMBERS</b>                                                                               |                                                                                                                                                                                                                                                                                                |  |
|-------------------------------------------------------------------------------------------------------------------------------------|------------------------------------------------------------------------------------------------------------------------------------------------------------------------------------------------------------------------------------------------------------------------------------------------|--|
| <b>6.1</b> What is your family size?                                                                                                | The number of family members:                                                                                                                                                                                                                                                                  |  |
| <b>6.2</b> How many children in your family under five years of age?                                                                | The number of children under 5 year :                                                                                                                                                                                                                                                          |  |
| <b>6.3</b> Does your household have at least one pregnant women?                                                                    | 1= Yes                  2 = No                                                                                                                                                                                                                                                                 |  |
| <b>6.4 Information on your spouse (Husband/Wife)</b>                                                                                |                                                                                                                                                                                                                                                                                                |  |
| <b>6.4.1.</b> What is his/her age (in years):                                                                                       |                                                                                                                                                                                                                                                                                                |  |
| <b>6.4.2.</b> What is his/her Sex?                                                                                                  | 1 = Male                  2 = Female                                                                                                                                                                                                                                                           |  |
| <b>6.4.3.</b> What is his/her highest level of education?                                                                           | 1 = No education                  4 = Senior High School<br>2 = Primary school                  6 = Diploma<br>3 = Junior High school                  6 = Bachelor or above                                                                                                                   |  |
| <b>6.4.4.</b> What is his/her main occupation?                                                                                      | 1= Farmer                  2 = housewife<br>3= Fisherman                  4 = Labour<br>6 = Trader/Merchandise<br>6 = Student                  7 = Unemployed<br>8 = unable to work<br>9 = Govt. or non-govt. employment (Officers/<br>Police/Army, teachers)<br>10 = others (Please specify): |  |
| <b>6.4.5.</b> What is his/her smoking status?                                                                                       | 1 = Never smoke<br>2 = Current smoker (i.e., leaf or cigarette)<br>3 = Past smoker                                                                                                                                                                                                             |  |
| <b>6.4.6</b> Does she/he currently suffering from any health condition?                                                             | 1= Yes                  2 = No                                                                                                                                                                                                                                                                 |  |
| <b>6.4.7</b> If you answer yes on question 6.4.6., what is the current her/his medical condition? (Please mention her/his disease): |                                                                                                                                                                                                                                                                                                |  |
| <b>6.4.8</b> Has she/he suffered from malaria ever?                                                                                 | 1= Yes                  2 = No                                                                                                                                                                                                                                                                 |  |
| <b>6.4.9</b> If you answer yes on question 6.4.8, when it did it occur?                                                             | Year                                                                                                                                                                                                                                                                                           |  |
| <b>6.4.10</b> Does she/he sleep under bed net last night?                                                                           | 1= Yes                  2 = No                                                                                                                                                                                                                                                                 |  |
| <b>6.4.11</b> What type of bed net does she/he use?                                                                                 | 1= LLINs                  2 = Non LLINs                                                                                                                                                                                                                                                        |  |
| <b>6.4.12</b> Did he/she had travel history in the last one month?                                                                  | 1= Yes                  2 = No                                                                                                                                                                                                                                                                 |  |

**Child # 1**

|                                                                                                                                           |          |               |
|-------------------------------------------------------------------------------------------------------------------------------------------|----------|---------------|
| <b>6.5 Information on your child under age of five</b>                                                                                    |          |               |
| <i>c1 6.5.1. What is his/her age (in years):</i>                                                                                          |          |               |
| <i>c1 6.5.2. What is his/her Sex?</i>                                                                                                     | 1 = Male | 2 = Female    |
| <i>c1 6.5.3 Does she/he currently suffering from any health condition?</i>                                                                | 1= Yes   | 2 = No        |
| <i>c1 6.5.4 If you answer yes on question c1 6.5.3., what is the current her/his medical condition? (Please mention her/his disease):</i> |          |               |
| <i>c1 6.5.5 Has she/he suffered from malaria?</i>                                                                                         | 1= Yes   | 2 = No        |
| <i>c1 6.5.6 If you answer yes on question c1 6.5.5, when it did it occur?</i>                                                             |          |               |
| <i>c1 6.5.7 Did she/he sleep under bed net last night?</i>                                                                                | 1= Yes   | 2 = No        |
| <i>c1 6.5.8 What type of bed net does she/he use?</i>                                                                                     | 1= LLINs | 2 = Non LLINs |

**Child # 2**

|                                                                                                                                           |          |               |
|-------------------------------------------------------------------------------------------------------------------------------------------|----------|---------------|
| <i>c2 6.5.1. What is his/her age (in years):</i>                                                                                          |          |               |
| <i>c2 6.5.2. What is his/her Sex?</i>                                                                                                     | 1 = Male | 2 = Female    |
| <i>c2 6.5.3 Does she/he currently suffering from any health condition?</i>                                                                | 1= Yes   | 2 = No        |
| <i>c2 6.5.4 If you answer yes on question c2 6.5.3., what is the current her/his medical condition? (Please mention her/his disease):</i> |          |               |
| <i>c2 6.5.5 Has she/he suffered from malaria?</i>                                                                                         | 1= Yes   | 2 = No        |
| <i>c2 6.5.6 If you answer yes on question c2 6.5.5, when it did it occur?</i>                                                             |          |               |
| <i>c2 6.5.7 Did she/he sleep under bed net last night?</i>                                                                                | 1= Yes   | 2 = No        |
| <i>c2 6.5.8 What type of bed net does she/he use?</i>                                                                                     | 1= LLINs | 2 = Non LLINs |

**Child # 3**

|                                                                                                                                           |          |               |
|-------------------------------------------------------------------------------------------------------------------------------------------|----------|---------------|
| <i>c3 6.5.1. What is his/her age (in years):</i>                                                                                          |          |               |
| <i>c3 6.5.2. What is his/her Sex?</i>                                                                                                     | 1 = Male | 2 = Female    |
| <i>c3 6.5.3 Does she/he currently suffering from any health condition?</i>                                                                | 1= Yes   | 2 = No        |
| <i>c3 6.5.4 If you answer yes on question c3 6.5.3., what is the current her/his medical condition? (Please mention her/his disease):</i> |          |               |
| <i>c3 6.5.5 Has she/he suffered from malaria?</i>                                                                                         | 1= Yes   | 2 = No        |
| <i>c3 6.5.6 If you answer yes on question c3 6.5.5, when it did it occur?</i>                                                             |          |               |
| <i>c3 6.5.7 Did she/he sleep under bed net last night?</i>                                                                                | 1= Yes   | 2 = No        |
| <i>c3 6.5.8 What type of bed net does she/he use?</i>                                                                                     | 1= LLINs | 2 = Non LLINs |

Note: Keep cell empty if there is no child and add information if there are more than three children

**THANK YOU VERY MUCH**

We have to come to the end of our interview. Your time, honest opinions and valuable contributions are highly appreciated. Do you have any questions?
